# Supplementary material for: Identification of Gender-Specific Molecular Differences in Glioblastoma (GBM) and Low-Grade Glioma (LGG) by the Analysis of Large Transcriptomic and Epigenomic Datasets
Source: PubMed Central journal article supplement (PMC8491982; doi:10.3389/fonc.2021.699594), 2021-09-21
Supplement: DataSheet_1.pdf [file DataSheet_1.pdf]

# TCGA

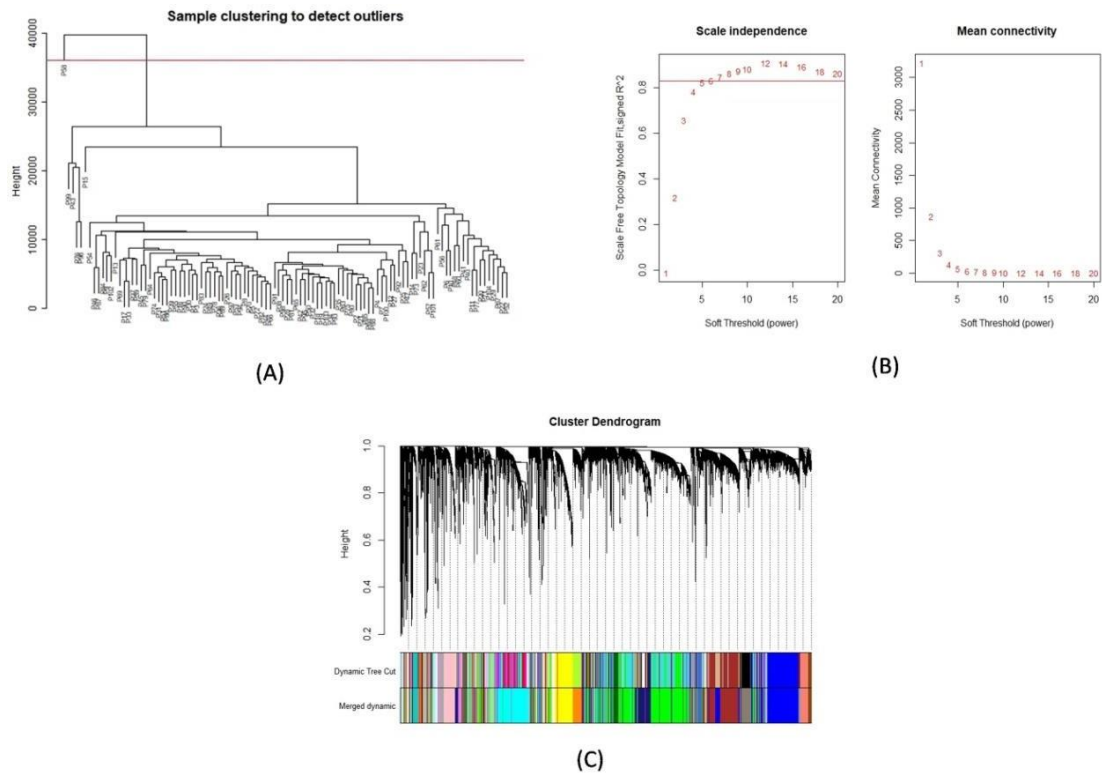

Figure S1: (A – C)

Figure S1. WGCNA network and module detection in TCGA GBM Males: A) Clustering of sample data to detect outliers. B) Determining soft threshold and mean connectivity ( $\beta=6$ ). C) Hierarchical clustering dendrogram of the genes based on topological overlap dissimilarity. Color coded modules of interconnected genes represents branches of clustering tree.

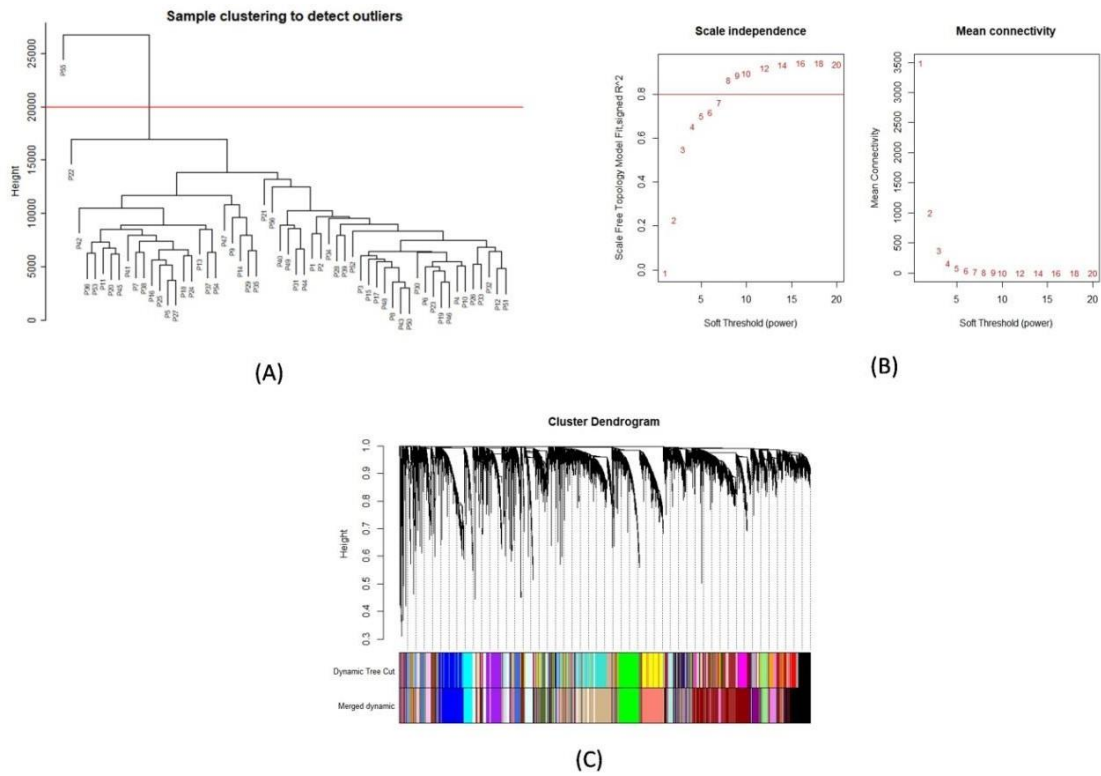

Figure S2: (A – C)

Figure S2. WGCNA network and module detection in TCGA GBM Females: A) clustering of sample data to detect outliers. B) Determining soft threshold and mean connectivity ( $\beta=8$ ). C) Hierarchical clustering dendrogram of the genes based on topological overlap dissimilarity. Color coded modules of interconnected genes represents branches of clustering tree.

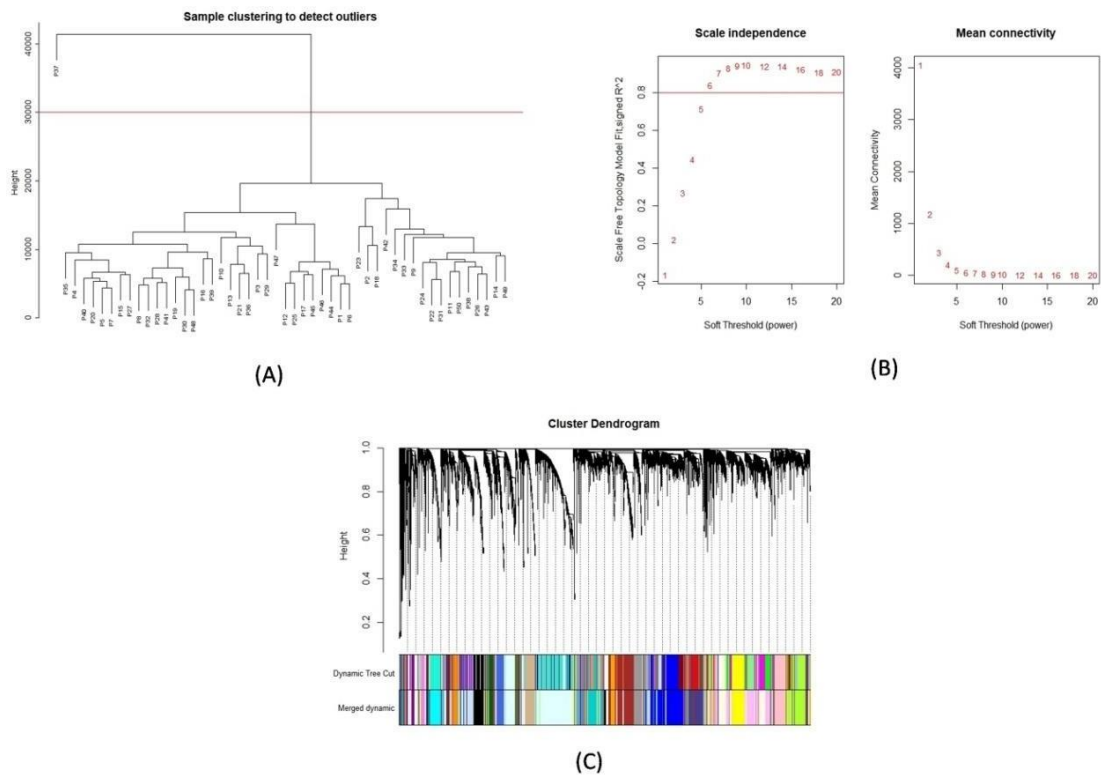

Figure S3: (A – C)

FigureS3. WGCNA network and module detection in TCGA LGG Males: A) Clustering of sampled data to detect outliers. B) Determining soft threshold and mean connectivity ( $\beta=6$ ). C) Hierarchical clustering dendrogram of the genes based on topological overlap dissimilarity. Colour coded modules of interconnected genes represent branches of clustering tree.

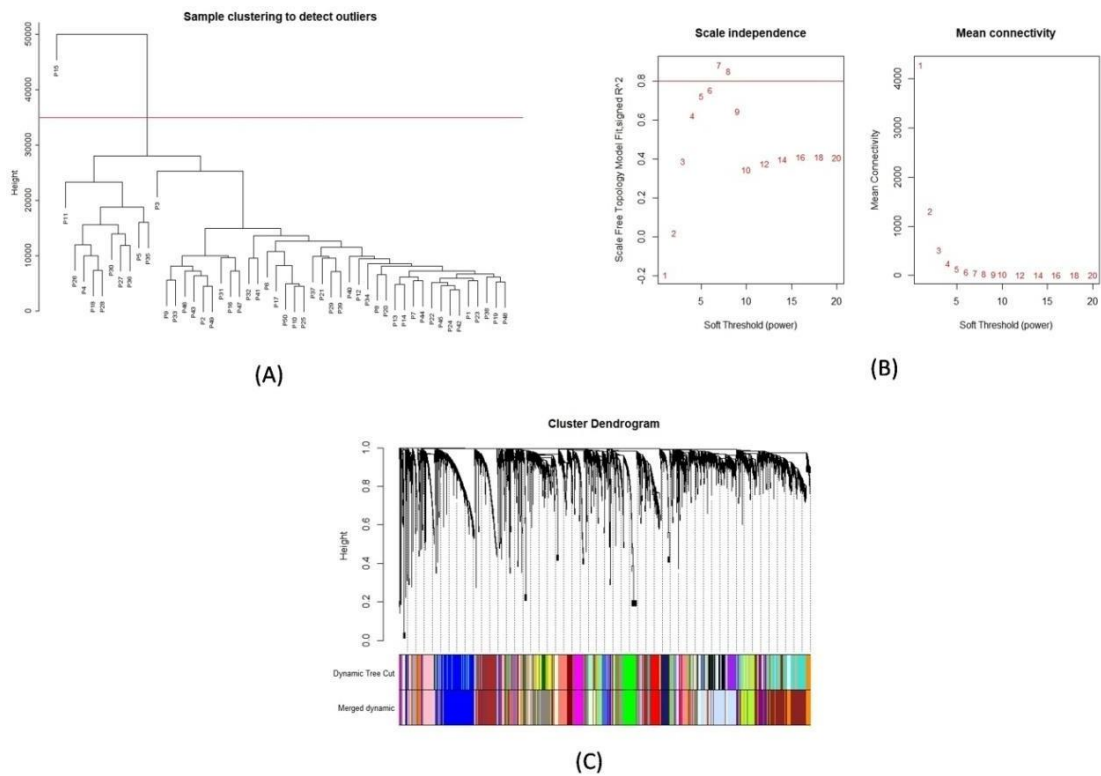

Figure S4: (A – C)

Figure S4. WGCNA network and module detection in TCGA LGG Females: A) Clustering of sample data to detect outliers. B) Determining soft threshold and mean connectivity ( $\beta=7$ ). C) Hierarchical clustering dendrogram of the genes based on topological overlap dissimilarity. Colour coded modules of inter connected genes represents branches of clustering tree.

# CGGA

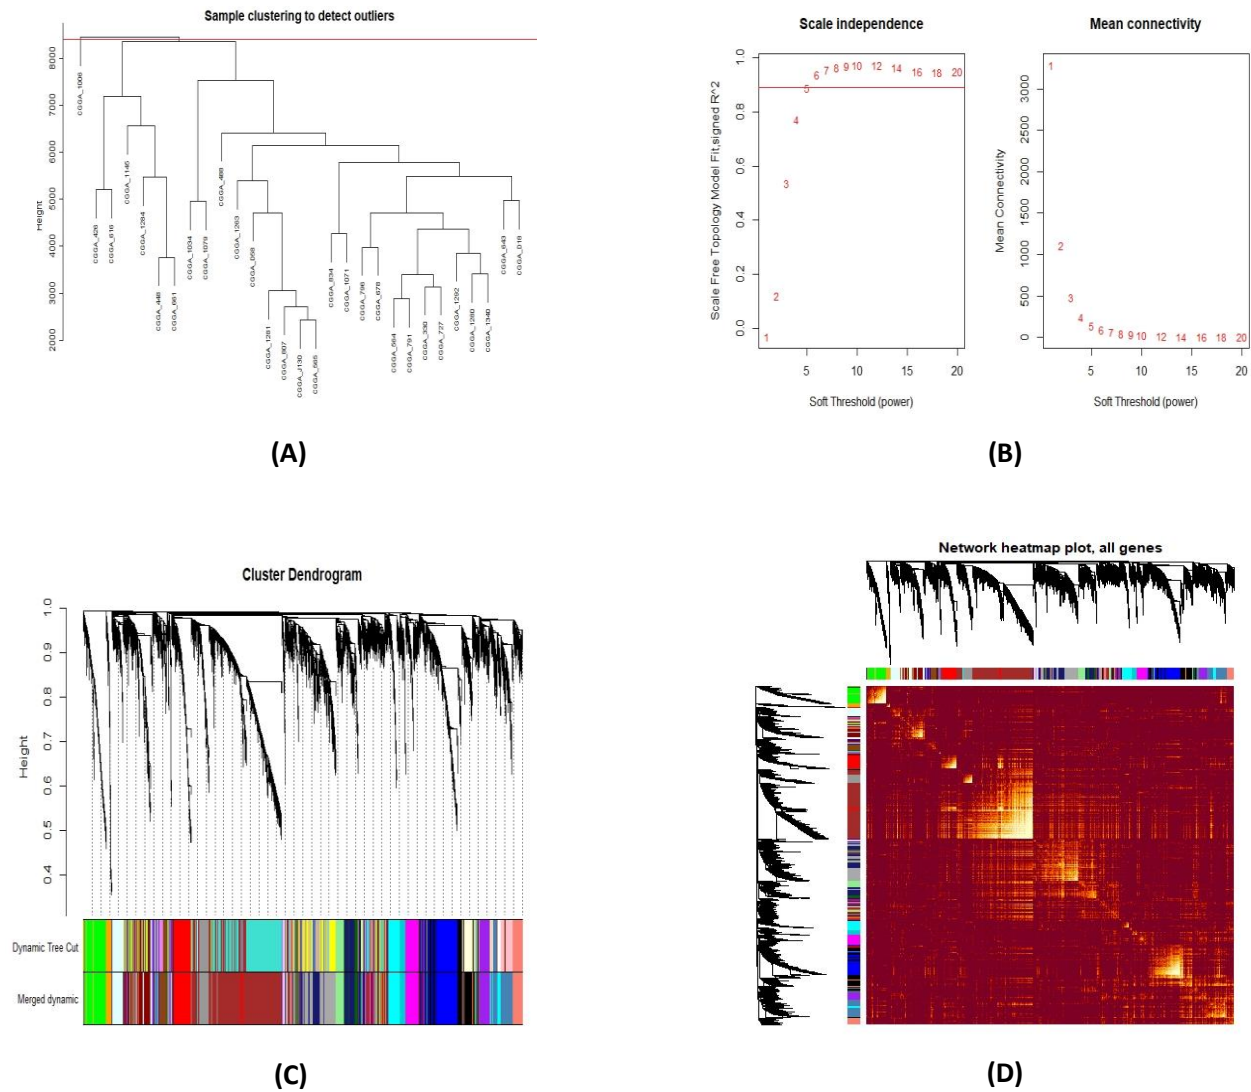

Figure S5: (A-D)

Figure S5. WGCNA network and module detection in CGGA LGG Males: A) Clustering of sample data to detect outliers. B) Determining soft threshold and mean connectivity ( $\beta=5$ ). C) Hierarchical clustering dendrogram of the genes based on topological overlap dissimilarity. Colour coded Modules of inter connected genes represents branches of clustering tree. (D) Network heat map plot of genes in different cluster. Heat map depicts the Topological Overlap Matrix among all genes in the analysis. Dark colour represents low overlap and progressively lighter colour represents higher overlap. Blocks of lighter colour along the diagonal are the modules. (n=29 males).



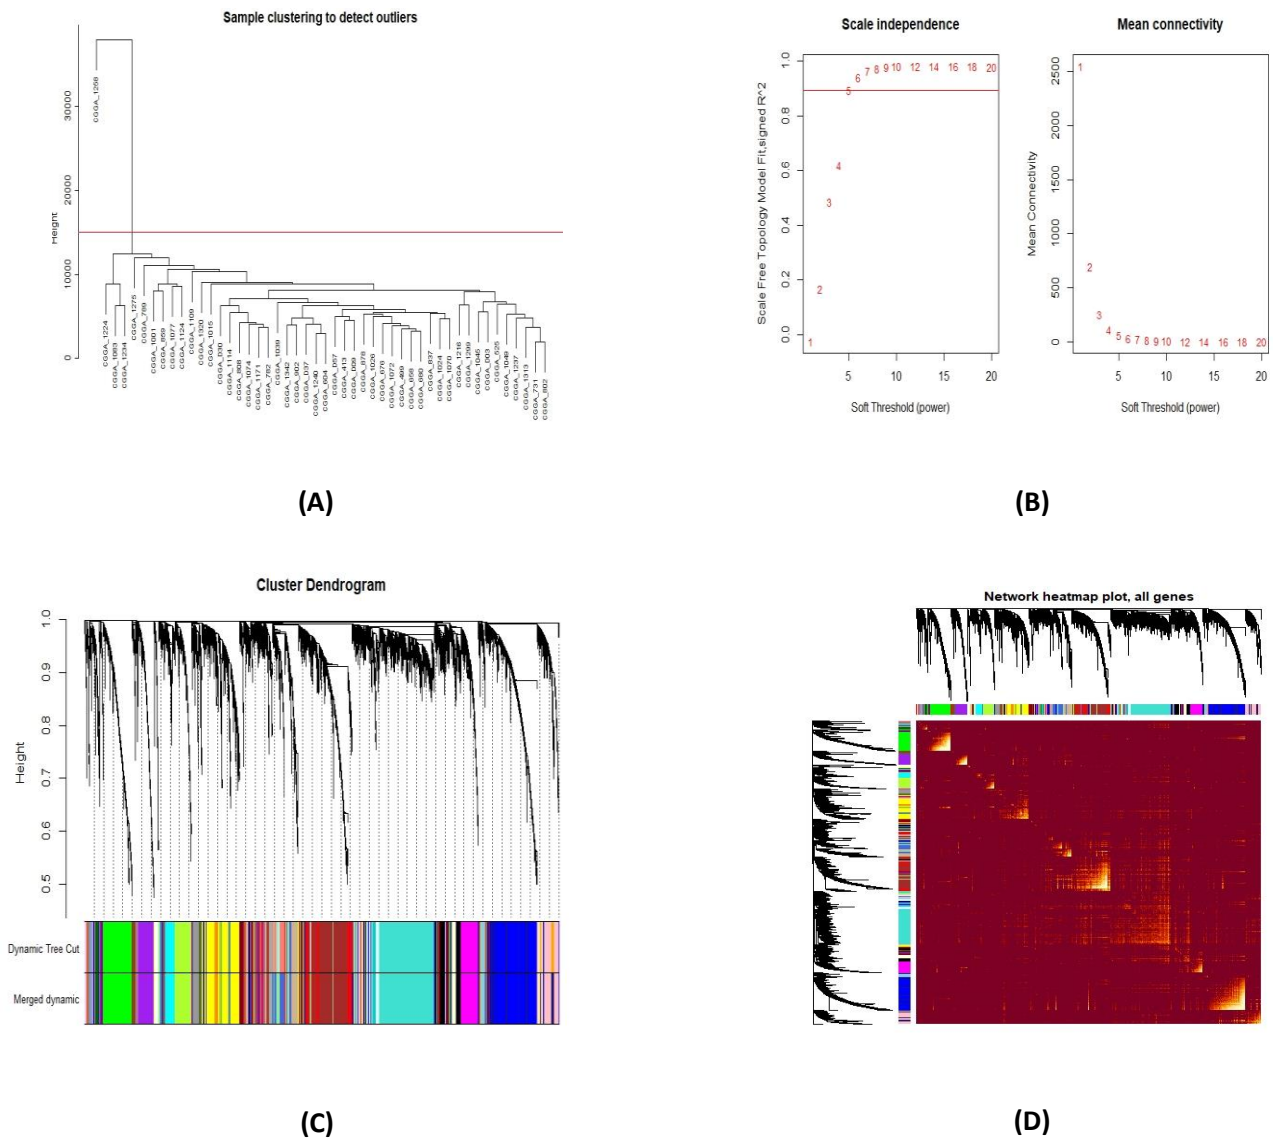

**Figure S7: (A-D)**

Figure S7. WGCNA network and module detection in CGGA GBM Males: A) Clustering of sample data to detect outliers. B) Determining soft threshold and mean connectivity ( $\beta=5$ ). C) Hierarchical clustering dendrogram of the genes based on topological overlap dissimilarity. Color coded Modules of inter connected genes represents branches of clustering tree. (D) Network heat map plot of genes in different cluster. Heat map depicts the Topological Overlap Matrix among all genes in the analysis. Dark colour represents low overlap and progressively lighter colour represents higher overlap. Blocks of lighter colour along the diagonal are the modules. (n= 48 males).

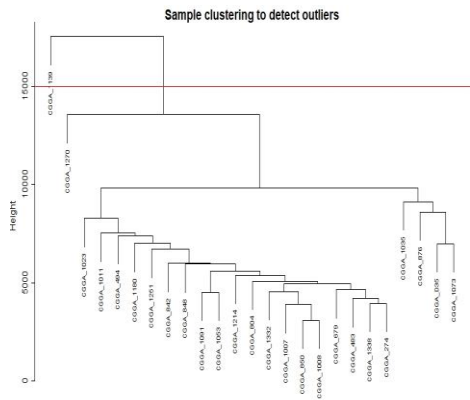

(A)

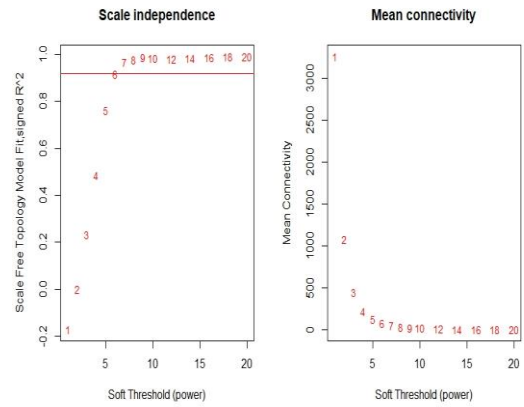

(B)

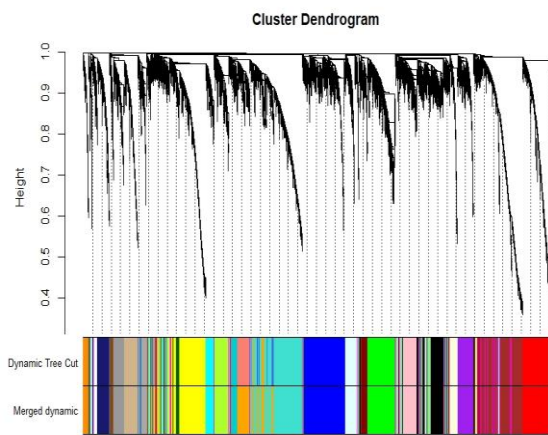

(C)

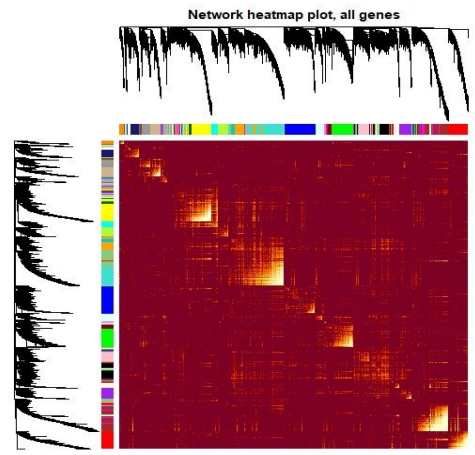

(D)

Figure S8: (A-D)

Figure S8. WGCNA network and module detection in CGGA GBM Females: A) Clustering of sample data to detect outliers. B) Determining soft threshold and mean connectivity ( $\beta=6$ ). C) Hierarchical clustering dendrogram of the genes based on topological overlap dissimilarity. Colour coded Modules of inter connected genes represents branches of clustering tree. (D) Network heat map plot of genes in different cluster. Heat map depicts the Topological Overlap Matrix among all genes in the analysis. Dark colour represents low overlap and progressively lighter colour represents higher overlap. Blocks of lighter colour along the diagonal are the modules. (n= 25 females).



## GBM

| Module | Size | MeDC     | pVal | Top_LOC                     |
|--------|------|----------|------|-----------------------------|
| mod5   | 960  | -0.11622 |      | 0KIF20B, LIMS1, IREB2       |
| mod6   | 721  | -0.08504 |      | 0LRRC7, MACROD2, LYPD6B     |
| mod11  | 522  | -0.09911 |      | 0RHOBTB2, RHOV, REC8        |
| mod14  | 321  | -0.08937 |      | 0SHANK3, SH3BGRL2, SERINC1  |
| mod18  | 184  | -0.13332 |      | 0STOX2, SUPV3L1, STARD4-AS1 |
| mod1   | 2038 | -0.10038 | 0.02 | B4GALT6, ANKS1B, AK3        |
| mod2   | 1802 | -0.08114 | 0.02 | CDH12, CSPG4P1Y, DCAF12L2   |
| mod3   | 1242 | -0.09074 | 0.02 | 3912, 3890, 4053            |
| mod8   | 637  | -0.09808 | 0.02 | NLGN4Y, PABPC1L2A, NXPH2    |
| mod9   | 608  | -0.09451 | 0.02 | PHIP, PLCXD3, PAXBP1-AS1    |
| mod15  | 320  | -0.12151 | 0.02 | SLC24A5, SLC05A1, SLC37A4   |
| Mod19  | 174  | -0.13253 | 0.02 | TACR2, SYNJ1, SYT12         |
| Mod29  | 118  | -0.15734 | 0.02 | VSNL1                       |
| Mod27  | 141  | -0.14724 | 0.06 | UNC79, UBE4A, UNC13B        |
| Mod30  | 109  | -0.08365 | 0.06 |                             |

**Figure S9**

Figure S9. Table showing differentially expressed genes, their significant modules (network) obtained and their ontological significance in males over females in CGGA GBM.

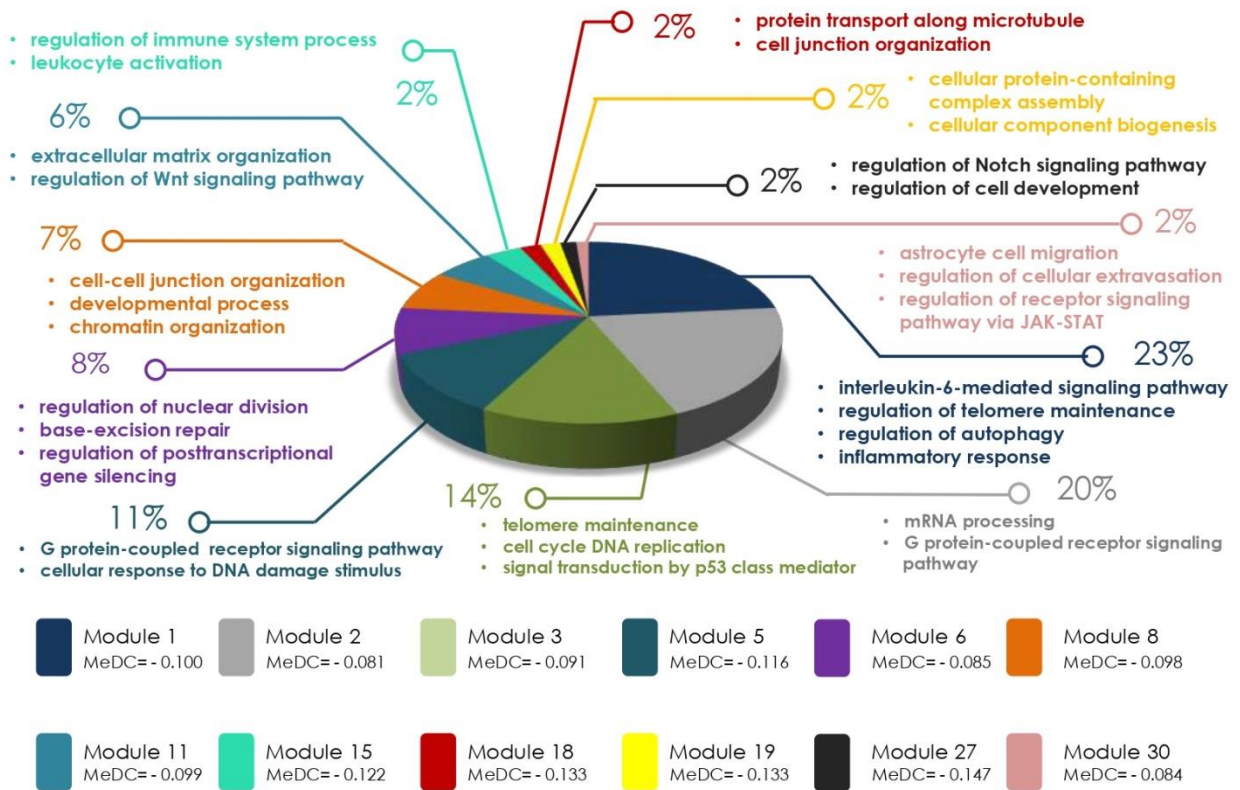

**Figure S10**

Figure S10. Diagram representing modules obtained in CGGA GBM after WGCNA and MDC (Modular Differential connectivity) analysis with significant MeDC (Mean Differential Connectivity) values and their ontological functions. Out of 15 modules with significant MeDC values representing LOC (Loss of connectivity) in males over females, only genes of 12 modules have significant ontological function as assessed by Gene Ontology database.
