# Supplementary material for: Identification of Gender-Specific Molecular Differences in Glioblastoma (GBM) and Low-Grade Glioma (LGG) by the Analysis of Large Transcriptomic and Epigenomic Datasets
Source: Front Oncol. 2021 Sep 21;11:699594. doi: 10.3389/fonc.2021.699594 (PMC8491982; doi:10.3389/fonc.2021.699594)
Supplement: Supplementary file 12 [file Table_11.xlsx]

## Sheet: Sheet1
interactorA_cpdbID	interactorA_name	interactorA_type	interactorA_externalIdentifiers	interactorA_role	interactorB_cpdbID	interactorB_name	interactorB_type	interactorB_externalIdentifiers	interactorB_role	interaction_cpdbIDs	interaction_type	interaction_sourceDBs	interaction_pubmedIds
36496	RPS6KA4	protein	ensembl:ENSG00000162302;ensembl:ENSP00000333896;ensembl:ENSP00000435580;ensembl:ENST00000334205;entrez-gene:8986;hgnc-id:10433;hgnc-symbol:RPS6KA4;hprd:04677;humancyc:HS08656-MONOMER;intact:EBI-21622593;intact:EBI-73933;reactome:R-HSA-437239;reactome:R-HSA-772527;refseq:NM_001006944;refseq:NM_001300802;refseq:NM_001318361;refseq:NM_003942;refseq:NP_001006945;refseq:NP_001287731;refseq:NP_00130529…	activator	125490	KDM5A	protein	dip:DIP-472N;ensembl:ENSP00000382688;entrez-gene:5927;hgnc-id:9886;hgnc-symbol:JARID1A;hprd:08915;intact:EBI-11043810;intact:EBI-1560836;pdb:2JXJ;reactome:R-HSA-3215029;refseq:NM_001042603;refseq:NP_001036068;refseq:NP_005047;uniprot:A8MUS2;uniprot:A8MV76;uniprot:JAD1A_HUMAN;uniprot:KDM5A_HUMAN;uniprot:P29375;uniprot:Q4LE72;uniprot:Q86XZ1	activator	644652	biochemical reaction	Spike
46019	HPRT1	protein	ensembl:ENSG00000165704;ensembl:ENSP00000298556;ensembl:ENST00000298556;entrez-gene:3251;hgnc-id:5157;hprd:02388;humancyc:HS09275-MONOMER;intact:EBI-748210;kegg:hsa:3251;pdb:1BZY;pdb:1D6N;pdb:1HMP;pdb:1Z7G;pdb:2VFA;pdb:3GEP;pdb:3GGC;pdb:3GGJ;pdb:4IJQ;pdb:4KN6;pdb:4RAB;pdb:4RAC;pdb:4RAD;pdb:4RAN;pdb:4RAO;pdb:4RAQ;pdb:5BRN;pdb:5BSK;pdb:5HIA;pdb:5W8V;pdb:6BNJ;reactome:R-HSA-56639;reactome:R-HSA-7421…	enzyme	11009	R5P	compound	cas:4300-28-1;chebi:17797;chebi:52742;chebi:78679;chembl:1235722;chembl:605020;kegg:C00117;reactome:114921;reactome:5696078;reactome:R-ALL-2393950;reactome:R-ALL-73578	product	21555	biochemical reaction	KEGG
434671	SEPTIN6	protein	dip:DIP-38218N;ensembl:ENSG00000125354;ensembl:ENSP00000341524;ensembl:ENSP00000346169;ensembl:ENSP00000353278;ensembl:ENSP00000378108;ensembl:ENSP00000418715;ensembl:ENSP00000435818;ensembl:ENST00000343984;ensembl:ENST00000354228;ensembl:ENST00000360156;ensembl:ENST00000394610;ensembl:ENST00000460411;ensembl:ENST00000489216;entrez-gene:23157;hgnc-id:15848;hgnc-symbol:SEPT6;hprd:06716;intact:EBI-…	physical interactor	529693	q69yn44	protein	ensembl:ENSG00000164944;ensembl:ENSP00000297591;ensembl:ENSP00000398390;ensembl:ENST00000297591;ensembl:ENST00000421249;entrez-gene:25962;hgnc-id:24500;hgnc-symbol:KIAA1429;hprd:10889;intact:EBI-18054817;intact:EBI-21586473;intact:EBI-2819293;refseq:NM_015496;refseq:NM_183009;refseq:NP_056311;refseq:NP_892121;refseq:XM_017013306;refseq:XM_017013307;refseq:XM_017013308;refseq:XP_016868795;uniprot:…	physical interactor	513785	protein interaction	Biogrid	29507755
37795	SH3KBP1	protein	dip:DIP-31803N;ensembl:ENSG00000147010;ensembl:ENSP00000369020;ensembl:ENSP00000369039;ensembl:ENSP00000380921;ensembl:ENST00000379698;ensembl:ENST00000379716;ensembl:ENST00000397821;entrez-gene:30011;hgnc-id:13867;hgnc-symbol:SH3KBP1;hprd:02301;intact:EBI-346595;pdb:2BZ8;pdb:2K6D;pdb:2K9G;pdb:2N64;pdb:2O2O;pdb:2YDL;pdb:5ABS;reactome:R-HSA-182926;reactome:R-HSA-182955;reactome:R-HSA-182957;reacto…	physical interactor	36496	RPS6KA4	protein	ensembl:ENSG00000162302;ensembl:ENSP00000333896;ensembl:ENSP00000435580;ensembl:ENST00000334205;entrez-gene:8986;hgnc-id:10433;hgnc-symbol:RPS6KA4;hprd:04677;humancyc:HS08656-MONOMER;intact:EBI-21622593;intact:EBI-73933;reactome:R-HSA-437239;reactome:R-HSA-772527;refseq:NM_001006944;refseq:NM_001300802;refseq:NM_001318361;refseq:NM_003942;refseq:NP_001006945;refseq:NP_001287731;refseq:NP_00130529…	physical interactor	278661	protein interaction	Biogrid	19531213
14757	RBBP7	protein	dip:DIP-436N;ensembl:ENSG00000102054;ensembl:ENSP00000369424;ensembl:ENSP00000369427;ensembl:ENST00000380084;ensembl:ENST00000380087;entrez-gene:5931;hgnc-id:9890;hgnc-symbol:RBBP7;hprd:04231;intact:EBI-3505029;intact:EBI-352227;pdb:3CFS;pdb:3CFV;reactome:R-HSA-212227;reactome:R-HSA-212300;reactome:R-HSA-2559580;reactome:R-HSA-3214815;reactome:R-HSA-3214841;reactome:R-HSA-3214847;reactome:R-HSA-3…	physical interactor	520267	zn219_human	protein	ensembl:ENSG00000165804;ensembl:ENSP00000354206;ensembl:ENSP00000388558;ensembl:ENSP00000392401;ensembl:ENST00000360947;ensembl:ENST00000421093;ensembl:ENST00000451119;entrez-gene:51222;hgnc-id:13011;hprd:05435;intact:EBI-3937106;refseq:NC_000014;refseq:NM_001101672;refseq:NM_001102454;refseq:NM_016423;refseq:NP_001095142;refseq:NP_001095924;refseq:NP_057507;refseq:XM_005267739;refseq:XM_00672016…	physical interactor	346665	protein interaction	Biogrid	26186194;28514442
46934	MTMR1	protein	ensembl:ENSG00000063601;ensembl:ENSP00000359417;ensembl:ENSP00000414178;ensembl:ENSP00000434105;ensembl:ENST00000370390;ensembl:ENST00000485376;entrez-gene:8776;hgnc-id:7449;hprd:02163;intact:EBI-11320553;intact:EBI-21556035;kegg:hsa:8776;pdb:5C16;reactome:R-HSA-1604647;reactome:R-HSA-1660499;refseq:NC_000023;refseq:NM_001306144;refseq:NM_001306145;refseq:NM_003828;refseq:NP_003819;refseq:XM_0052…	physical interactor	421780	LRRC4C	protein	ensembl:ENSG00000148948;ensembl:ENSP00000278198;ensembl:ENSP00000434761;ensembl:ENSP00000436976;ensembl:ENSP00000437132;ensembl:ENSP00000480903;ensembl:ENST00000278198;ensembl:ENST00000527150;ensembl:ENST00000528697;ensembl:ENST00000530763;ensembl:ENST00000619527;entrez-gene:57689;hgnc-id:29317;hprd:12303;intact:EBI-3925442;pdb:3ZYJ;refseq:NM_001258419;refseq:NM_020929;refseq:NP_001245348;refseq:…	physical interactor	443202	protein interaction	Biogrid	28514442
125511	KDM6A	protein	dip:DIP-46192N;ensembl:ENSG00000147050;ensembl:ENSP00000367203;ensembl:ENSP00000372355;ensembl:ENSP00000437405;ensembl:ENSP00000443078;ensembl:ENSP00000483595;ensembl:ENST00000377967;entrez-gene:7403;hgnc-id:12637;hgnc-symbol:KDM6A;hprd:02131;intact:EBI-4292203;pdb:3AVR;pdb:3AVS;pdb:6FUK;pdb:6FUL;reactome:R-HSA-3214842;reactome:R-HSA-4754224;reactome:R-HSA-5617472;refseq:NM_001291415;refseq:NM_00…	activator	31481	RPS6KA3	protein	dip:DIP-38247N;ensembl:ENSG00000177189;ensembl:ENSP00000368884;ensembl:ENST00000379565;entrez-gene:6197;hgnc-id:10432;hgnc-symbol:RPS6KA3;hprd:02092;humancyc:HS11136-MONOMER;intact:EBI-1046616;pdb:4D9T;pdb:4D9U;pdb:4JG6;pdb:4JG7;pdb:4JG8;pdb:4NUS;pdb:4NW5;pdb:4NW6;pdb:5D9K;pdb:5D9L;reactome:R-HSA-198753;reactome:R-HSA-199830;reactome:R-HSA-199869;reactome:R-HSA-199920;reactome:R-HSA-2559582;react…	activator	644652	biochemical reaction	Spike
81572	CLCN4	protein	ensembl:ENSG00000073464;ensembl:ENSP00000370213;ensembl:ENSP00000501922;ensembl:ENST00000380833;ensembl:ENST00000674669;entrez-gene:1183;intact:EBI-22754239;reactome:R-HSA-2671932;reactome:R-HSA-2672351;refseq:NM_001830;refseq:NP_001243873;refseq:NP_001821;uniprot:A1L3U1;uniprot:B7Z5Z4;uniprot:CLCN4_HUMAN;uniprot:P51793;uniprot:Q9UBU1	physical interactor	53773	ABHD5	protein	ensembl:ENSG00000011198;ensembl:ENSP00000495778;ensembl:ENSP00000497701;ensembl:ENST00000644371;ensembl:ENST00000649763;entrez-gene:51099;hgnc-id:21396;hprd:05308;hprd:11986;humancyc:HS00306-MONOMER;intact:EBI-2813554;reactome:R-HSA-163485;reactome:R-HSA-163531;reactome:R-HSA-163560;refseq:NM_016006;refseq:NP_057090;refseq:XM_011533780;unigene:19385;uniprot:ABHD5_HUMAN;uniprot:B2R9K0;uniprot:Q8WT…	physical interactor	68276	protein interaction	IntAct	unassigned1304
71122	EIF2S3	protein	ensembl:ENSG00000130741;ensembl:ENSP00000253039;ensembl:ENST00000253039;entrez-gene:1968;hgnc-id:3267;hgnc-symbol:EIF2S3;hprd:02155;intact:EBI-1054228;intact:EBI-11602611;pdb:6FEC;pdb:6K71;pdb:6K72;pdb:6O81;pdb:6O85;pdb:6YBV;pdb:6ZMW;pdb:6ZP4;pdb:7A09;reactome:R-HSA-156827;reactome:R-HSA-381042;reactome:R-HSA-382556;reactome:R-HSA-72514;reactome:R-HSA-72649;reactome:R-HSA-72695;reactome:R-HSA-727…	physical interactor	7872	IMPDH2	protein	ensembl:ENSG00000178035;ensembl:ENSP00000321584;ensembl:ENST00000326739;entrez-gene:3615;hgnc-id:6053;hgnc-symbol:IMPDH2;hprd:00895;humancyc:HS11242-MONOMER;intact:EBI-353389;kegg:hsa:3615;pdb:1B3O;pdb:1NF7;pdb:1NFB;pdb:6I0M;pdb:6I0O;pdb:6U8E;pdb:6U8N;pdb:6U8R;pdb:6U8S;pdb:6U9O;pdb:6UA2;pdb:6UA4;pdb:6UA5;pdb:6UAJ;pdb:6UC2;pdb:6UDO;pdb:6UDP;pdb:6UDQ;reactome:R-HSA-57350;reactome:R-HSA-6798695;reac…	physical interactor	322230	protein interaction	Biogrid	22863883
217729	CDKL5	protein	ensembl:ENSG00000008086;ensembl:ENSP00000369325;ensembl:ENSP00000369332;ensembl:ENSP00000485244;ensembl:ENST00000379989;ensembl:ENST00000379996;ensembl:ENST00000623535;entrez-gene:6792;hgnc-id:11411;hprd:02190;humancyc:HS00230-MONOMER;intact:EBI-1752465;pdb:4BGQ;refseq:NM_001037343;refseq:NM_003159;refseq:NP_001032420;refseq:NP_001310218;refseq:NP_003150;refseq:XM_005274584;refseq:XM_005274585;re…	enzyme	31481	RPS6KA3	protein	dip:DIP-38247N;ensembl:ENSG00000177189;ensembl:ENSP00000368884;ensembl:ENST00000379565;entrez-gene:6197;hgnc-id:10432;hgnc-symbol:RPS6KA3;hprd:02092;humancyc:HS11136-MONOMER;intact:EBI-1046616;pdb:4D9T;pdb:4D9U;pdb:4JG6;pdb:4JG7;pdb:4JG8;pdb:4NUS;pdb:4NW5;pdb:4NW6;pdb:5D9K;pdb:5D9L;reactome:R-HSA-198753;reactome:R-HSA-199830;reactome:R-HSA-199869;reactome:R-HSA-199920;reactome:R-HSA-2559582;react…	enzyme	29236	biochemical reaction	HumanCyc	10662544;8774846
7739	PPAT	protein	ensembl:ENSG00000128059;ensembl:ENSP00000264220;ensembl:ENST00000264220;entrez-gene:5471;hgnc-id:9238;hprd:01402;humancyc:HS05157-MONOMER;intact:EBI-3920254;kegg:hsa:5471;reactome:R-HSA-62496;reactome:R-HSA-73817;refseq:NM_002703;refseq:NP_002694;refseq:XM_011534387;unigene:311;uniprot:A8K4H7;uniprot:PUR1_HUMAN;uniprot:Q06203;uniprot:Q59G63	physical interactor	7872	IMPDH2	protein	ensembl:ENSG00000178035;ensembl:ENSP00000321584;ensembl:ENST00000326739;entrez-gene:3615;hgnc-id:6053;hgnc-symbol:IMPDH2;hprd:00895;humancyc:HS11242-MONOMER;intact:EBI-353389;kegg:hsa:3615;pdb:1B3O;pdb:1NF7;pdb:1NFB;pdb:6I0M;pdb:6I0O;pdb:6U8E;pdb:6U8N;pdb:6U8R;pdb:6U8S;pdb:6U9O;pdb:6UA2;pdb:6UA4;pdb:6UA5;pdb:6UAJ;pdb:6UC2;pdb:6UDO;pdb:6UDP;pdb:6UDQ;reactome:R-HSA-57350;reactome:R-HSA-6798695;reac…	physical interactor	371044	protein interaction	Biogrid	26344197
507245	rmc1_human	protein	ensembl:ENSG00000141452;ensembl:ENSP00000269221;ensembl:ENSP00000482573;ensembl:ENST00000269221;entrez-gene:29919;hgnc-id:24326;hprd:12693;intact:EBI-2804848;refseq:NM_001276342;refseq:NM_001318707;refseq:NM_001318708;refseq:NM_001318709;refseq:NM_013326;refseq:NP_001305636;refseq:NP_001305637;refseq:NP_001305638;refseq:NP_037458;refseq:XM_006722445;refseq:XM_011525939;refseq:XM_017025717;refseq:…	physical interactor	124144	GEMIN5	protein	ensembl:ENSG00000082516;ensembl:ENSP00000285873;ensembl:ENST00000285873;entrez-gene:25929;hgnc-id:20043;hgnc-symbol:GEMIN5;hprd:06109;intact:EBI-443630;pdb:5GXH;pdb:5GXI;pdb:5H1J;pdb:5H1K;pdb:5H1L;pdb:5H1M;pdb:5H3S;pdb:5H3T;pdb:5H3U;pdb:5TEE;pdb:5TEF;pdb:5THA;pdb:6RNQ;pdb:6RNS;reactome:R-HSA-191765;reactome:R-HSA-191833;reactome:R-HSA-191859;refseq:NM_001252156;refseq:NM_015465;refseq:NP_00123908…	physical interactor	626968	protein interaction	Biogrid	33144569
124144	GEMIN5	protein	ensembl:ENSG00000082516;ensembl:ENSP00000285873;ensembl:ENST00000285873;entrez-gene:25929;hgnc-id:20043;hgnc-symbol:GEMIN5;hprd:06109;intact:EBI-443630;pdb:5GXH;pdb:5GXI;pdb:5H1J;pdb:5H1K;pdb:5H1L;pdb:5H1M;pdb:5H3S;pdb:5H3T;pdb:5H3U;pdb:5TEE;pdb:5TEF;pdb:5THA;pdb:6RNQ;pdb:6RNS;reactome:R-HSA-191765;reactome:R-HSA-191833;reactome:R-HSA-191859;refseq:NM_001252156;refseq:NM_015465;refseq:NP_00123908…	physical interactor	11376	SNRPG	protein	dip:DIP-34627N;ensembl:ENSG00000143977;ensembl:ENSP00000272348;ensembl:ENST00000272348;entrez-gene:6637;hgnc-id:11163;hprd:04646;intact:EBI-1056206;intact:EBI-624585;pdb:3CW1;pdb:3JCR;pdb:3PGW;pdb:4F7U;pdb:4PJO;pdb:4V98;pdb:4WZJ;pdb:5MQF;pdb:5O9Z;pdb:5XJC;pdb:5XJL;pdb:5XJQ;pdb:5XJR;pdb:5XJT;pdb:5XJU;pdb:5YZG;pdb:5Z56;pdb:5Z57;pdb:5Z58;pdb:6AH0;pdb:6AHD;pdb:6FF7;pdb:6ICZ;pdb:6ID0;pdb:6ID1;pdb:6QDV…	physical interactor	257942	protein interaction	Biogrid	11714716;28514442
482298	HTATSF1	protein	dip:DIP-42095N;ensembl:ENSG00000102241;ensembl:ENSP00000218364;ensembl:ENSP00000442699;ensembl:ENST00000218364;ensembl:ENST00000535601;entrez-gene:27336;hgnc-id:5276;hgnc-symbol:HTATSF1;hprd:02282;intact:EBI-720468;pdb:2DIT;pdb:6N3D;pdb:6N3E;pdb:6N3F;pdb:6NSX;pdb:6Y50;pdb:6Y53;pdb:6Y5Q;refseq:NM_001163280;refseq:NM_014500;refseq:NP_001156752;refseq:NP_055315;refseq:XM_005262404;refseq:XP_00526246…	physical interactor	56151	ZNF512B	protein	ensembl:ENSG00000196700;ensembl:ENSP00000358904;ensembl:ENST00000369888;entrez-gene:57473;hgnc-id:29212;hgnc-symbol:GM632;hgnc-symbol:ZNF512B;hprd:13840;intact:EBI-1049952;pdb:2GQJ;reactome:R-HSA-9715175;refseq:NM_020713;refseq:NP_065764;refseq:XM_005260226;refseq:XM_011528929;refseq:XM_011528930;refseq:XM_011528931;refseq:XM_011528932;refseq:XM_011528933;refseq:XP_011527231;refseq:XP_028968;unip…	physical interactor	131675	protein interaction	BIND;Biogrid;IntAct;MINT;Spike	15231748
3484282	SMIM10L2B	rna	entrez-gene:644596;hgnc-id:34500	physical interactor	529693	q69yn44	protein	ensembl:ENSG00000164944;ensembl:ENSP00000297591;ensembl:ENSP00000398390;ensembl:ENST00000297591;ensembl:ENST00000421249;entrez-gene:25962;hgnc-id:24500;hgnc-symbol:KIAA1429;hprd:10889;intact:EBI-18054817;intact:EBI-21586473;intact:EBI-2819293;refseq:NM_015496;refseq:NM_183009;refseq:NP_056311;refseq:NP_892121;refseq:XM_017013306;refseq:XM_017013307;refseq:XM_017013308;refseq:XP_016868795;uniprot:…	physical interactor	512649	protein interaction	Biogrid	29507755
37795	SH3KBP1	protein	dip:DIP-31803N;ensembl:ENSG00000147010;ensembl:ENSP00000369020;ensembl:ENSP00000369039;ensembl:ENSP00000380921;ensembl:ENST00000379698;ensembl:ENST00000379716;ensembl:ENST00000397821;entrez-gene:30011;hgnc-id:13867;hgnc-symbol:SH3KBP1;hprd:02301;intact:EBI-346595;pdb:2BZ8;pdb:2K6D;pdb:2K9G;pdb:2N64;pdb:2O2O;pdb:2YDL;pdb:5ABS;reactome:R-HSA-182926;reactome:R-HSA-182955;reactome:R-HSA-182957;reacto…	physical interactor	70925	HSPH1	protein	ensembl:ENSG00000120694;ensembl:ENSP00000318687;ensembl:ENSP00000369768;ensembl:ENSP00000396090;ensembl:ENSP00000487365;ensembl:ENST00000320027;ensembl:ENST00000380405;ensembl:ENST00000630972;entrez-gene:10808;hgnc-id:16969;hgnc-symbol:HSPH1;hprd:09990;intact:EBI-2859494;intact:EBI-356829;pdb:6GFA;reactome:R-HSA-3000484;reactome:R-HSA-3221883;reactome:R-HSA-3221904;reactome:R-HSA-3299412;reactome…	physical interactor	578829	protein interaction	Biogrid	31980649
367571	NUP62CL	protein	ensembl:ENSG00000198088;ensembl:ENSP00000361544;ensembl:ENSP00000433269;ensembl:ENST00000372466;ensembl:ENST00000484614;entrez-gene:54830;hgnc-id:25960;hprd:06527;intact:EBI-751933;refseq:NM_017681;refseq:NP_060151;uniprot:D3DUX4;uniprot:N62CL_HUMAN;uniprot:Q8WVL6;uniprot:Q9H1M0;uniprot:Q9NXP2	enzyme	314534	KPNA6	protein	dip:DIP-27609N;ensembl:ENSG00000025800;ensembl:ENSP00000362728;ensembl:ENST00000373625;entrez-gene:23633;hgnc-id:6399;hgnc-symbol:KPNA6;hprd:09465;intact:EBI-359923;pdb:4UAD;refseq:NM_012316;refseq:NP_036448;refseq:XM_005270711;uniprot:B2RDC7;uniprot:D3DPP5;uniprot:IMA7_HUMAN;uniprot:O60684;uniprot:Q5VVU3	enzyme	44549	biochemical reaction	EHMN
233943	CaM/Ca2+/Calcineurin A alpha-beta B1	complex		transcription factor	242536	RNF128	gene	entrez-gene:79589;uniprot:Q8TEB7	transcribed gene	34320	gene regulatory interaction	PID	12705856;14973438
217729	CDKL5	protein	ensembl:ENSG00000008086;ensembl:ENSP00000369325;ensembl:ENSP00000369332;ensembl:ENSP00000485244;ensembl:ENST00000379989;ensembl:ENST00000379996;ensembl:ENST00000623535;entrez-gene:6792;hgnc-id:11411;hprd:02190;humancyc:HS00230-MONOMER;intact:EBI-1752465;pdb:4BGQ;refseq:NM_001037343;refseq:NM_003159;refseq:NP_001032420;refseq:NP_001310218;refseq:NP_003150;refseq:XM_005274584;refseq:XM_005274585;re…	enzyme	36496	RPS6KA4	protein	ensembl:ENSG00000162302;ensembl:ENSP00000333896;ensembl:ENSP00000435580;ensembl:ENST00000334205;entrez-gene:8986;hgnc-id:10433;hgnc-symbol:RPS6KA4;hprd:04677;humancyc:HS08656-MONOMER;intact:EBI-21622593;intact:EBI-73933;reactome:R-HSA-437239;reactome:R-HSA-772527;refseq:NM_001006944;refseq:NM_001300802;refseq:NM_001318361;refseq:NM_003942;refseq:NP_001006945;refseq:NP_001287731;refseq:NP_00130529…	enzyme	29236;42935;43208	biochemical reaction	EHMN;HumanCyc	10662544;8774846
314534	KPNA6	protein	dip:DIP-27609N;ensembl:ENSG00000025800;ensembl:ENSP00000362728;ensembl:ENST00000373625;entrez-gene:23633;hgnc-id:6399;hgnc-symbol:KPNA6;hprd:09465;intact:EBI-359923;pdb:4UAD;refseq:NM_012316;refseq:NP_036448;refseq:XM_005270711;uniprot:B2RDC7;uniprot:D3DPP5;uniprot:IMA7_HUMAN;uniprot:O60684;uniprot:Q5VVU3	physical interactor	492429	sr1ip_human	protein	ensembl:ENSG00000153006;ensembl:ENSP00000427401;ensembl:ENST00000513458;entrez-gene:285672;hgnc-id:26716;hprd:08210;intact:EBI-10268630;refseq:NM_173829;refseq:NP_776190;uniprot:Q32NC8;uniprot:Q8N9Q2;uniprot:SR1IP_HUMAN	physical interactor	441557	protein interaction	Biogrid	28514442
58641	OFD1	protein	dip:DIP-60601N;ensembl:ENSG00000046651;ensembl:ENSP00000344314;ensembl:ENSP00000369923;ensembl:ENSP00000369941;ensembl:ENST00000340096;ensembl:ENST00000380550;entrez-gene:8481;hgnc-id:2567;hgnc-symbol:OFD1;hprd:02162;intact:EBI-21504069;intact:EBI-716327;reactome:R-HSA-2565942;reactome:R-HSA-380259;reactome:R-HSA-380270;reactome:R-HSA-380284;reactome:R-HSA-380318;reactome:R-HSA-380320;reactome:R-…	physical interactor	7872	IMPDH2	protein	ensembl:ENSG00000178035;ensembl:ENSP00000321584;ensembl:ENST00000326739;entrez-gene:3615;hgnc-id:6053;hgnc-symbol:IMPDH2;hprd:00895;humancyc:HS11242-MONOMER;intact:EBI-353389;kegg:hsa:3615;pdb:1B3O;pdb:1NF7;pdb:1NFB;pdb:6I0M;pdb:6I0O;pdb:6U8E;pdb:6U8N;pdb:6U8R;pdb:6U8S;pdb:6U9O;pdb:6UA2;pdb:6UA4;pdb:6UA5;pdb:6UAJ;pdb:6UC2;pdb:6UDO;pdb:6UDP;pdb:6UDQ;reactome:R-HSA-57350;reactome:R-HSA-6798695;reac…	physical interactor	383553	protein interaction	Biogrid	26638075
233140	TXLNG	protein	ensembl:ENSG00000086712;ensembl:ENSP00000369465;ensembl:ENSP00000381222;ensembl:ENST00000380122;ensembl:ENST00000398155;entrez-gene:55787;hgnc-id:18578;hprd:06478;intact:EBI-3445062;refseq:NM_001168683;refseq:NM_018360;refseq:NP_001162154;refseq:NP_060830;refseq:XM_005274558;refseq:XM_017029631;refseq:XP_016885120;uniprot:Q2KQ75;uniprot:Q5JNZ7;uniprot:Q9NUQ3;uniprot:Q9P0X1;uniprot:TXLNG_HUMAN	physical interactor	55664	WIPF2	protein	ensembl:ENSG00000171475;ensembl:ENSP00000320924;ensembl:ENSP00000462350;ensembl:ENSP00000462826;ensembl:ENST00000323571;ensembl:ENST00000583130;ensembl:ENST00000585043;entrez-gene:147179;hgnc-id:30923;hprd:18304;intact:EBI-2850112;reactome:R-HSA-2029482;reactome:R-HSA-2197666;reactome:R-HSA-5663213;reactome:R-HSA-9664422;refseq:NM_133264;refseq:NP_573571;refseq:XM_005257083;refseq:XM_005257084;re…	physical interactor	296944	protein interaction	Biogrid	22939629
71122	EIF2S3	protein	ensembl:ENSG00000130741;ensembl:ENSP00000253039;ensembl:ENST00000253039;entrez-gene:1968;hgnc-id:3267;hgnc-symbol:EIF2S3;hprd:02155;intact:EBI-1054228;intact:EBI-11602611;pdb:6FEC;pdb:6K71;pdb:6K72;pdb:6O81;pdb:6O85;pdb:6YBV;pdb:6ZMW;pdb:6ZP4;pdb:7A09;reactome:R-HSA-156827;reactome:R-HSA-381042;reactome:R-HSA-382556;reactome:R-HSA-72514;reactome:R-HSA-72649;reactome:R-HSA-72695;reactome:R-HSA-727…	physical interactor	507245	rmc1_human	protein	ensembl:ENSG00000141452;ensembl:ENSP00000269221;ensembl:ENSP00000482573;ensembl:ENST00000269221;entrez-gene:29919;hgnc-id:24326;hprd:12693;intact:EBI-2804848;refseq:NM_001276342;refseq:NM_001318707;refseq:NM_001318708;refseq:NM_001318709;refseq:NM_013326;refseq:NP_001305636;refseq:NP_001305637;refseq:NP_001305638;refseq:NP_037458;refseq:XM_006722445;refseq:XM_011525939;refseq:XM_017025717;refseq:…	physical interactor	626892	protein interaction	Biogrid	33144569
232905	TCF4/beta catenin	complex		transcription factor	248428	ZCCHC12	protein	ensembl:ENSG00000174460;ensembl:ENSP00000308921;ensembl:ENST00000310164;entrez-gene:170261;hgnc-id:27273;hprd:06616;intact:EBI-748373;refseq:NM_001312891;refseq:NM_173798;refseq:NP_001299820;refseq:NP_776159;uniprot:B3KV48;uniprot:Q6PEW1;uniprot:Q6PID5;uniprot:Q8N1C1;uniprot:ZCH12_HUMAN	product	34339	gene regulatory interaction	PID	19816403;20128690
52413	UBA1	protein	dip:DIP-33686N;ensembl:ENSG00000130985;ensembl:ENSP00000338413;ensembl:ENSP00000366568;ensembl:ENST00000335972;ensembl:ENST00000377351;entrez-gene:7317;hgnc-id:12469;hgnc-symbol:UBA1;hgnc-symbol:UBE1;hprd:02440;humancyc:HS05465-MONOMER;intact:EBI-709688;pdb:4P22;pdb:6DC6;reactome:R-HSA-8852116;reactome:R-HSA-8866652;reactome:R-HSA-947698;reactome:R-HSA-983168;refseq:NM_003334;refseq:NM_153280;ref…	physical interactor	28606	CTPS1	protein	ensembl:ENSG00000171793;ensembl:ENSP00000361699;ensembl:ENSP00000361704;ensembl:ENSP00000497602;ensembl:ENSP00000497744;ensembl:ENST00000372616;ensembl:ENST00000649124;ensembl:ENST00000650070;entrez-gene:1503;hgnc-id:2519;hgnc-symbol:CTPS1;hprd:00465;humancyc:HS10382-MONOMER;intact:EBI-1042983;kegg:hsa:1503;pdb:2VO1;pdb:5U03;reactome:R-HSA-499943;reactome:R-HSA-73536;refseq:NM_001301237;refseq:NM…	physical interactor	320934	protein interaction	Biogrid	22863883
217729	CDKL5	protein	ensembl:ENSG00000008086;ensembl:ENSP00000369325;ensembl:ENSP00000369332;ensembl:ENSP00000485244;ensembl:ENST00000379989;ensembl:ENST00000379996;ensembl:ENST00000623535;entrez-gene:6792;hgnc-id:11411;hprd:02190;humancyc:HS00230-MONOMER;intact:EBI-1752465;pdb:4BGQ;refseq:NM_001037343;refseq:NM_003159;refseq:NP_001032420;refseq:NP_001310218;refseq:NP_003150;refseq:XM_005274584;refseq:XM_005274585;re…	physical interactor	76170	SERPINB8	protein	ensembl:ENSG00000166401;ensembl:ENSP00000331368;ensembl:ENSP00000381072;ensembl:ENSP00000381075;ensembl:ENSP00000438328;ensembl:ENST00000353706;ensembl:ENST00000397985;ensembl:ENST00000397988;ensembl:ENST00000542677;entrez-gene:5271;hgnc-id:8952;hprd:03412;intact:EBI-20839968;intact:EBI-6916752;reactome:R-HSA-2990856;reactome:R-HSA-75205;refseq:NC_000018;refseq:NM_001031848;refseq:NM_001276490;re…	physical interactor	363760	protein interaction	Biogrid	26186194;28514442
37795	SH3KBP1	protein	dip:DIP-31803N;ensembl:ENSG00000147010;ensembl:ENSP00000369020;ensembl:ENSP00000369039;ensembl:ENSP00000380921;ensembl:ENST00000379698;ensembl:ENST00000379716;ensembl:ENST00000397821;entrez-gene:30011;hgnc-id:13867;hgnc-symbol:SH3KBP1;hprd:02301;intact:EBI-346595;pdb:2BZ8;pdb:2K6D;pdb:2K9G;pdb:2N64;pdb:2O2O;pdb:2YDL;pdb:5ABS;reactome:R-HSA-182926;reactome:R-HSA-182955;reactome:R-HSA-182957;reacto…	physical interactor	520267	zn219_human	protein	ensembl:ENSG00000165804;ensembl:ENSP00000354206;ensembl:ENSP00000388558;ensembl:ENSP00000392401;ensembl:ENST00000360947;ensembl:ENST00000421093;ensembl:ENST00000451119;entrez-gene:51222;hgnc-id:13011;hprd:05435;intact:EBI-3937106;refseq:NC_000014;refseq:NM_001101672;refseq:NM_001102454;refseq:NM_016423;refseq:NP_001095142;refseq:NP_001095924;refseq:NP_057507;refseq:XM_005267739;refseq:XM_00672016…	physical interactor	179361	protein interaction	Biogrid;IntAct;MINT	21900206
11023	PRPS2	protein	ensembl:ENSG00000101911;ensembl:ENSP00000370043;ensembl:ENSP00000381504;ensembl:ENST00000380668;ensembl:ENST00000398491;entrez-gene:5634;hgnc-id:9465;hprd:02414;humancyc:HS02317-MONOMER;intact:EBI-12063547;intact:EBI-4290895;kegg:hsa:5634;reactome:R-HSA-58224;reactome:R-HSA-73843;refseq:NM_001039091;refseq:NM_002765;refseq:NP_001034180;refseq:NP_002756;unigene:2910;uniprot:P11908;uniprot:PRPS2_HU…	activator	11009	R5P	compound	cas:4300-28-1;chebi:17797;chebi:52742;chebi:78679;chembl:1235722;chembl:605020;kegg:C00117;reactome:114921;reactome:5696078;reactome:R-ALL-2393950;reactome:R-ALL-73578	product	784	biochemical reaction	EHMN;INOH;KEGG;Reactome	4328836
677948	ANKRD11	protein	ensembl:ENSG00000167522;ensembl:ENSP00000301030;ensembl:ENSP00000367581;ensembl:ENSP00000495226;ensembl:ENST00000301030;ensembl:ENST00000378330;ensembl:ENST00000642600;entrez-gene:29123;hgnc-id:21316;hgnc-symbol:ANKRD11;hprd:12456;intact:EBI-2808987;refseq:NM_001256182;refseq:NM_001256183;refseq:NM_013275;refseq:NP_001243111;refseq:NP_001243112;refseq:NP_037407;refseq:XM_006721181;refseq:XM_00672…	physical interactor	58659	HAUS3	protein	dip:DIP-48832N;ensembl:ENSG00000214367;ensembl:ENSP00000243706;ensembl:ENSP00000392903;ensembl:ENSP00000427350;ensembl:ENSP00000500512;ensembl:ENST00000243706;ensembl:ENST00000443786;ensembl:ENST00000506763;ensembl:ENST00000672739;entrez-gene:79441;hgnc-id:28719;hprd:10784;intact:EBI-2558217;pdb:6PTB;pdb:6PTE;reactome:R-HSA-2565942;reactome:R-HSA-380259;reactome:R-HSA-380270;reactome:R-HSA-380284…	physical interactor	559364	protein interaction	Biogrid	32296183
58641	OFD1	protein	dip:DIP-60601N;ensembl:ENSG00000046651;ensembl:ENSP00000344314;ensembl:ENSP00000369923;ensembl:ENSP00000369941;ensembl:ENST00000340096;ensembl:ENST00000380550;entrez-gene:8481;hgnc-id:2567;hgnc-symbol:OFD1;hprd:02162;intact:EBI-21504069;intact:EBI-716327;reactome:R-HSA-2565942;reactome:R-HSA-380259;reactome:R-HSA-380270;reactome:R-HSA-380284;reactome:R-HSA-380318;reactome:R-HSA-380320;reactome:R-…	physical interactor	58659	HAUS3	protein	dip:DIP-48832N;ensembl:ENSG00000214367;ensembl:ENSP00000243706;ensembl:ENSP00000392903;ensembl:ENSP00000427350;ensembl:ENSP00000500512;ensembl:ENST00000243706;ensembl:ENST00000443786;ensembl:ENST00000506763;ensembl:ENST00000672739;entrez-gene:79441;hgnc-id:28719;hprd:10784;intact:EBI-2558217;pdb:6PTB;pdb:6PTE;reactome:R-HSA-2565942;reactome:R-HSA-380259;reactome:R-HSA-380270;reactome:R-HSA-380284…	physical interactor	383796	protein interaction	Biogrid	26638075
52413	UBA1	protein	dip:DIP-33686N;ensembl:ENSG00000130985;ensembl:ENSP00000338413;ensembl:ENSP00000366568;ensembl:ENST00000335972;ensembl:ENST00000377351;entrez-gene:7317;hgnc-id:12469;hgnc-symbol:UBA1;hgnc-symbol:UBE1;hprd:02440;humancyc:HS05465-MONOMER;intact:EBI-709688;pdb:4P22;pdb:6DC6;reactome:R-HSA-8852116;reactome:R-HSA-8866652;reactome:R-HSA-947698;reactome:R-HSA-983168;refseq:NM_003334;refseq:NM_153280;ref…	physical interactor	70925	HSPH1	protein	ensembl:ENSG00000120694;ensembl:ENSP00000318687;ensembl:ENSP00000369768;ensembl:ENSP00000396090;ensembl:ENSP00000487365;ensembl:ENST00000320027;ensembl:ENST00000380405;ensembl:ENST00000630972;entrez-gene:10808;hgnc-id:16969;hgnc-symbol:HSPH1;hprd:09990;intact:EBI-2859494;intact:EBI-356829;pdb:6GFA;reactome:R-HSA-3000484;reactome:R-HSA-3221883;reactome:R-HSA-3221904;reactome:R-HSA-3299412;reactome…	physical interactor	249560	protein interaction	Biogrid;HPRD;Spike	14733918;16713569
37795	SH3KBP1	protein	dip:DIP-31803N;ensembl:ENSG00000147010;ensembl:ENSP00000369020;ensembl:ENSP00000369039;ensembl:ENSP00000380921;ensembl:ENST00000379698;ensembl:ENST00000379716;ensembl:ENST00000397821;entrez-gene:30011;hgnc-id:13867;hgnc-symbol:SH3KBP1;hprd:02301;intact:EBI-346595;pdb:2BZ8;pdb:2K6D;pdb:2K9G;pdb:2N64;pdb:2O2O;pdb:2YDL;pdb:5ABS;reactome:R-HSA-182926;reactome:R-HSA-182955;reactome:R-HSA-182957;reacto…	physical interactor	7872	IMPDH2	protein	ensembl:ENSG00000178035;ensembl:ENSP00000321584;ensembl:ENST00000326739;entrez-gene:3615;hgnc-id:6053;hgnc-symbol:IMPDH2;hprd:00895;humancyc:HS11242-MONOMER;intact:EBI-353389;kegg:hsa:3615;pdb:1B3O;pdb:1NF7;pdb:1NFB;pdb:6I0M;pdb:6I0O;pdb:6U8E;pdb:6U8N;pdb:6U8R;pdb:6U8S;pdb:6U9O;pdb:6UA2;pdb:6UA4;pdb:6UA5;pdb:6UAJ;pdb:6UC2;pdb:6UDO;pdb:6UDP;pdb:6UDQ;reactome:R-HSA-57350;reactome:R-HSA-6798695;reac…	physical interactor	376180	protein interaction	Biogrid	26344197;31980649
37795	SH3KBP1	protein	dip:DIP-31803N;ensembl:ENSG00000147010;ensembl:ENSP00000369020;ensembl:ENSP00000369039;ensembl:ENSP00000380921;ensembl:ENST00000379698;ensembl:ENST00000379716;ensembl:ENST00000397821;entrez-gene:30011;hgnc-id:13867;hgnc-symbol:SH3KBP1;hprd:02301;intact:EBI-346595;pdb:2BZ8;pdb:2K6D;pdb:2K9G;pdb:2N64;pdb:2O2O;pdb:2YDL;pdb:5ABS;reactome:R-HSA-182926;reactome:R-HSA-182955;reactome:R-HSA-182957;reacto…	physical interactor	797315	csk23_human	protein	ensembl:ENSG00000254598;ensembl:ENSP00000473553;ensembl:ENST00000528848;entrez-gene:283106;hgnc-id:2458;intact:EBI-21265922;refseq:NM_001256686;refseq:NP_001243615;uniprot:CSK23_HUMAN;uniprot:Q8NEV1	physical interactor	578845	protein interaction	Biogrid	31980649
37795	SH3KBP1	protein	dip:DIP-31803N;ensembl:ENSG00000147010;ensembl:ENSP00000369020;ensembl:ENSP00000369039;ensembl:ENSP00000380921;ensembl:ENST00000379698;ensembl:ENST00000379716;ensembl:ENST00000397821;entrez-gene:30011;hgnc-id:13867;hgnc-symbol:SH3KBP1;hprd:02301;intact:EBI-346595;pdb:2BZ8;pdb:2K6D;pdb:2K9G;pdb:2N64;pdb:2O2O;pdb:2YDL;pdb:5ABS;reactome:R-HSA-182926;reactome:R-HSA-182955;reactome:R-HSA-182957;reacto…	physical interactor	10330	ALDH1A3	protein	ensembl:ENSG00000184254;ensembl:ENSP00000332256;ensembl:ENST00000329841;entrez-gene:220;hgnc-id:409;hprd:02713;humancyc:HS00013-MONOMER;intact:EBI-21573752;kegg:hsa:220;pdb:5FHZ;pdb:6S6W;reactome:R-HSA-2980896;reactome:R-HSA-5365859;refseq:NM_000693;refseq:NM_001293815;refseq:NP_000684;refseq:NP_001280744;uniprot:A0A024RC95;uniprot:AL1A3_HUMAN;uniprot:P47895;uniprot:Q6NT64	physical interactor	578844	protein interaction	Biogrid	31980649
31481	RPS6KA3	protein	dip:DIP-38247N;ensembl:ENSG00000177189;ensembl:ENSP00000368884;ensembl:ENST00000379565;entrez-gene:6197;hgnc-id:10432;hgnc-symbol:RPS6KA3;hprd:02092;humancyc:HS11136-MONOMER;intact:EBI-1046616;pdb:4D9T;pdb:4D9U;pdb:4JG6;pdb:4JG7;pdb:4JG8;pdb:4NUS;pdb:4NW5;pdb:4NW6;pdb:5D9K;pdb:5D9L;reactome:R-HSA-198753;reactome:R-HSA-199830;reactome:R-HSA-199869;reactome:R-HSA-199920;reactome:R-HSA-2559582;react…	physical interactor	28125	DOCK4	protein	ensembl:ENSG00000128512;ensembl:ENSP00000404179;ensembl:ENSP00000410746;ensembl:ENST00000428084;ensembl:ENST00000437633;entrez-gene:9732;hgnc-id:19192;hprd:07407;intact:EBI-1059186;intact:EBI-21557617;reactome:R-HSA-1012995;reactome:R-HSA-983231;refseq:NM_014705;refseq:NP_055520;refseq:XM_006716188;refseq:XM_006716189;refseq:XM_017012819;refseq:XM_017012820;refseq:XM_017012821;refseq:XM_017012822…	physical interactor	525617	protein interaction	Biogrid	31678930
248428	ZCCHC12	protein	ensembl:ENSG00000174460;ensembl:ENSP00000308921;ensembl:ENST00000310164;entrez-gene:170261;hgnc-id:27273;hprd:06616;intact:EBI-748373;refseq:NM_001312891;refseq:NM_173798;refseq:NP_001299820;refseq:NP_776159;uniprot:B3KV48;uniprot:Q6PEW1;uniprot:Q6PID5;uniprot:Q8N1C1;uniprot:ZCH12_HUMAN	physical interactor	53773	ABHD5	protein	ensembl:ENSG00000011198;ensembl:ENSP00000495778;ensembl:ENSP00000497701;ensembl:ENST00000644371;ensembl:ENST00000649763;entrez-gene:51099;hgnc-id:21396;hprd:05308;hprd:11986;humancyc:HS00306-MONOMER;intact:EBI-2813554;reactome:R-HSA-163485;reactome:R-HSA-163531;reactome:R-HSA-163560;refseq:NM_016006;refseq:NP_057090;refseq:XM_011533780;unigene:19385;uniprot:ABHD5_HUMAN;uniprot:B2R9K0;uniprot:Q8WT…	physical interactor	86254	protein interaction	Biogrid;IntAct	32296183;unassigned1304
677948	ANKRD11	protein	ensembl:ENSG00000167522;ensembl:ENSP00000301030;ensembl:ENSP00000367581;ensembl:ENSP00000495226;ensembl:ENST00000301030;ensembl:ENST00000378330;ensembl:ENST00000642600;entrez-gene:29123;hgnc-id:21316;hgnc-symbol:ANKRD11;hprd:12456;intact:EBI-2808987;refseq:NM_001256182;refseq:NM_001256183;refseq:NM_013275;refseq:NP_001243111;refseq:NP_001243112;refseq:NP_037407;refseq:XM_006721181;refseq:XM_00672…	physical interactor	314534	KPNA6	protein	dip:DIP-27609N;ensembl:ENSG00000025800;ensembl:ENSP00000362728;ensembl:ENST00000373625;entrez-gene:23633;hgnc-id:6399;hgnc-symbol:KPNA6;hprd:09465;intact:EBI-359923;pdb:4UAD;refseq:NM_012316;refseq:NP_036448;refseq:XM_005270711;uniprot:B2RDC7;uniprot:D3DPP5;uniprot:IMA7_HUMAN;uniprot:O60684;uniprot:Q5VVU3	physical interactor	555036	protein interaction	Biogrid	32296183
71122	EIF2S3	protein	ensembl:ENSG00000130741;ensembl:ENSP00000253039;ensembl:ENST00000253039;entrez-gene:1968;hgnc-id:3267;hgnc-symbol:EIF2S3;hprd:02155;intact:EBI-1054228;intact:EBI-11602611;pdb:6FEC;pdb:6K71;pdb:6K72;pdb:6O81;pdb:6O85;pdb:6YBV;pdb:6ZMW;pdb:6ZP4;pdb:7A09;reactome:R-HSA-156827;reactome:R-HSA-381042;reactome:R-HSA-382556;reactome:R-HSA-72514;reactome:R-HSA-72649;reactome:R-HSA-72695;reactome:R-HSA-727…	physical interactor	39869	PLD3	protein	ensembl:ENSG00000105223;ensembl:ENSP00000348901;ensembl:ENSP00000386293;ensembl:ENSP00000386938;ensembl:ENSP00000387022;ensembl:ENSP00000387050;ensembl:ENST00000356508;ensembl:ENST00000409281;ensembl:ENST00000409419;ensembl:ENST00000409587;ensembl:ENST00000409735;entrez-gene:23646;hgnc-id:17158;hprd:07148;humancyc:HS02695-MONOMER;intact:EBI-2689908;kegg:hsa:23646;reactome:R-HSA-1483148;reactome:R…	physical interactor	323549	protein interaction	Biogrid	22863883
677948	ANKRD11	protein	ensembl:ENSG00000167522;ensembl:ENSP00000301030;ensembl:ENSP00000367581;ensembl:ENSP00000495226;ensembl:ENST00000301030;ensembl:ENST00000378330;ensembl:ENST00000642600;entrez-gene:29123;hgnc-id:21316;hgnc-symbol:ANKRD11;hprd:12456;intact:EBI-2808987;refseq:NM_001256182;refseq:NM_001256183;refseq:NM_013275;refseq:NP_001243111;refseq:NP_001243112;refseq:NP_037407;refseq:XM_006721181;refseq:XM_00672…	physical interactor	491504	ufc1_human	protein	ensembl:ENSG00000143222;ensembl:ENSP00000356982;ensembl:ENST00000368003;entrez-gene:51506;hgnc-id:26941;hprd:15643;intact:EBI-1045733;pdb:2K07;pdb:2Z6O;pdb:2Z6P;pdb:3EVX;refseq:NM_016406;refseq:NP_057490;refseq:XM_005245254;refseq:XM_017001450;refseq:XM_017001451;refseq:XP_016856939;refseq:XP_016856940;uniprot:A8K9R1;uniprot:D3DVF9;uniprot:Q549X0;uniprot:Q5VTX1;uniprot:Q9BS96;uniprot:Q9P009;unipr…	physical interactor	558415	protein interaction	Biogrid	32296183
37795	SH3KBP1	protein	dip:DIP-31803N;ensembl:ENSG00000147010;ensembl:ENSP00000369020;ensembl:ENSP00000369039;ensembl:ENSP00000380921;ensembl:ENST00000379698;ensembl:ENST00000379716;ensembl:ENST00000397821;entrez-gene:30011;hgnc-id:13867;hgnc-symbol:SH3KBP1;hprd:02301;intact:EBI-346595;pdb:2BZ8;pdb:2K6D;pdb:2K9G;pdb:2N64;pdb:2O2O;pdb:2YDL;pdb:5ABS;reactome:R-HSA-182926;reactome:R-HSA-182955;reactome:R-HSA-182957;reacto…	physical interactor	314534	KPNA6	protein	dip:DIP-27609N;ensembl:ENSG00000025800;ensembl:ENSP00000362728;ensembl:ENST00000373625;entrez-gene:23633;hgnc-id:6399;hgnc-symbol:KPNA6;hprd:09465;intact:EBI-359923;pdb:4UAD;refseq:NM_012316;refseq:NP_036448;refseq:XM_005270711;uniprot:B2RDC7;uniprot:D3DPP5;uniprot:IMA7_HUMAN;uniprot:O60684;uniprot:Q5VVU3	physical interactor	649982	protein interaction	Spike	16713569
31481	RPS6KA3	protein	dip:DIP-38247N;ensembl:ENSG00000177189;ensembl:ENSP00000368884;ensembl:ENST00000379565;entrez-gene:6197;hgnc-id:10432;hgnc-symbol:RPS6KA3;hprd:02092;humancyc:HS11136-MONOMER;intact:EBI-1046616;pdb:4D9T;pdb:4D9U;pdb:4JG6;pdb:4JG7;pdb:4JG8;pdb:4NUS;pdb:4NW5;pdb:4NW6;pdb:5D9K;pdb:5D9L;reactome:R-HSA-198753;reactome:R-HSA-199830;reactome:R-HSA-199869;reactome:R-HSA-199920;reactome:R-HSA-2559582;react…	physical interactor	70925	HSPH1	protein	ensembl:ENSG00000120694;ensembl:ENSP00000318687;ensembl:ENSP00000369768;ensembl:ENSP00000396090;ensembl:ENSP00000487365;ensembl:ENST00000320027;ensembl:ENST00000380405;ensembl:ENST00000630972;entrez-gene:10808;hgnc-id:16969;hgnc-symbol:HSPH1;hprd:09990;intact:EBI-2859494;intact:EBI-356829;pdb:6GFA;reactome:R-HSA-3000484;reactome:R-HSA-3221883;reactome:R-HSA-3221904;reactome:R-HSA-3299412;reactome…	physical interactor	578479	protein interaction	Biogrid	31980649
36496	RPS6KA4	protein	ensembl:ENSG00000162302;ensembl:ENSP00000333896;ensembl:ENSP00000435580;ensembl:ENST00000334205;entrez-gene:8986;hgnc-id:10433;hgnc-symbol:RPS6KA4;hprd:04677;humancyc:HS08656-MONOMER;intact:EBI-21622593;intact:EBI-73933;reactome:R-HSA-437239;reactome:R-HSA-772527;refseq:NM_001006944;refseq:NM_001300802;refseq:NM_001318361;refseq:NM_003942;refseq:NP_001006945;refseq:NP_001287731;refseq:NP_00130529…	enzyme	90486	RPS6KB2	protein	ensembl:ENSG00000175634;ensembl:ENSP00000308413;ensembl:ENSP00000432847;ensembl:ENST00000312629;ensembl:ENST00000528964;entrez-gene:6199;hgnc-id:10437;hgnc-symbol:RPS6KB2;hprd:10203;humancyc:HS10964-MONOMER;intact:EBI-3905921;intact:EBI-5773494;reactome:R-HSA-198693;reactome:R-HSA-199844;reactome:R-HSA-199877;reactome:R-HSA-5674400;refseq:NM_003952;refseq:NP_001007072;refseq:NP_003943;refseq:XM_0…	enzyme	29236	biochemical reaction	HumanCyc	10662544;8774846
31481	RPS6KA3	protein	dip:DIP-38247N;ensembl:ENSG00000177189;ensembl:ENSP00000368884;ensembl:ENST00000379565;entrez-gene:6197;hgnc-id:10432;hgnc-symbol:RPS6KA3;hprd:02092;humancyc:HS11136-MONOMER;intact:EBI-1046616;pdb:4D9T;pdb:4D9U;pdb:4JG6;pdb:4JG7;pdb:4JG8;pdb:4NUS;pdb:4NW5;pdb:4NW6;pdb:5D9K;pdb:5D9L;reactome:R-HSA-198753;reactome:R-HSA-199830;reactome:R-HSA-199869;reactome:R-HSA-199920;reactome:R-HSA-2559582;react…	activator	8202	KDM4B	protein	dip:DIP-47283N;ensembl:ENSG00000127663;ensembl:ENSP00000159111;ensembl:ENSP00000371178;ensembl:ENSP00000480642;ensembl:ENST00000381759;entrez-gene:23030;hgnc-id:29136;hprd:11056;intact:EBI-725902;pdb:4LXL;pdb:4UC4;reactome:R-HSA-3214396;reactome:R-HSA-3214842;reactome:R-HSA-5683074;reactome:R-HSA-5693565;reactome:R-HSA-9011732;reactome:R-HSA-9018519;refseq:NM_015015;refseq:NP_055830;refseq:XM_005…	activator	644652	biochemical reaction	Spike
12405	USP9X	protein	dip:DIP-27562N;ensembl:ENSG00000124486;ensembl:ENSP00000316357;ensembl:ENSP00000367558;entrez-gene:8239;hgnc-id:12632;hgnc-symbol:USP9X;hprd:02091;humancyc:HS04777-MONOMER;intact:EBI-1058656;intact:EBI-10964523;intact:EBI-302524;reactome:R-HSA-870499;refseq:NM_001039590;refseq:NM_001039591;refseq:NM_004652;refseq:NM_021906;refseq:NP_001034680;refseq:NP_004643;refseq:NP_068706;refseq:XM_005272675;…	physical interactor	491504	ufc1_human	protein	ensembl:ENSG00000143222;ensembl:ENSP00000356982;ensembl:ENST00000368003;entrez-gene:51506;hgnc-id:26941;hprd:15643;intact:EBI-1045733;pdb:2K07;pdb:2Z6O;pdb:2Z6P;pdb:3EVX;refseq:NM_016406;refseq:NP_057490;refseq:XM_005245254;refseq:XM_017001450;refseq:XM_017001451;refseq:XP_016856939;refseq:XP_016856940;uniprot:A8K9R1;uniprot:D3DVF9;uniprot:Q549X0;uniprot:Q5VTX1;uniprot:Q9BS96;uniprot:Q9P009;unipr…	physical interactor	299668	protein interaction	Biogrid	22939629
58641	OFD1	protein	dip:DIP-60601N;ensembl:ENSG00000046651;ensembl:ENSP00000344314;ensembl:ENSP00000369923;ensembl:ENSP00000369941;ensembl:ENST00000340096;ensembl:ENST00000380550;entrez-gene:8481;hgnc-id:2567;hgnc-symbol:OFD1;hprd:02162;intact:EBI-21504069;intact:EBI-716327;reactome:R-HSA-2565942;reactome:R-HSA-380259;reactome:R-HSA-380270;reactome:R-HSA-380284;reactome:R-HSA-380318;reactome:R-HSA-380320;reactome:R-…	physical interactor	529693	q69yn44	protein	ensembl:ENSG00000164944;ensembl:ENSP00000297591;ensembl:ENSP00000398390;ensembl:ENST00000297591;ensembl:ENST00000421249;entrez-gene:25962;hgnc-id:24500;hgnc-symbol:KIAA1429;hprd:10889;intact:EBI-18054817;intact:EBI-21586473;intact:EBI-2819293;refseq:NM_015496;refseq:NM_183009;refseq:NP_056311;refseq:NP_892121;refseq:XM_017013306;refseq:XM_017013307;refseq:XM_017013308;refseq:XP_016868795;uniprot:…	physical interactor	586759	protein interaction	Biogrid	29395067
31481	RPS6KA3	protein	dip:DIP-38247N;ensembl:ENSG00000177189;ensembl:ENSP00000368884;ensembl:ENST00000379565;entrez-gene:6197;hgnc-id:10432;hgnc-symbol:RPS6KA3;hprd:02092;humancyc:HS11136-MONOMER;intact:EBI-1046616;pdb:4D9T;pdb:4D9U;pdb:4JG6;pdb:4JG7;pdb:4JG8;pdb:4NUS;pdb:4NW5;pdb:4NW6;pdb:5D9K;pdb:5D9L;reactome:R-HSA-198753;reactome:R-HSA-199830;reactome:R-HSA-199869;reactome:R-HSA-199920;reactome:R-HSA-2559582;react…	activator	36496	RPS6KA4	protein	ensembl:ENSG00000162302;ensembl:ENSP00000333896;ensembl:ENSP00000435580;ensembl:ENST00000334205;entrez-gene:8986;hgnc-id:10433;hgnc-symbol:RPS6KA4;hprd:04677;humancyc:HS08656-MONOMER;intact:EBI-21622593;intact:EBI-73933;reactome:R-HSA-437239;reactome:R-HSA-772527;refseq:NM_001006944;refseq:NM_001300802;refseq:NM_001318361;refseq:NM_003942;refseq:NP_001006945;refseq:NP_001287731;refseq:NP_00130529…	activator	29236;32743;32814;36826;38073;644652	biochemical reaction	BioCarta;HumanCyc;INOH;InnateDB;Manual upload;NetPath;PID;PhosphoPOINT;PhosphoSitePlus;Spike	10521409;10558990;10575022;10650954;10660591;10662544;10679065;10739259;10751432;10811867;10856237;10915780;10938077;11002419;11006268;11018520;11027313;11085926;11123304;11157486;11160957;11175347;11259436;11335727;11359840;11438671;11459816;11532940;11533489;11544482;11553668;11579131;11585927;11591753;11698596;11742864;11752053;11880483;11884528;11909979;11931769;11956329;11969286;12039695;120…
15469	H3F3A	protein	dip:DIP-40046N;ensembl:ENSG00000132475;ensembl:ENSG00000163041;ensembl:ENSP00000254810;ensembl:ENSP00000355778;ensembl:ENSP00000355780;ensembl:ENSP00000355781;ensembl:ENSP00000465813;ensembl:ENSP00000466020;ensembl:ENSP00000468714;ensembl:ENSP00000499275;ensembl:ENSP00000499385;ensembl:ENSP00000499800;ensembl:ENST00000254810;ensembl:ENST00000366813;ensembl:ENST00000366815;ensembl:ENST00000366816;…	transcription factor	2345081	EIF2S3	rna	entrez-gene:1968;hgnc-id:3267;hprd:02155;refseq:NC_000023;refseq:NM_001415;refseq:NP_001406;uniprot:P41091	transcribed gene	640404	gene regulatory interaction	BIND	15669143
14757	RBBP7	protein	dip:DIP-436N;ensembl:ENSG00000102054;ensembl:ENSP00000369424;ensembl:ENSP00000369427;ensembl:ENST00000380084;ensembl:ENST00000380087;entrez-gene:5931;hgnc-id:9890;hgnc-symbol:RBBP7;hprd:04231;intact:EBI-3505029;intact:EBI-352227;pdb:3CFS;pdb:3CFV;reactome:R-HSA-212227;reactome:R-HSA-212300;reactome:R-HSA-2559580;reactome:R-HSA-3214815;reactome:R-HSA-3214841;reactome:R-HSA-3214847;reactome:R-HSA-3…	physical interactor	125490	KDM5A	protein	dip:DIP-472N;ensembl:ENSP00000382688;entrez-gene:5927;hgnc-id:9886;hgnc-symbol:JARID1A;hprd:08915;intact:EBI-11043810;intact:EBI-1560836;pdb:2JXJ;reactome:R-HSA-3215029;refseq:NM_001042603;refseq:NP_001036068;refseq:NP_005047;uniprot:A8MUS2;uniprot:A8MV76;uniprot:JAD1A_HUMAN;uniprot:KDM5A_HUMAN;uniprot:P29375;uniprot:Q4LE72;uniprot:Q86XZ1	physical interactor	221920	protein interaction	Biogrid;MINT	24981860;26186194;28514442
146191	ZRSR2	protein	dip:DIP-62117N;ensembl:ENSG00000169249;ensembl:ENSP00000303015;ensembl:ENST00000307771;entrez-gene:8233;hgnc-id:23019;hprd:02068;intact:EBI-6657923;reactome:R-HSA-72165;reactome:R-HSA-8865914;refseq:NM_005089;refseq:NP_005080;refseq:XM_005274597;refseq:XM_006724519;refseq:XM_006724520;refseq:XM_011545589;refseq:XM_017029881;uniprot:Q14D69;uniprot:Q15696;uniprot:U2AFM_HUMAN	physical interactor	146196	SNRNP35	protein	ensembl:ENSG00000184209;ensembl:ENSP00000340774;ensembl:ENSP00000403310;ensembl:ENSP00000432595;ensembl:ENST00000350887;ensembl:ENST00000412157;ensembl:ENST00000526639;entrez-gene:11066;hgnc-id:30852;hprd:15595;intact:EBI-6657950;reactome:R-HSA-6787852;reactome:R-HSA-72165;refseq:NM_022717;refseq:NM_180699;refseq:NP_073208;refseq:NP_851030;refseq:XM_005253545;refseq:XM_006719204;refseq:XP_0052536…	physical interactor	362298	protein interaction	Biogrid	26186194;28514442
133908	DDX3X	protein	dip:DIP-27551N;ensembl:ENSG00000215301;ensembl:ENSP00000382840;ensembl:ENSP00000392494;ensembl:ENSP00000478443;ensembl:ENSP00000486516;ensembl:ENSP00000486720;ensembl:ENSP00000487224;ensembl:ENSP00000494040;ensembl:ENST00000457138;ensembl:ENST00000478993;ensembl:ENST00000629496;ensembl:ENST00000629785;ensembl:ENST00000630255;ensembl:ENST00000644876;entrez-gene:1654;hgnc-id:2745;hgnc-symbol:DDX3X;…	physical interactor	529693	q69yn44	protein	ensembl:ENSG00000164944;ensembl:ENSP00000297591;ensembl:ENSP00000398390;ensembl:ENST00000297591;ensembl:ENST00000421249;entrez-gene:25962;hgnc-id:24500;hgnc-symbol:KIAA1429;hprd:10889;intact:EBI-18054817;intact:EBI-21586473;intact:EBI-2819293;refseq:NM_015496;refseq:NM_183009;refseq:NP_056311;refseq:NP_892121;refseq:XM_017013306;refseq:XM_017013307;refseq:XM_017013308;refseq:XP_016868795;uniprot:…	physical interactor	514136	protein interaction	Biogrid	29507755
124142	GEMIN8	protein	ensembl:ENSG00000046647;ensembl:ENSP00000369895;ensembl:ENSP00000381398;ensembl:ENST00000380523;ensembl:ENST00000398355;entrez-gene:54960;hgnc-id:26044;hprd:06533;intact:EBI-2626001;reactome:R-HSA-191859;reactome:R-HSA-8932878;reactome:R-HSA-8932892;refseq:NM_001042479;refseq:NM_001042480;refseq:NM_017856;refseq:NP_001035944;refseq:NP_001035945;refseq:NP_060326;refseq:XM_005274555;refseq:XM_00527…	physical interactor	124144	GEMIN5	protein	ensembl:ENSG00000082516;ensembl:ENSP00000285873;ensembl:ENST00000285873;entrez-gene:25929;hgnc-id:20043;hgnc-symbol:GEMIN5;hprd:06109;intact:EBI-443630;pdb:5GXH;pdb:5GXI;pdb:5H1J;pdb:5H1K;pdb:5H1L;pdb:5H1M;pdb:5H3S;pdb:5H3T;pdb:5H3U;pdb:5TEE;pdb:5TEF;pdb:5THA;pdb:6RNQ;pdb:6RNS;reactome:R-HSA-191765;reactome:R-HSA-191833;reactome:R-HSA-191859;refseq:NM_001252156;refseq:NM_015465;refseq:NP_00123908…	physical interactor	399069	protein interaction	Biogrid	26496610
432902	GPRASP1	protein	ensembl:ENSG00000198932;ensembl:ENSP00000355146;ensembl:ENSP00000393691;ensembl:ENSP00000409420;ensembl:ENSP00000445683;ensembl:ENSP00000498934;ensembl:ENST00000361600;ensembl:ENST00000415986;ensembl:ENST00000444152;ensembl:ENST00000537097;ensembl:ENST00000652542;entrez-gene:9737;hgnc-id:24834;hgnc-symbol:GPRASP1;hprd:02333;intact:EBI-2514717;refseq:NM_001099410;refseq:NM_001099411;refseq:NM_0011…	physical interactor	58641	OFD1	protein	dip:DIP-60601N;ensembl:ENSG00000046651;ensembl:ENSP00000344314;ensembl:ENSP00000369923;ensembl:ENSP00000369941;ensembl:ENST00000340096;ensembl:ENST00000380550;entrez-gene:8481;hgnc-id:2567;hgnc-symbol:OFD1;hprd:02162;intact:EBI-21504069;intact:EBI-716327;reactome:R-HSA-2565942;reactome:R-HSA-380259;reactome:R-HSA-380270;reactome:R-HSA-380284;reactome:R-HSA-380318;reactome:R-HSA-380320;reactome:R-…	physical interactor	241817	protein interaction	Biogrid;HPRD;Spike	16169070
55664	WIPF2	protein	ensembl:ENSG00000171475;ensembl:ENSP00000320924;ensembl:ENSP00000462350;ensembl:ENSP00000462826;ensembl:ENST00000323571;ensembl:ENST00000583130;ensembl:ENST00000585043;entrez-gene:147179;hgnc-id:30923;hprd:18304;intact:EBI-2850112;reactome:R-HSA-2029482;reactome:R-HSA-2197666;reactome:R-HSA-5663213;reactome:R-HSA-9664422;refseq:NM_133264;refseq:NP_573571;refseq:XM_005257083;refseq:XM_005257084;re…	physical interactor	8101	APBB1	protein	dip:DIP-30903N;ensembl:ENSG00000166313;ensembl:ENSP00000299402;ensembl:ENSP00000311912;ensembl:ENSP00000433338;ensembl:ENSP00000476442;ensembl:ENSP00000476646;ensembl:ENSP00000476846;ensembl:ENSP00000476871;ensembl:ENSP00000477069;ensembl:ENSP00000477213;ensembl:ENST00000299402;ensembl:ENST00000311051;ensembl:ENST00000530885;ensembl:ENST00000608394;ensembl:ENST00000608645;ensembl:ENST00000608655;…	physical interactor	319957	protein interaction	Biogrid	16055720
3480990	CLCN4	rna	ensembl:ENSP00000370213;ensembl:ENSP00000405754;entrez-gene:1183;hgnc-id:2022;hprd:02362;refseq:NM_001256944;refseq:NM_001830;refseq:NP_001243873;refseq:NP_001821;uniprot:P51793	transcribed gene	81572	CLCN4	protein	ensembl:ENSG00000073464;ensembl:ENSP00000370213;ensembl:ENSP00000501922;ensembl:ENST00000380833;ensembl:ENST00000674669;entrez-gene:1183;intact:EBI-22754239;reactome:R-HSA-2671932;reactome:R-HSA-2672351;refseq:NM_001830;refseq:NP_001243873;refseq:NP_001821;uniprot:A1L3U1;uniprot:B7Z5Z4;uniprot:CLCN4_HUMAN;uniprot:P51793;uniprot:Q9UBU1	product	636333	gene regulatory interaction	BIND	14988562
12405	USP9X	protein	dip:DIP-27562N;ensembl:ENSG00000124486;ensembl:ENSP00000316357;ensembl:ENSP00000367558;entrez-gene:8239;hgnc-id:12632;hgnc-symbol:USP9X;hprd:02091;humancyc:HS04777-MONOMER;intact:EBI-1058656;intact:EBI-10964523;intact:EBI-302524;reactome:R-HSA-870499;refseq:NM_001039590;refseq:NM_001039591;refseq:NM_004652;refseq:NM_021906;refseq:NP_001034680;refseq:NP_004643;refseq:NP_068706;refseq:XM_005272675;…	physical interactor	90486	RPS6KB2	protein	ensembl:ENSG00000175634;ensembl:ENSP00000308413;ensembl:ENSP00000432847;ensembl:ENST00000312629;ensembl:ENST00000528964;entrez-gene:6199;hgnc-id:10437;hgnc-symbol:RPS6KB2;hprd:10203;humancyc:HS10964-MONOMER;intact:EBI-3905921;intact:EBI-5773494;reactome:R-HSA-198693;reactome:R-HSA-199844;reactome:R-HSA-199877;reactome:R-HSA-5674400;refseq:NM_003952;refseq:NP_001007072;refseq:NP_003943;refseq:XM_0…	physical interactor	365010	protein interaction	Biogrid	25324306
248429	ZCCHC12	gene	entrez-gene:170261;uniprot:Q6PEW1	transcribed gene	248428	ZCCHC12	protein	ensembl:ENSG00000174460;ensembl:ENSP00000308921;ensembl:ENST00000310164;entrez-gene:170261;hgnc-id:27273;hprd:06616;intact:EBI-748373;refseq:NM_001312891;refseq:NM_173798;refseq:NP_001299820;refseq:NP_776159;uniprot:B3KV48;uniprot:Q6PEW1;uniprot:Q6PID5;uniprot:Q8N1C1;uniprot:ZCH12_HUMAN	product	34339	gene regulatory interaction	PID	19816403;20128690
31481	RPS6KA3	protein	dip:DIP-38247N;ensembl:ENSG00000177189;ensembl:ENSP00000368884;ensembl:ENST00000379565;entrez-gene:6197;hgnc-id:10432;hgnc-symbol:RPS6KA3;hprd:02092;humancyc:HS11136-MONOMER;intact:EBI-1046616;pdb:4D9T;pdb:4D9U;pdb:4JG6;pdb:4JG7;pdb:4JG8;pdb:4NUS;pdb:4NW5;pdb:4NW6;pdb:5D9K;pdb:5D9L;reactome:R-HSA-198753;reactome:R-HSA-199830;reactome:R-HSA-199869;reactome:R-HSA-199920;reactome:R-HSA-2559582;react…	activator	125490	KDM5A	protein	dip:DIP-472N;ensembl:ENSP00000382688;entrez-gene:5927;hgnc-id:9886;hgnc-symbol:JARID1A;hprd:08915;intact:EBI-11043810;intact:EBI-1560836;pdb:2JXJ;reactome:R-HSA-3215029;refseq:NM_001042603;refseq:NP_001036068;refseq:NP_005047;uniprot:A8MUS2;uniprot:A8MV76;uniprot:JAD1A_HUMAN;uniprot:KDM5A_HUMAN;uniprot:P29375;uniprot:Q4LE72;uniprot:Q86XZ1	activator	644652	biochemical reaction	Spike
217729	CDKL5	protein	ensembl:ENSG00000008086;ensembl:ENSP00000369325;ensembl:ENSP00000369332;ensembl:ENSP00000485244;ensembl:ENST00000379989;ensembl:ENST00000379996;ensembl:ENST00000623535;entrez-gene:6792;hgnc-id:11411;hprd:02190;humancyc:HS00230-MONOMER;intact:EBI-1752465;pdb:4BGQ;refseq:NM_001037343;refseq:NM_003159;refseq:NP_001032420;refseq:NP_001310218;refseq:NP_003150;refseq:XM_005274584;refseq:XM_005274585;re…	enzyme	221025	NRK	protein	ensembl:ENSG00000123572;ensembl:ENSP00000434830;entrez-gene:203447;hgnc-id:25391;hgnc-symbol:NRK;hprd:14841;humancyc:HS04674-MONOMER;humancyc:HS14663-MONOMER;refseq:NM_198465;refseq:NP_940867;refseq:XM_006724631;refseq:XM_006724632;refseq:XM_006724633;refseq:XM_006724634;uniprot:NRK_HUMAN;uniprot:Q32ND6;uniprot:Q5H9K2;uniprot:Q6ZMP2;uniprot:Q7Z2Y5	enzyme	29236	biochemical reaction	HumanCyc	10662544;8774846
233140	TXLNG	protein	ensembl:ENSG00000086712;ensembl:ENSP00000369465;ensembl:ENSP00000381222;ensembl:ENST00000380122;ensembl:ENST00000398155;entrez-gene:55787;hgnc-id:18578;hprd:06478;intact:EBI-3445062;refseq:NM_001168683;refseq:NM_018360;refseq:NP_001162154;refseq:NP_060830;refseq:XM_005274558;refseq:XM_017029631;refseq:XP_016885120;uniprot:Q2KQ75;uniprot:Q5JNZ7;uniprot:Q9NUQ3;uniprot:Q9P0X1;uniprot:TXLNG_HUMAN	physical interactor	58641	OFD1	protein	dip:DIP-60601N;ensembl:ENSG00000046651;ensembl:ENSP00000344314;ensembl:ENSP00000369923;ensembl:ENSP00000369941;ensembl:ENST00000340096;ensembl:ENST00000380550;entrez-gene:8481;hgnc-id:2567;hgnc-symbol:OFD1;hprd:02162;intact:EBI-21504069;intact:EBI-716327;reactome:R-HSA-2565942;reactome:R-HSA-380259;reactome:R-HSA-380270;reactome:R-HSA-380284;reactome:R-HSA-380318;reactome:R-HSA-380320;reactome:R-…	physical interactor	383893	protein interaction	Biogrid	26638075
31481	RPS6KA3	protein	dip:DIP-38247N;ensembl:ENSG00000177189;ensembl:ENSP00000368884;ensembl:ENST00000379565;entrez-gene:6197;hgnc-id:10432;hgnc-symbol:RPS6KA3;hprd:02092;humancyc:HS11136-MONOMER;intact:EBI-1046616;pdb:4D9T;pdb:4D9U;pdb:4JG6;pdb:4JG7;pdb:4JG8;pdb:4NUS;pdb:4NW5;pdb:4NW6;pdb:5D9K;pdb:5D9L;reactome:R-HSA-198753;reactome:R-HSA-199830;reactome:R-HSA-199869;reactome:R-HSA-199920;reactome:R-HSA-2559582;react…	physical interactor	15469	H3F3A	protein	dip:DIP-40046N;ensembl:ENSG00000132475;ensembl:ENSG00000163041;ensembl:ENSP00000254810;ensembl:ENSP00000355778;ensembl:ENSP00000355780;ensembl:ENSP00000355781;ensembl:ENSP00000465813;ensembl:ENSP00000466020;ensembl:ENSP00000468714;ensembl:ENSP00000499275;ensembl:ENSP00000499385;ensembl:ENSP00000499800;ensembl:ENST00000254810;ensembl:ENST00000366813;ensembl:ENST00000366815;ensembl:ENST00000366816;…	physical interactor	578483	protein interaction	Biogrid	31980649
14757	RBBP7	protein	dip:DIP-436N;ensembl:ENSG00000102054;ensembl:ENSP00000369424;ensembl:ENSP00000369427;ensembl:ENST00000380084;ensembl:ENST00000380087;entrez-gene:5931;hgnc-id:9890;hgnc-symbol:RBBP7;hprd:04231;intact:EBI-3505029;intact:EBI-352227;pdb:3CFS;pdb:3CFV;reactome:R-HSA-212227;reactome:R-HSA-212300;reactome:R-HSA-2559580;reactome:R-HSA-3214815;reactome:R-HSA-3214841;reactome:R-HSA-3214847;reactome:R-HSA-3…	physical interactor	56151	ZNF512B	protein	ensembl:ENSG00000196700;ensembl:ENSP00000358904;ensembl:ENST00000369888;entrez-gene:57473;hgnc-id:29212;hgnc-symbol:GM632;hgnc-symbol:ZNF512B;hprd:13840;intact:EBI-1049952;pdb:2GQJ;reactome:R-HSA-9715175;refseq:NM_020713;refseq:NP_065764;refseq:XM_005260226;refseq:XM_011528929;refseq:XM_011528930;refseq:XM_011528931;refseq:XM_011528932;refseq:XM_011528933;refseq:XP_011527231;refseq:XP_028968;unip…	physical interactor	359819	protein interaction	Biogrid	26186194;28514442
529693	q69yn44	protein	ensembl:ENSG00000164944;ensembl:ENSP00000297591;ensembl:ENSP00000398390;ensembl:ENST00000297591;ensembl:ENST00000421249;entrez-gene:25962;hgnc-id:24500;hgnc-symbol:KIAA1429;hprd:10889;intact:EBI-18054817;intact:EBI-21586473;intact:EBI-2819293;refseq:NM_015496;refseq:NM_183009;refseq:NP_056311;refseq:NP_892121;refseq:XM_017013306;refseq:XM_017013307;refseq:XM_017013308;refseq:XP_016868795;uniprot:…	physical interactor	7872	IMPDH2	protein	ensembl:ENSG00000178035;ensembl:ENSP00000321584;ensembl:ENST00000326739;entrez-gene:3615;hgnc-id:6053;hgnc-symbol:IMPDH2;hprd:00895;humancyc:HS11242-MONOMER;intact:EBI-353389;kegg:hsa:3615;pdb:1B3O;pdb:1NF7;pdb:1NFB;pdb:6I0M;pdb:6I0O;pdb:6U8E;pdb:6U8N;pdb:6U8R;pdb:6U8S;pdb:6U9O;pdb:6UA2;pdb:6UA4;pdb:6UA5;pdb:6UAJ;pdb:6UC2;pdb:6UDO;pdb:6UDP;pdb:6UDQ;reactome:R-HSA-57350;reactome:R-HSA-6798695;reac…	physical interactor	514146	protein interaction	Biogrid	29507755
434671	SEPTIN6	protein	dip:DIP-38218N;ensembl:ENSG00000125354;ensembl:ENSP00000341524;ensembl:ENSP00000346169;ensembl:ENSP00000353278;ensembl:ENSP00000378108;ensembl:ENSP00000418715;ensembl:ENSP00000435818;ensembl:ENST00000343984;ensembl:ENST00000354228;ensembl:ENST00000360156;ensembl:ENST00000394610;ensembl:ENST00000460411;ensembl:ENST00000489216;entrez-gene:23157;hgnc-id:15848;hgnc-symbol:SEPT6;hprd:06716;intact:EBI-…	physical interactor	8101	APBB1	protein	dip:DIP-30903N;ensembl:ENSG00000166313;ensembl:ENSP00000299402;ensembl:ENSP00000311912;ensembl:ENSP00000433338;ensembl:ENSP00000476442;ensembl:ENSP00000476646;ensembl:ENSP00000476846;ensembl:ENSP00000476871;ensembl:ENSP00000477069;ensembl:ENSP00000477213;ensembl:ENST00000299402;ensembl:ENST00000311051;ensembl:ENST00000530885;ensembl:ENST00000608394;ensembl:ENST00000608645;ensembl:ENST00000608655;…	physical interactor	127084	protein interaction	IntAct	32814053
677948	ANKRD11	protein	ensembl:ENSG00000167522;ensembl:ENSP00000301030;ensembl:ENSP00000367581;ensembl:ENSP00000495226;ensembl:ENST00000301030;ensembl:ENST00000378330;ensembl:ENST00000642600;entrez-gene:29123;hgnc-id:21316;hgnc-symbol:ANKRD11;hprd:12456;intact:EBI-2808987;refseq:NM_001256182;refseq:NM_001256183;refseq:NM_013275;refseq:NP_001243111;refseq:NP_001243112;refseq:NP_037407;refseq:XM_006721181;refseq:XM_00672…	physical interactor	146196	SNRNP35	protein	ensembl:ENSG00000184209;ensembl:ENSP00000340774;ensembl:ENSP00000403310;ensembl:ENSP00000432595;ensembl:ENST00000350887;ensembl:ENST00000412157;ensembl:ENST00000526639;entrez-gene:11066;hgnc-id:30852;hprd:15595;intact:EBI-6657950;reactome:R-HSA-6787852;reactome:R-HSA-72165;refseq:NM_022717;refseq:NM_180699;refseq:NP_073208;refseq:NP_851030;refseq:XM_005253545;refseq:XM_006719204;refseq:XP_0052536…	physical interactor	559351	protein interaction	Biogrid	32296183
2346255	SH3KBP1	rna	ensembl:ENSP00000369039;ensembl:ENSP00000380921;entrez-gene:30011;hgnc-id:13867;hprd:02301;refseq:NM_001024666;refseq:NM_001184960;refseq:NM_031892;refseq:XM_005274494;refseq:XM_005274495;refseq:XM_005274496;refseq:XM_011545498;refseq:XM_011545499;refseq:XM_011545500;refseq:XM_011545502;refseq:XM_017029459;refseq:XM_017029460;refseq:XM_017029461;refseq:XM_017029462;refseq:XM_017029463;refseq:XM_0…	physical interactor	529693	q69yn44	protein	ensembl:ENSG00000164944;ensembl:ENSP00000297591;ensembl:ENSP00000398390;ensembl:ENST00000297591;ensembl:ENST00000421249;entrez-gene:25962;hgnc-id:24500;hgnc-symbol:KIAA1429;hprd:10889;intact:EBI-18054817;intact:EBI-21586473;intact:EBI-2819293;refseq:NM_015496;refseq:NM_183009;refseq:NP_056311;refseq:NP_892121;refseq:XM_017013306;refseq:XM_017013307;refseq:XM_017013308;refseq:XP_016868795;uniprot:…	physical interactor	511980	protein interaction	Biogrid	29507755
52413	UBA1	protein	dip:DIP-33686N;ensembl:ENSG00000130985;ensembl:ENSP00000338413;ensembl:ENSP00000366568;ensembl:ENST00000335972;ensembl:ENST00000377351;entrez-gene:7317;hgnc-id:12469;hgnc-symbol:UBA1;hgnc-symbol:UBE1;hprd:02440;humancyc:HS05465-MONOMER;intact:EBI-709688;pdb:4P22;pdb:6DC6;reactome:R-HSA-8852116;reactome:R-HSA-8866652;reactome:R-HSA-947698;reactome:R-HSA-983168;refseq:NM_003334;refseq:NM_153280;ref…	enzyme	51388	TBK1	protein	dip:DIP-27529N;ensembl:ENSG00000183735;ensembl:ENSP00000329967;ensembl:ENSP00000498995;ensembl:ENST00000331710;ensembl:ENST00000650790;entrez-gene:29110;hgnc-id:11584;hgnc-symbol:TBK1;hprd:05322;humancyc:HS00020-MONOMER;intact:EBI-1383470;intact:EBI-356402;intact:EBI-5773956;pdb:4EFO;pdb:4EUT;pdb:4EUU;pdb:4IM0;pdb:4IM2;pdb:4IM3;pdb:4IW0;pdb:4IWO;pdb:4IWP;pdb:4IWQ;pdb:5EOA;pdb:5EOF;pdb:5EP6;pdb:5W…	enzyme	33901;36826	biochemical reaction	BioCarta;InnateDB;Manual upload;NetPath;PID;PhosphoPOINT;PhosphoSitePlus;Spike	10066435;10074115;10085062;10096573;10329681;10398585;10421793;10437795;10469655;10521409;10527519;10644755;10722693;10723127;10754328;10764587;10783893;10807933;10811867;10823818;10882136;10889159;10938077;10990461;11027313;11042193;11057907;11106428;11157486;11158290;11231305;11259436;11266466;11297557;11350057;11359840;11368781;11502888;11527961;11533489;11673497;11706022;11724787;11742864;117…
243047	KLF8	protein	ensembl:ENSG00000102349;ensembl:ENSP00000364063;ensembl:ENSP00000417303;ensembl:ENSP00000492126;ensembl:ENST00000374928;ensembl:ENST00000468660;ensembl:ENST00000640927;entrez-gene:11279;hgnc-id:6351;hprd:02238;intact:EBI-7961911;intact:MINT-7969747;refseq:NM_001159296;refseq:NM_001324102;refseq:NM_001324104;refseq:NM_001324105;refseq:NM_007250;refseq:NP_001152768;refseq:NP_001311028;refseq:NP_001…	physical interactor	487111	milk1_human	protein	ensembl:ENSG00000100139;ensembl:ENSP00000215957;ensembl:ENST00000215957;entrez-gene:85377;hgnc-id:29804;hprd:11363;intact:EBI-1056885;pdb:2KSP;refseq:NM_033386;refseq:NP_203744;refseq:XM_005261791;refseq:XM_005261792;refseq:XM_006724345;refseq:XM_011530471;refseq:XM_011530472;refseq:XM_011530473;refseq:XM_011530474;refseq:XM_011530475;refseq:XM_017029026;uniprot:MILK1_HUMAN;uniprot:Q5TI16;uniprot…	physical interactor	401434	protein interaction	Biogrid	26496610
217729	CDKL5	protein	ensembl:ENSG00000008086;ensembl:ENSP00000369325;ensembl:ENSP00000369332;ensembl:ENSP00000485244;ensembl:ENST00000379989;ensembl:ENST00000379996;ensembl:ENST00000623535;entrez-gene:6792;hgnc-id:11411;hprd:02190;humancyc:HS00230-MONOMER;intact:EBI-1752465;pdb:4BGQ;refseq:NM_001037343;refseq:NM_003159;refseq:NP_001032420;refseq:NP_001310218;refseq:NP_003150;refseq:XM_005274584;refseq:XM_005274585;re…	enzyme	51388	TBK1	protein	dip:DIP-27529N;ensembl:ENSG00000183735;ensembl:ENSP00000329967;ensembl:ENSP00000498995;ensembl:ENST00000331710;ensembl:ENST00000650790;entrez-gene:29110;hgnc-id:11584;hgnc-symbol:TBK1;hprd:05322;humancyc:HS00020-MONOMER;intact:EBI-1383470;intact:EBI-356402;intact:EBI-5773956;pdb:4EFO;pdb:4EUT;pdb:4EUU;pdb:4IM0;pdb:4IM2;pdb:4IM3;pdb:4IW0;pdb:4IWO;pdb:4IWP;pdb:4IWQ;pdb:5EOA;pdb:5EOF;pdb:5EP6;pdb:5W…	enzyme	29236	biochemical reaction	HumanCyc	10662544;8774846
12405	USP9X	protein	dip:DIP-27562N;ensembl:ENSG00000124486;ensembl:ENSP00000316357;ensembl:ENSP00000367558;entrez-gene:8239;hgnc-id:12632;hgnc-symbol:USP9X;hprd:02091;humancyc:HS04777-MONOMER;intact:EBI-1058656;intact:EBI-10964523;intact:EBI-302524;reactome:R-HSA-870499;refseq:NM_001039590;refseq:NM_001039591;refseq:NM_004652;refseq:NM_021906;refseq:NP_001034680;refseq:NP_004643;refseq:NP_068706;refseq:XM_005272675;…	physical interactor	124144	GEMIN5	protein	ensembl:ENSG00000082516;ensembl:ENSP00000285873;ensembl:ENST00000285873;entrez-gene:25929;hgnc-id:20043;hgnc-symbol:GEMIN5;hprd:06109;intact:EBI-443630;pdb:5GXH;pdb:5GXI;pdb:5H1J;pdb:5H1K;pdb:5H1L;pdb:5H1M;pdb:5H3S;pdb:5H3T;pdb:5H3U;pdb:5TEE;pdb:5TEF;pdb:5THA;pdb:6RNQ;pdb:6RNS;reactome:R-HSA-191765;reactome:R-HSA-191833;reactome:R-HSA-191859;refseq:NM_001252156;refseq:NM_015465;refseq:NP_00123908…	physical interactor	407916	protein interaction	Biogrid	23112048
58641	OFD1	protein	dip:DIP-60601N;ensembl:ENSG00000046651;ensembl:ENSP00000344314;ensembl:ENSP00000369923;ensembl:ENSP00000369941;ensembl:ENST00000340096;ensembl:ENST00000380550;entrez-gene:8481;hgnc-id:2567;hgnc-symbol:OFD1;hprd:02162;intact:EBI-21504069;intact:EBI-716327;reactome:R-HSA-2565942;reactome:R-HSA-380259;reactome:R-HSA-380270;reactome:R-HSA-380284;reactome:R-HSA-380318;reactome:R-HSA-380320;reactome:R-…	physical interactor	28606	CTPS1	protein	ensembl:ENSG00000171793;ensembl:ENSP00000361699;ensembl:ENSP00000361704;ensembl:ENSP00000497602;ensembl:ENSP00000497744;ensembl:ENST00000372616;ensembl:ENST00000649124;ensembl:ENST00000650070;entrez-gene:1503;hgnc-id:2519;hgnc-symbol:CTPS1;hprd:00465;humancyc:HS10382-MONOMER;intact:EBI-1042983;kegg:hsa:1503;pdb:2VO1;pdb:5U03;reactome:R-HSA-499943;reactome:R-HSA-73536;refseq:NM_001301237;refseq:NM…	physical interactor	383562	protein interaction	Biogrid	26638075
52413	UBA1	protein	dip:DIP-33686N;ensembl:ENSG00000130985;ensembl:ENSP00000338413;ensembl:ENSP00000366568;ensembl:ENST00000335972;ensembl:ENST00000377351;entrez-gene:7317;hgnc-id:12469;hgnc-symbol:UBA1;hgnc-symbol:UBE1;hprd:02440;humancyc:HS05465-MONOMER;intact:EBI-709688;pdb:4P22;pdb:6DC6;reactome:R-HSA-8852116;reactome:R-HSA-8866652;reactome:R-HSA-947698;reactome:R-HSA-983168;refseq:NM_003334;refseq:NM_153280;ref…	physical interactor	529693	q69yn44	protein	ensembl:ENSG00000164944;ensembl:ENSP00000297591;ensembl:ENSP00000398390;ensembl:ENST00000297591;ensembl:ENST00000421249;entrez-gene:25962;hgnc-id:24500;hgnc-symbol:KIAA1429;hprd:10889;intact:EBI-18054817;intact:EBI-21586473;intact:EBI-2819293;refseq:NM_015496;refseq:NM_183009;refseq:NP_056311;refseq:NP_892121;refseq:XM_017013306;refseq:XM_017013307;refseq:XM_017013308;refseq:XP_016868795;uniprot:…	physical interactor	513726	protein interaction	Biogrid	29507755
2822922	USP9X	rna	ensembl:ENSP00000316357;ensembl:ENSP00000367558;entrez-gene:8239;hgnc-id:12632;hprd:02091;refseq:NM_001039590;refseq:NM_001039591;refseq:XM_005272675;refseq:XM_005272676;refseq:XP_005272733;uniprot:Q93008	physical interactor	529693	q69yn44	protein	ensembl:ENSG00000164944;ensembl:ENSP00000297591;ensembl:ENSP00000398390;ensembl:ENST00000297591;ensembl:ENST00000421249;entrez-gene:25962;hgnc-id:24500;hgnc-symbol:KIAA1429;hprd:10889;intact:EBI-18054817;intact:EBI-21586473;intact:EBI-2819293;refseq:NM_015496;refseq:NM_183009;refseq:NP_056311;refseq:NP_892121;refseq:XM_017013306;refseq:XM_017013307;refseq:XM_017013308;refseq:XP_016868795;uniprot:…	physical interactor	511084	protein interaction	Biogrid	29507755
125511	KDM6A	protein	dip:DIP-46192N;ensembl:ENSG00000147050;ensembl:ENSP00000367203;ensembl:ENSP00000372355;ensembl:ENSP00000437405;ensembl:ENSP00000443078;ensembl:ENSP00000483595;ensembl:ENST00000377967;entrez-gene:7403;hgnc-id:12637;hgnc-symbol:KDM6A;hprd:02131;intact:EBI-4292203;pdb:3AVR;pdb:3AVS;pdb:6FUK;pdb:6FUL;reactome:R-HSA-3214842;reactome:R-HSA-4754224;reactome:R-HSA-5617472;refseq:NM_001291415;refseq:NM_00…	activator	125490	KDM5A	protein	dip:DIP-472N;ensembl:ENSP00000382688;entrez-gene:5927;hgnc-id:9886;hgnc-symbol:JARID1A;hprd:08915;intact:EBI-11043810;intact:EBI-1560836;pdb:2JXJ;reactome:R-HSA-3215029;refseq:NM_001042603;refseq:NP_001036068;refseq:NP_005047;uniprot:A8MUS2;uniprot:A8MV76;uniprot:JAD1A_HUMAN;uniprot:KDM5A_HUMAN;uniprot:P29375;uniprot:Q4LE72;uniprot:Q86XZ1	activator	644652	biochemical reaction	Spike
58641	OFD1	protein	dip:DIP-60601N;ensembl:ENSG00000046651;ensembl:ENSP00000344314;ensembl:ENSP00000369923;ensembl:ENSP00000369941;ensembl:ENST00000340096;ensembl:ENST00000380550;entrez-gene:8481;hgnc-id:2567;hgnc-symbol:OFD1;hprd:02162;intact:EBI-21504069;intact:EBI-716327;reactome:R-HSA-2565942;reactome:R-HSA-380259;reactome:R-HSA-380270;reactome:R-HSA-380284;reactome:R-HSA-380318;reactome:R-HSA-380320;reactome:R-…	physical interactor	492429	sr1ip_human	protein	ensembl:ENSG00000153006;ensembl:ENSP00000427401;ensembl:ENST00000513458;entrez-gene:285672;hgnc-id:26716;hprd:08210;intact:EBI-10268630;refseq:NM_173829;refseq:NP_776190;uniprot:Q32NC8;uniprot:Q8N9Q2;uniprot:SR1IP_HUMAN	physical interactor	383539	protein interaction	Biogrid	26638075
3480990	CLCN4	rna	ensembl:ENSP00000370213;ensembl:ENSP00000405754;entrez-gene:1183;hgnc-id:2022;hprd:02362;refseq:NM_001256944;refseq:NM_001830;refseq:NP_001243873;refseq:NP_001821;uniprot:P51793	physical interactor	529693	q69yn44	protein	ensembl:ENSG00000164944;ensembl:ENSP00000297591;ensembl:ENSP00000398390;ensembl:ENST00000297591;ensembl:ENST00000421249;entrez-gene:25962;hgnc-id:24500;hgnc-symbol:KIAA1429;hprd:10889;intact:EBI-18054817;intact:EBI-21586473;intact:EBI-2819293;refseq:NM_015496;refseq:NM_183009;refseq:NP_056311;refseq:NP_892121;refseq:XM_017013306;refseq:XM_017013307;refseq:XM_017013308;refseq:XP_016868795;uniprot:…	physical interactor	511679	protein interaction	Biogrid	29507755
529693	q69yn44	protein	ensembl:ENSG00000164944;ensembl:ENSP00000297591;ensembl:ENSP00000398390;ensembl:ENST00000297591;ensembl:ENST00000421249;entrez-gene:25962;hgnc-id:24500;hgnc-symbol:KIAA1429;hprd:10889;intact:EBI-18054817;intact:EBI-21586473;intact:EBI-2819293;refseq:NM_015496;refseq:NM_183009;refseq:NP_056311;refseq:NP_892121;refseq:XM_017013306;refseq:XM_017013307;refseq:XM_017013308;refseq:XP_016868795;uniprot:…	physical interactor	28606	CTPS1	protein	ensembl:ENSG00000171793;ensembl:ENSP00000361699;ensembl:ENSP00000361704;ensembl:ENSP00000497602;ensembl:ENSP00000497744;ensembl:ENST00000372616;ensembl:ENST00000649124;ensembl:ENST00000650070;entrez-gene:1503;hgnc-id:2519;hgnc-symbol:CTPS1;hprd:00465;humancyc:HS10382-MONOMER;intact:EBI-1042983;kegg:hsa:1503;pdb:2VO1;pdb:5U03;reactome:R-HSA-499943;reactome:R-HSA-73536;refseq:NM_001301237;refseq:NM…	physical interactor	513691	protein interaction	Biogrid	29507755
677948	ANKRD11	protein	ensembl:ENSG00000167522;ensembl:ENSP00000301030;ensembl:ENSP00000367581;ensembl:ENSP00000495226;ensembl:ENST00000301030;ensembl:ENST00000378330;ensembl:ENST00000642600;entrez-gene:29123;hgnc-id:21316;hgnc-symbol:ANKRD11;hprd:12456;intact:EBI-2808987;refseq:NM_001256182;refseq:NM_001256183;refseq:NM_013275;refseq:NP_001243111;refseq:NP_001243112;refseq:NP_037407;refseq:XM_006721181;refseq:XM_00672…	physical interactor	485304	bhlh9_human	protein	ensembl:ENSG00000198908;ensembl:ENSP00000354675;ensembl:ENSP00000361820;ensembl:ENSP00000391722;ensembl:ENSP00000403226;ensembl:ENSP00000405893;ensembl:ENST00000361229;ensembl:ENST00000372735;ensembl:ENST00000447531;ensembl:ENST00000448867;ensembl:ENST00000457056;entrez-gene:80823;hgnc-id:29353;hprd:10028;intact:EBI-11519926;refseq:NM_001142524;refseq:NM_001142525;refseq:NM_001142526;refseq:NM_00…	physical interactor	559360	protein interaction	Biogrid	32296183
146191	ZRSR2	protein	dip:DIP-62117N;ensembl:ENSG00000169249;ensembl:ENSP00000303015;ensembl:ENST00000307771;entrez-gene:8233;hgnc-id:23019;hprd:02068;intact:EBI-6657923;reactome:R-HSA-72165;reactome:R-HSA-8865914;refseq:NM_005089;refseq:NP_005080;refseq:XM_005274597;refseq:XM_006724519;refseq:XM_006724520;refseq:XM_011545589;refseq:XM_017029881;uniprot:Q14D69;uniprot:Q15696;uniprot:U2AFM_HUMAN	physical interactor	11376	SNRPG	protein	dip:DIP-34627N;ensembl:ENSG00000143977;ensembl:ENSP00000272348;ensembl:ENST00000272348;entrez-gene:6637;hgnc-id:11163;hprd:04646;intact:EBI-1056206;intact:EBI-624585;pdb:3CW1;pdb:3JCR;pdb:3PGW;pdb:4F7U;pdb:4PJO;pdb:4V98;pdb:4WZJ;pdb:5MQF;pdb:5O9Z;pdb:5XJC;pdb:5XJL;pdb:5XJQ;pdb:5XJR;pdb:5XJT;pdb:5XJU;pdb:5YZG;pdb:5Z56;pdb:5Z57;pdb:5Z58;pdb:6AH0;pdb:6AHD;pdb:6FF7;pdb:6ICZ;pdb:6ID0;pdb:6ID1;pdb:6QDV…	physical interactor	417757	protein interaction	Biogrid	28514442
52413	UBA1	protein	dip:DIP-33686N;ensembl:ENSG00000130985;ensembl:ENSP00000338413;ensembl:ENSP00000366568;ensembl:ENST00000335972;ensembl:ENST00000377351;entrez-gene:7317;hgnc-id:12469;hgnc-symbol:UBA1;hgnc-symbol:UBE1;hprd:02440;humancyc:HS05465-MONOMER;intact:EBI-709688;pdb:4P22;pdb:6DC6;reactome:R-HSA-8852116;reactome:R-HSA-8866652;reactome:R-HSA-947698;reactome:R-HSA-983168;refseq:NM_003334;refseq:NM_153280;ref…	physical interactor	434671	SEPTIN6	protein	dip:DIP-38218N;ensembl:ENSG00000125354;ensembl:ENSP00000341524;ensembl:ENSP00000346169;ensembl:ENSP00000353278;ensembl:ENSP00000378108;ensembl:ENSP00000418715;ensembl:ENSP00000435818;ensembl:ENST00000343984;ensembl:ENST00000354228;ensembl:ENST00000360156;ensembl:ENST00000394610;ensembl:ENST00000460411;ensembl:ENST00000489216;entrez-gene:23157;hgnc-id:15848;hgnc-symbol:SEPT6;hprd:06716;intact:EBI-…	physical interactor	377610	protein interaction	Biogrid	26344197
12405	USP9X	protein	dip:DIP-27562N;ensembl:ENSG00000124486;ensembl:ENSP00000316357;ensembl:ENSP00000367558;entrez-gene:8239;hgnc-id:12632;hgnc-symbol:USP9X;hprd:02091;humancyc:HS04777-MONOMER;intact:EBI-1058656;intact:EBI-10964523;intact:EBI-302524;reactome:R-HSA-870499;refseq:NM_001039590;refseq:NM_001039591;refseq:NM_004652;refseq:NM_021906;refseq:NP_001034680;refseq:NP_004643;refseq:NP_068706;refseq:XM_005272675;…	physical interactor	124142	GEMIN8	protein	ensembl:ENSG00000046647;ensembl:ENSP00000369895;ensembl:ENSP00000381398;ensembl:ENST00000380523;ensembl:ENST00000398355;entrez-gene:54960;hgnc-id:26044;hprd:06533;intact:EBI-2626001;reactome:R-HSA-191859;reactome:R-HSA-8932878;reactome:R-HSA-8932892;refseq:NM_001042479;refseq:NM_001042480;refseq:NM_017856;refseq:NP_001035944;refseq:NP_001035945;refseq:NP_060326;refseq:XM_005274555;refseq:XM_00527…	physical interactor	407917	protein interaction	Biogrid	23112048
3032045	KDM6A	gene	ensembl:ENSP00000367203;ensembl:ENSP00000372355;ensembl:ENSP00000437405;ensembl:ENSP00000443078;ensembl:ENSP00000483595;entrez-gene:7403;hgnc-id:12637;hprd:02131;refseq:NM_001291415;refseq:NM_001291416;refseq:NM_001291417;refseq:NM_001291418;refseq:NM_001291421;refseq:NM_021140;refseq:XM_005272656;refseq:XM_005272658;refseq:XM_005272659;refseq:XM_011543957;refseq:XM_011543958;refseq:XM_011543959;…	physical interactor	529693	q69yn44	protein	ensembl:ENSG00000164944;ensembl:ENSP00000297591;ensembl:ENSP00000398390;ensembl:ENST00000297591;ensembl:ENST00000421249;entrez-gene:25962;hgnc-id:24500;hgnc-symbol:KIAA1429;hprd:10889;intact:EBI-18054817;intact:EBI-21586473;intact:EBI-2819293;refseq:NM_015496;refseq:NM_183009;refseq:NP_056311;refseq:NP_892121;refseq:XM_017013306;refseq:XM_017013307;refseq:XM_017013308;refseq:XP_016868795;uniprot:…	physical interactor	512299	protein interaction	Biogrid	29507755
46934	MTMR1	protein	ensembl:ENSG00000063601;ensembl:ENSP00000359417;ensembl:ENSP00000414178;ensembl:ENSP00000434105;ensembl:ENST00000370390;ensembl:ENST00000485376;entrez-gene:8776;hgnc-id:7449;hprd:02163;intact:EBI-11320553;intact:EBI-21556035;kegg:hsa:8776;pdb:5C16;reactome:R-HSA-1604647;reactome:R-HSA-1660499;refseq:NC_000023;refseq:NM_001306144;refseq:NM_001306145;refseq:NM_003828;refseq:NP_003819;refseq:XM_0052…	physical interactor	47080	SBF2	protein	ensembl:ENSG00000133812;ensembl:ENSP00000256190;ensembl:ENST00000256190;entrez-gene:81846;hgnc-id:2135;hprd:09649;intact:EBI-2683289;reactome:R-HSA-1660499;reactome:R-HSA-6809792;reactome:R-HSA-8876198;refseq:NM_030962;refseq:NP_112224;refseq:XM_005253154;refseq:XM_005253155;refseq:XP_005253211;uniprot:MTMRD_HUMAN;uniprot:Q3MJF0;uniprot:Q68DQ3;uniprot:Q6P459;uniprot:Q6PJD1;uniprot:Q7Z325;uniprot:…	physical interactor	414280	protein interaction	Biogrid	25659891;27880917
133908	DDX3X	protein	dip:DIP-27551N;ensembl:ENSG00000215301;ensembl:ENSP00000382840;ensembl:ENSP00000392494;ensembl:ENSP00000478443;ensembl:ENSP00000486516;ensembl:ENSP00000486720;ensembl:ENSP00000487224;ensembl:ENSP00000494040;ensembl:ENST00000457138;ensembl:ENST00000478993;ensembl:ENST00000629496;ensembl:ENST00000629785;ensembl:ENST00000630255;ensembl:ENST00000644876;entrez-gene:1654;hgnc-id:2745;hgnc-symbol:DDX3X;…	physical interactor	124144	GEMIN5	protein	ensembl:ENSG00000082516;ensembl:ENSP00000285873;ensembl:ENST00000285873;entrez-gene:25929;hgnc-id:20043;hgnc-symbol:GEMIN5;hprd:06109;intact:EBI-443630;pdb:5GXH;pdb:5GXI;pdb:5H1J;pdb:5H1K;pdb:5H1L;pdb:5H1M;pdb:5H3S;pdb:5H3T;pdb:5H3U;pdb:5TEE;pdb:5TEF;pdb:5THA;pdb:6RNQ;pdb:6RNS;reactome:R-HSA-191765;reactome:R-HSA-191833;reactome:R-HSA-191859;refseq:NM_001252156;refseq:NM_015465;refseq:NP_00123908…	physical interactor	390992	protein interaction	Biogrid	26496610
125511	KDM6A	protein	dip:DIP-46192N;ensembl:ENSG00000147050;ensembl:ENSP00000367203;ensembl:ENSP00000372355;ensembl:ENSP00000437405;ensembl:ENSP00000443078;ensembl:ENSP00000483595;ensembl:ENST00000377967;entrez-gene:7403;hgnc-id:12637;hgnc-symbol:KDM6A;hprd:02131;intact:EBI-4292203;pdb:3AVR;pdb:3AVS;pdb:6FUK;pdb:6FUL;reactome:R-HSA-3214842;reactome:R-HSA-4754224;reactome:R-HSA-5617472;refseq:NM_001291415;refseq:NM_00…	activator	36496	RPS6KA4	protein	ensembl:ENSG00000162302;ensembl:ENSP00000333896;ensembl:ENSP00000435580;ensembl:ENST00000334205;entrez-gene:8986;hgnc-id:10433;hgnc-symbol:RPS6KA4;hprd:04677;humancyc:HS08656-MONOMER;intact:EBI-21622593;intact:EBI-73933;reactome:R-HSA-437239;reactome:R-HSA-772527;refseq:NM_001006944;refseq:NM_001300802;refseq:NM_001318361;refseq:NM_003942;refseq:NP_001006945;refseq:NP_001287731;refseq:NP_00130529…	activator	644652	biochemical reaction	Spike
8202	KDM4B	protein	dip:DIP-47283N;ensembl:ENSG00000127663;ensembl:ENSP00000159111;ensembl:ENSP00000371178;ensembl:ENSP00000480642;ensembl:ENST00000381759;entrez-gene:23030;hgnc-id:29136;hprd:11056;intact:EBI-725902;pdb:4LXL;pdb:4UC4;reactome:R-HSA-3214396;reactome:R-HSA-3214842;reactome:R-HSA-5683074;reactome:R-HSA-5693565;reactome:R-HSA-9011732;reactome:R-HSA-9018519;refseq:NM_015015;refseq:NP_055830;refseq:XM_005…	activator	36496	RPS6KA4	protein	ensembl:ENSG00000162302;ensembl:ENSP00000333896;ensembl:ENSP00000435580;ensembl:ENST00000334205;entrez-gene:8986;hgnc-id:10433;hgnc-symbol:RPS6KA4;hprd:04677;humancyc:HS08656-MONOMER;intact:EBI-21622593;intact:EBI-73933;reactome:R-HSA-437239;reactome:R-HSA-772527;refseq:NM_001006944;refseq:NM_001300802;refseq:NM_001318361;refseq:NM_003942;refseq:NP_001006945;refseq:NP_001287731;refseq:NP_00130529…	activator	644652	biochemical reaction	Spike
14757	RBBP7	protein	dip:DIP-436N;ensembl:ENSG00000102054;ensembl:ENSP00000369424;ensembl:ENSP00000369427;ensembl:ENST00000380084;ensembl:ENST00000380087;entrez-gene:5931;hgnc-id:9890;hgnc-symbol:RBBP7;hprd:04231;intact:EBI-3505029;intact:EBI-352227;pdb:3CFS;pdb:3CFV;reactome:R-HSA-212227;reactome:R-HSA-212300;reactome:R-HSA-2559580;reactome:R-HSA-3214815;reactome:R-HSA-3214841;reactome:R-HSA-3214847;reactome:R-HSA-3…	physical interactor	15469	H3F3A	protein	dip:DIP-40046N;ensembl:ENSG00000132475;ensembl:ENSG00000163041;ensembl:ENSP00000254810;ensembl:ENSP00000355778;ensembl:ENSP00000355780;ensembl:ENSP00000355781;ensembl:ENSP00000465813;ensembl:ENSP00000466020;ensembl:ENSP00000468714;ensembl:ENSP00000499275;ensembl:ENSP00000499385;ensembl:ENSP00000499800;ensembl:ENST00000254810;ensembl:ENST00000366813;ensembl:ENST00000366815;ensembl:ENST00000366816;…	physical interactor	467756	protein interaction	Biogrid	27705803
133908	DDX3X	protein	dip:DIP-27551N;ensembl:ENSG00000215301;ensembl:ENSP00000382840;ensembl:ENSP00000392494;ensembl:ENSP00000478443;ensembl:ENSP00000486516;ensembl:ENSP00000486720;ensembl:ENSP00000487224;ensembl:ENSP00000494040;ensembl:ENST00000457138;ensembl:ENST00000478993;ensembl:ENST00000629496;ensembl:ENST00000629785;ensembl:ENST00000630255;ensembl:ENST00000644876;entrez-gene:1654;hgnc-id:2745;hgnc-symbol:DDX3X;…	physical interactor	56151	ZNF512B	protein	ensembl:ENSG00000196700;ensembl:ENSP00000358904;ensembl:ENST00000369888;entrez-gene:57473;hgnc-id:29212;hgnc-symbol:GM632;hgnc-symbol:ZNF512B;hprd:13840;intact:EBI-1049952;pdb:2GQJ;reactome:R-HSA-9715175;refseq:NM_020713;refseq:NP_065764;refseq:XM_005260226;refseq:XM_011528929;refseq:XM_011528930;refseq:XM_011528931;refseq:XM_011528932;refseq:XM_011528933;refseq:XP_011527231;refseq:XP_028968;unip…	physical interactor	205308	protein interaction	BIND;Biogrid;IntAct;MINT;Spike	15231748
2345081	EIF2S3	rna	entrez-gene:1968;hgnc-id:3267;hprd:02155;refseq:NC_000023;refseq:NM_001415;refseq:NP_001406;uniprot:P41091	transcribed gene	71122	EIF2S3	protein	ensembl:ENSG00000130741;ensembl:ENSP00000253039;ensembl:ENST00000253039;entrez-gene:1968;hgnc-id:3267;hgnc-symbol:EIF2S3;hprd:02155;intact:EBI-1054228;intact:EBI-11602611;pdb:6FEC;pdb:6K71;pdb:6K72;pdb:6O81;pdb:6O85;pdb:6YBV;pdb:6ZMW;pdb:6ZP4;pdb:7A09;reactome:R-HSA-156827;reactome:R-HSA-381042;reactome:R-HSA-382556;reactome:R-HSA-72514;reactome:R-HSA-72649;reactome:R-HSA-72695;reactome:R-HSA-727…	product	633015;640124;640127;640128;640403;640404	gene regulatory interaction	BIND	12808131;14988562;15669143
125511	KDM6A	protein	dip:DIP-46192N;ensembl:ENSG00000147050;ensembl:ENSP00000367203;ensembl:ENSP00000372355;ensembl:ENSP00000437405;ensembl:ENSP00000443078;ensembl:ENSP00000483595;ensembl:ENST00000377967;entrez-gene:7403;hgnc-id:12637;hgnc-symbol:KDM6A;hprd:02131;intact:EBI-4292203;pdb:3AVR;pdb:3AVS;pdb:6FUK;pdb:6FUL;reactome:R-HSA-3214842;reactome:R-HSA-4754224;reactome:R-HSA-5617472;refseq:NM_001291415;refseq:NM_00…	activator	8202	KDM4B	protein	dip:DIP-47283N;ensembl:ENSG00000127663;ensembl:ENSP00000159111;ensembl:ENSP00000371178;ensembl:ENSP00000480642;ensembl:ENST00000381759;entrez-gene:23030;hgnc-id:29136;hprd:11056;intact:EBI-725902;pdb:4LXL;pdb:4UC4;reactome:R-HSA-3214396;reactome:R-HSA-3214842;reactome:R-HSA-5683074;reactome:R-HSA-5693565;reactome:R-HSA-9011732;reactome:R-HSA-9018519;refseq:NM_015015;refseq:NP_055830;refseq:XM_005…	activator	644652	biochemical reaction	Spike
11023	PRPS2	protein	ensembl:ENSG00000101911;ensembl:ENSP00000370043;ensembl:ENSP00000381504;ensembl:ENST00000380668;ensembl:ENST00000398491;entrez-gene:5634;hgnc-id:9465;hprd:02414;humancyc:HS02317-MONOMER;intact:EBI-12063547;intact:EBI-4290895;kegg:hsa:5634;reactome:R-HSA-58224;reactome:R-HSA-73843;refseq:NM_001039091;refseq:NM_002765;refseq:NP_001034180;refseq:NP_002756;unigene:2910;uniprot:P11908;uniprot:PRPS2_HU…	physical interactor	7739	PPAT	protein	ensembl:ENSG00000128059;ensembl:ENSP00000264220;ensembl:ENST00000264220;entrez-gene:5471;hgnc-id:9238;hprd:01402;humancyc:HS05157-MONOMER;intact:EBI-3920254;kegg:hsa:5471;reactome:R-HSA-62496;reactome:R-HSA-73817;refseq:NM_002703;refseq:NP_002694;refseq:XM_011534387;unigene:311;uniprot:A8K4H7;uniprot:PUR1_HUMAN;uniprot:Q06203;uniprot:Q59G63	physical interactor	373970	protein interaction	Biogrid	26344197
28606	CTPS1	protein	ensembl:ENSG00000171793;ensembl:ENSP00000361699;ensembl:ENSP00000361704;ensembl:ENSP00000497602;ensembl:ENSP00000497744;ensembl:ENST00000372616;ensembl:ENST00000649124;ensembl:ENST00000650070;entrez-gene:1503;hgnc-id:2519;hgnc-symbol:CTPS1;hprd:00465;humancyc:HS10382-MONOMER;intact:EBI-1042983;kegg:hsa:1503;pdb:2VO1;pdb:5U03;reactome:R-HSA-499943;reactome:R-HSA-73536;refseq:NM_001301237;refseq:NM…	physical interactor	7872	IMPDH2	protein	ensembl:ENSG00000178035;ensembl:ENSP00000321584;ensembl:ENST00000326739;entrez-gene:3615;hgnc-id:6053;hgnc-symbol:IMPDH2;hprd:00895;humancyc:HS11242-MONOMER;intact:EBI-353389;kegg:hsa:3615;pdb:1B3O;pdb:1NF7;pdb:1NFB;pdb:6I0M;pdb:6I0O;pdb:6U8E;pdb:6U8N;pdb:6U8R;pdb:6U8S;pdb:6U9O;pdb:6UA2;pdb:6UA4;pdb:6UA5;pdb:6UAJ;pdb:6UC2;pdb:6UDO;pdb:6UDP;pdb:6UDQ;reactome:R-HSA-57350;reactome:R-HSA-6798695;reac…	physical interactor	371032	protein interaction	Biogrid	26344197
15469	H3F3A	protein	dip:DIP-40046N;ensembl:ENSG00000132475;ensembl:ENSG00000163041;ensembl:ENSP00000254810;ensembl:ENSP00000355778;ensembl:ENSP00000355780;ensembl:ENSP00000355781;ensembl:ENSP00000465813;ensembl:ENSP00000466020;ensembl:ENSP00000468714;ensembl:ENSP00000499275;ensembl:ENSP00000499385;ensembl:ENSP00000499800;ensembl:ENST00000254810;ensembl:ENST00000366813;ensembl:ENST00000366815;ensembl:ENST00000366816;…	transcription factor	71122	EIF2S3	protein	ensembl:ENSG00000130741;ensembl:ENSP00000253039;ensembl:ENST00000253039;entrez-gene:1968;hgnc-id:3267;hgnc-symbol:EIF2S3;hprd:02155;intact:EBI-1054228;intact:EBI-11602611;pdb:6FEC;pdb:6K71;pdb:6K72;pdb:6O81;pdb:6O85;pdb:6YBV;pdb:6ZMW;pdb:6ZP4;pdb:7A09;reactome:R-HSA-156827;reactome:R-HSA-381042;reactome:R-HSA-382556;reactome:R-HSA-72514;reactome:R-HSA-72649;reactome:R-HSA-72695;reactome:R-HSA-727…	product	640404	gene regulatory interaction	BIND	15669143
116197	RNF128	protein	ensembl:ENSG00000133135;ensembl:ENSP00000255499;ensembl:ENSP00000316127;ensembl:ENST00000255499;ensembl:ENST00000324342;entrez-gene:79589;hgnc-id:21153;hprd:02340;intact:EBI-2341619;pdb:3ICU;reactome:R-HSA-5689880;reactome:R-HSA-5689896;reactome:R-HSA-5690147;reactome:R-HSA-6782813;refseq:NM_024539;refseq:NM_194463;refseq:NP_078815;refseq:NP_919445;uniprot:A0PJI4;uniprot:Q6PH80;uniprot:Q6ZTJ8;uni…	physical interactor	51388	TBK1	protein	dip:DIP-27529N;ensembl:ENSG00000183735;ensembl:ENSP00000329967;ensembl:ENSP00000498995;ensembl:ENST00000331710;ensembl:ENST00000650790;entrez-gene:29110;hgnc-id:11584;hgnc-symbol:TBK1;hprd:05322;humancyc:HS00020-MONOMER;intact:EBI-1383470;intact:EBI-356402;intact:EBI-5773956;pdb:4EFO;pdb:4EUT;pdb:4EUU;pdb:4IM0;pdb:4IM2;pdb:4IM3;pdb:4IW0;pdb:4IWO;pdb:4IWP;pdb:4IWQ;pdb:5EOA;pdb:5EOF;pdb:5EP6;pdb:5W…	physical interactor	412483	protein interaction	Biogrid	27776110
450595	SLC4A1AP	protein	ensembl:ENSG00000163798;ensembl:ENSP00000323837;ensembl:ENSP00000479964;ensembl:ENST00000326019;ensembl:ENST00000613058;entrez-gene:22950;hgnc-id:13813;hgnc-symbol:SLC4A1AP;hprd:04038;intact:EBI-1999704;pdb:4H87;refseq:NC_000002;refseq:NM_018158;refseq:NP_060628;uniprot:A6NJ39;uniprot:NADAP_HUMAN;uniprot:Q4KMT1;uniprot:Q4KMX0;uniprot:Q7Z5Q9;uniprot:Q9BWU0;uniprot:Q9NVN2	physical interactor	11376	SNRPG	protein	dip:DIP-34627N;ensembl:ENSG00000143977;ensembl:ENSP00000272348;ensembl:ENST00000272348;entrez-gene:6637;hgnc-id:11163;hprd:04646;intact:EBI-1056206;intact:EBI-624585;pdb:3CW1;pdb:3JCR;pdb:3PGW;pdb:4F7U;pdb:4PJO;pdb:4V98;pdb:4WZJ;pdb:5MQF;pdb:5O9Z;pdb:5XJC;pdb:5XJL;pdb:5XJQ;pdb:5XJR;pdb:5XJT;pdb:5XJU;pdb:5YZG;pdb:5Z56;pdb:5Z57;pdb:5Z58;pdb:6AH0;pdb:6AHD;pdb:6FF7;pdb:6ICZ;pdb:6ID0;pdb:6ID1;pdb:6QDV…	physical interactor	418748	protein interaction	Biogrid	28514442
217729	CDKL5	protein	ensembl:ENSG00000008086;ensembl:ENSP00000369325;ensembl:ENSP00000369332;ensembl:ENSP00000485244;ensembl:ENST00000379989;ensembl:ENST00000379996;ensembl:ENST00000623535;entrez-gene:6792;hgnc-id:11411;hprd:02190;humancyc:HS00230-MONOMER;intact:EBI-1752465;pdb:4BGQ;refseq:NM_001037343;refseq:NM_003159;refseq:NP_001032420;refseq:NP_001310218;refseq:NP_003150;refseq:XM_005274584;refseq:XM_005274585;re…	enzyme	90486	RPS6KB2	protein	ensembl:ENSG00000175634;ensembl:ENSP00000308413;ensembl:ENSP00000432847;ensembl:ENST00000312629;ensembl:ENST00000528964;entrez-gene:6199;hgnc-id:10437;hgnc-symbol:RPS6KB2;hprd:10203;humancyc:HS10964-MONOMER;intact:EBI-3905921;intact:EBI-5773494;reactome:R-HSA-198693;reactome:R-HSA-199844;reactome:R-HSA-199877;reactome:R-HSA-5674400;refseq:NM_003952;refseq:NP_001007072;refseq:NP_003943;refseq:XM_0…	enzyme	29236	biochemical reaction	HumanCyc	10662544;8774846
7564	PPEF1	protein	ensembl:ENSG00000086717;ensembl:ENSP00000341892;ensembl:ENSP00000354871;ensembl:ENST00000349874;ensembl:ENST00000361511;entrez-gene:5475;hgnc-id:9243;hprd:02118;humancyc:HS01541-MONOMER;intact:EBI-2931238;reactome:R-HSA-2514859;reactome:R-HSA-2632517;refseq:NM_006240;refseq:NM_152223;refseq:NM_152224;refseq:NM_152225;refseq:NM_152226;refseq:NP_006231;refseq:NP_689409;refseq:NP_689410;refseq:NP_68…	physical interactor	70925	HSPH1	protein	ensembl:ENSG00000120694;ensembl:ENSP00000318687;ensembl:ENSP00000369768;ensembl:ENSP00000396090;ensembl:ENSP00000487365;ensembl:ENST00000320027;ensembl:ENST00000380405;ensembl:ENST00000630972;entrez-gene:10808;hgnc-id:16969;hgnc-symbol:HSPH1;hprd:09990;intact:EBI-2859494;intact:EBI-356829;pdb:6GFA;reactome:R-HSA-3000484;reactome:R-HSA-3221883;reactome:R-HSA-3221904;reactome:R-HSA-3299412;reactome…	physical interactor	471003	protein interaction	Biogrid	28330616
12405	USP9X	protein	dip:DIP-27562N;ensembl:ENSG00000124486;ensembl:ENSP00000316357;ensembl:ENSP00000367558;entrez-gene:8239;hgnc-id:12632;hgnc-symbol:USP9X;hprd:02091;humancyc:HS04777-MONOMER;intact:EBI-1058656;intact:EBI-10964523;intact:EBI-302524;reactome:R-HSA-870499;refseq:NM_001039590;refseq:NM_001039591;refseq:NM_004652;refseq:NM_021906;refseq:NP_001034680;refseq:NP_004643;refseq:NP_068706;refseq:XM_005272675;…	physical interactor	507245	rmc1_human	protein	ensembl:ENSG00000141452;ensembl:ENSP00000269221;ensembl:ENSP00000482573;ensembl:ENST00000269221;entrez-gene:29919;hgnc-id:24326;hprd:12693;intact:EBI-2804848;refseq:NM_001276342;refseq:NM_001318707;refseq:NM_001318708;refseq:NM_001318709;refseq:NM_013326;refseq:NP_001305636;refseq:NP_001305637;refseq:NP_001305638;refseq:NP_037458;refseq:XM_006722445;refseq:XM_011525939;refseq:XM_017025717;refseq:…	physical interactor	626946	protein interaction	Biogrid	33144569
52413	UBA1	protein	dip:DIP-33686N;ensembl:ENSG00000130985;ensembl:ENSP00000338413;ensembl:ENSP00000366568;ensembl:ENST00000335972;ensembl:ENST00000377351;entrez-gene:7317;hgnc-id:12469;hgnc-symbol:UBA1;hgnc-symbol:UBE1;hprd:02440;humancyc:HS05465-MONOMER;intact:EBI-709688;pdb:4P22;pdb:6DC6;reactome:R-HSA-8852116;reactome:R-HSA-8866652;reactome:R-HSA-947698;reactome:R-HSA-983168;refseq:NM_003334;refseq:NM_153280;ref…	enzyme	36496	RPS6KA4	protein	ensembl:ENSG00000162302;ensembl:ENSP00000333896;ensembl:ENSP00000435580;ensembl:ENST00000334205;entrez-gene:8986;hgnc-id:10433;hgnc-symbol:RPS6KA4;hprd:04677;humancyc:HS08656-MONOMER;intact:EBI-21622593;intact:EBI-73933;reactome:R-HSA-437239;reactome:R-HSA-772527;refseq:NM_001006944;refseq:NM_001300802;refseq:NM_001318361;refseq:NM_003942;refseq:NP_001006945;refseq:NP_001287731;refseq:NP_00130529…	enzyme	36826	biochemical reaction	InnateDB;NetPath;PID;PhosphoPOINT;PhosphoSitePlus;Spike	10521409;10811867;10938077;11027313;11157486;11259436;11359840;11533489;11742864;11884528;11931769;12230568;12242023;12368228;12419817;12444159;12628924;12672017;12716675;12742080;12759443;12767944;12840022;12842894;12881425;14560022;14600157;14690596;14963024;14996729;15016307;15086905;15100319;15128824;15147869;15171702;15192014;15210811;15252041;15280197;15334063;15465828;15483224;15485852;154…
58641	OFD1	protein	dip:DIP-60601N;ensembl:ENSG00000046651;ensembl:ENSP00000344314;ensembl:ENSP00000369923;ensembl:ENSP00000369941;ensembl:ENST00000340096;ensembl:ENST00000380550;entrez-gene:8481;hgnc-id:2567;hgnc-symbol:OFD1;hprd:02162;intact:EBI-21504069;intact:EBI-716327;reactome:R-HSA-2565942;reactome:R-HSA-380259;reactome:R-HSA-380270;reactome:R-HSA-380284;reactome:R-HSA-380318;reactome:R-HSA-380320;reactome:R-…	physical interactor	51388	TBK1	protein	dip:DIP-27529N;ensembl:ENSG00000183735;ensembl:ENSP00000329967;ensembl:ENSP00000498995;ensembl:ENST00000331710;ensembl:ENST00000650790;entrez-gene:29110;hgnc-id:11584;hgnc-symbol:TBK1;hprd:05322;humancyc:HS00020-MONOMER;intact:EBI-1383470;intact:EBI-356402;intact:EBI-5773956;pdb:4EFO;pdb:4EUT;pdb:4EUU;pdb:4IM0;pdb:4IM2;pdb:4IM3;pdb:4IW0;pdb:4IWO;pdb:4IWP;pdb:4IWQ;pdb:5EOA;pdb:5EOF;pdb:5EP6;pdb:5W…	physical interactor	383889	protein interaction	Biogrid	26638075
31481	RPS6KA3	protein	dip:DIP-38247N;ensembl:ENSG00000177189;ensembl:ENSP00000368884;ensembl:ENST00000379565;entrez-gene:6197;hgnc-id:10432;hgnc-symbol:RPS6KA3;hprd:02092;humancyc:HS11136-MONOMER;intact:EBI-1046616;pdb:4D9T;pdb:4D9U;pdb:4JG6;pdb:4JG7;pdb:4JG8;pdb:4NUS;pdb:4NW5;pdb:4NW6;pdb:5D9K;pdb:5D9L;reactome:R-HSA-198753;reactome:R-HSA-199830;reactome:R-HSA-199869;reactome:R-HSA-199920;reactome:R-HSA-2559582;react…	physical interactor	797315	csk23_human	protein	ensembl:ENSG00000254598;ensembl:ENSP00000473553;ensembl:ENST00000528848;entrez-gene:283106;hgnc-id:2458;intact:EBI-21265922;refseq:NM_001256686;refseq:NP_001243615;uniprot:CSK23_HUMAN;uniprot:Q8NEV1	physical interactor	578506	protein interaction	Biogrid	31980649
46019	HPRT1	protein	ensembl:ENSG00000165704;ensembl:ENSP00000298556;ensembl:ENST00000298556;entrez-gene:3251;hgnc-id:5157;hprd:02388;humancyc:HS09275-MONOMER;intact:EBI-748210;kegg:hsa:3251;pdb:1BZY;pdb:1D6N;pdb:1HMP;pdb:1Z7G;pdb:2VFA;pdb:3GEP;pdb:3GGC;pdb:3GGJ;pdb:4IJQ;pdb:4KN6;pdb:4RAB;pdb:4RAC;pdb:4RAD;pdb:4RAN;pdb:4RAO;pdb:4RAQ;pdb:5BRN;pdb:5BSK;pdb:5HIA;pdb:5W8V;pdb:6BNJ;reactome:R-HSA-56639;reactome:R-HSA-7421…	physical interactor	7739	PPAT	protein	ensembl:ENSG00000128059;ensembl:ENSP00000264220;ensembl:ENST00000264220;entrez-gene:5471;hgnc-id:9238;hprd:01402;humancyc:HS05157-MONOMER;intact:EBI-3920254;kegg:hsa:5471;reactome:R-HSA-62496;reactome:R-HSA-73817;refseq:NM_002703;refseq:NP_002694;refseq:XM_011534387;unigene:311;uniprot:A8K4H7;uniprot:PUR1_HUMAN;uniprot:Q06203;uniprot:Q59G63	physical interactor	373670	protein interaction	Biogrid	26344197
52413	UBA1	protein	dip:DIP-33686N;ensembl:ENSG00000130985;ensembl:ENSP00000338413;ensembl:ENSP00000366568;ensembl:ENST00000335972;ensembl:ENST00000377351;entrez-gene:7317;hgnc-id:12469;hgnc-symbol:UBA1;hgnc-symbol:UBE1;hprd:02440;humancyc:HS05465-MONOMER;intact:EBI-709688;pdb:4P22;pdb:6DC6;reactome:R-HSA-8852116;reactome:R-HSA-8866652;reactome:R-HSA-947698;reactome:R-HSA-983168;refseq:NM_003334;refseq:NM_153280;ref…	physical interactor	233140	TXLNG	protein	ensembl:ENSG00000086712;ensembl:ENSP00000369465;ensembl:ENSP00000381222;ensembl:ENST00000380122;ensembl:ENST00000398155;entrez-gene:55787;hgnc-id:18578;hprd:06478;intact:EBI-3445062;refseq:NM_001168683;refseq:NM_018360;refseq:NP_001162154;refseq:NP_060830;refseq:XM_005274558;refseq:XM_017029631;refseq:XP_016885120;uniprot:Q2KQ75;uniprot:Q5JNZ7;uniprot:Q9NUQ3;uniprot:Q9P0X1;uniprot:TXLNG_HUMAN	physical interactor	302644	protein interaction	Biogrid	22939629
434671	SEPTIN6	protein	dip:DIP-38218N;ensembl:ENSG00000125354;ensembl:ENSP00000341524;ensembl:ENSP00000346169;ensembl:ENSP00000353278;ensembl:ENSP00000378108;ensembl:ENSP00000418715;ensembl:ENSP00000435818;ensembl:ENST00000343984;ensembl:ENST00000354228;ensembl:ENST00000360156;ensembl:ENST00000394610;ensembl:ENST00000460411;ensembl:ENST00000489216;entrez-gene:23157;hgnc-id:15848;hgnc-symbol:SEPT6;hprd:06716;intact:EBI-…	physical interactor	37795	SH3KBP1	protein	dip:DIP-31803N;ensembl:ENSG00000147010;ensembl:ENSP00000369020;ensembl:ENSP00000369039;ensembl:ENSP00000380921;ensembl:ENST00000379698;ensembl:ENST00000379716;ensembl:ENST00000397821;entrez-gene:30011;hgnc-id:13867;hgnc-symbol:SH3KBP1;hprd:02301;intact:EBI-346595;pdb:2BZ8;pdb:2K6D;pdb:2K9G;pdb:2N64;pdb:2O2O;pdb:2YDL;pdb:5ABS;reactome:R-HSA-182926;reactome:R-HSA-182955;reactome:R-HSA-182957;reacto…	physical interactor	278608	protein interaction	Biogrid	19531213;25472714
3023150	ANKRD11	gene	ensembl:ENSP00000301030;ensembl:ENSP00000367581;entrez-gene:29123;hgnc-id:21316;hprd:12456;refseq:NM_001256182;refseq:NM_001256183;refseq:NM_013275;refseq:XM_006721181;refseq:XM_006721182;refseq:XM_006721183;refseq:XM_006721184;refseq:XP_006721246;uniprot:Q6UB99	physical interactor	529693	q69yn44	protein	ensembl:ENSG00000164944;ensembl:ENSP00000297591;ensembl:ENSP00000398390;ensembl:ENST00000297591;ensembl:ENST00000421249;entrez-gene:25962;hgnc-id:24500;hgnc-symbol:KIAA1429;hprd:10889;intact:EBI-18054817;intact:EBI-21586473;intact:EBI-2819293;refseq:NM_015496;refseq:NM_183009;refseq:NP_056311;refseq:NP_892121;refseq:XM_017013306;refseq:XM_017013307;refseq:XM_017013308;refseq:XP_016868795;uniprot:…	physical interactor	511216	protein interaction	Biogrid	29507755
133908	DDX3X	protein	dip:DIP-27551N;ensembl:ENSG00000215301;ensembl:ENSP00000382840;ensembl:ENSP00000392494;ensembl:ENSP00000478443;ensembl:ENSP00000486516;ensembl:ENSP00000486720;ensembl:ENSP00000487224;ensembl:ENSP00000494040;ensembl:ENST00000457138;ensembl:ENST00000478993;ensembl:ENST00000629496;ensembl:ENST00000629785;ensembl:ENST00000630255;ensembl:ENST00000644876;entrez-gene:1654;hgnc-id:2745;hgnc-symbol:DDX3X;…	physical interactor	51388	TBK1	protein	dip:DIP-27529N;ensembl:ENSG00000183735;ensembl:ENSP00000329967;ensembl:ENSP00000498995;ensembl:ENST00000331710;ensembl:ENST00000650790;entrez-gene:29110;hgnc-id:11584;hgnc-symbol:TBK1;hprd:05322;humancyc:HS00020-MONOMER;intact:EBI-1383470;intact:EBI-356402;intact:EBI-5773956;pdb:4EFO;pdb:4EUT;pdb:4EUU;pdb:4IM0;pdb:4IM2;pdb:4IM3;pdb:4IW0;pdb:4IWO;pdb:4IWP;pdb:4IWQ;pdb:5EOA;pdb:5EOF;pdb:5EP6;pdb:5W…	physical interactor	205013	protein interaction	IntAct;MINT;Spike	18583960
37795	SH3KBP1	protein	dip:DIP-31803N;ensembl:ENSG00000147010;ensembl:ENSP00000369020;ensembl:ENSP00000369039;ensembl:ENSP00000380921;ensembl:ENST00000379698;ensembl:ENST00000379716;ensembl:ENST00000397821;entrez-gene:30011;hgnc-id:13867;hgnc-symbol:SH3KBP1;hprd:02301;intact:EBI-346595;pdb:2BZ8;pdb:2K6D;pdb:2K9G;pdb:2N64;pdb:2O2O;pdb:2YDL;pdb:5ABS;reactome:R-HSA-182926;reactome:R-HSA-182955;reactome:R-HSA-182957;reacto…	physical interactor	55664	WIPF2	protein	ensembl:ENSG00000171475;ensembl:ENSP00000320924;ensembl:ENSP00000462350;ensembl:ENSP00000462826;ensembl:ENST00000323571;ensembl:ENST00000583130;ensembl:ENST00000585043;entrez-gene:147179;hgnc-id:30923;hprd:18304;intact:EBI-2850112;reactome:R-HSA-2029482;reactome:R-HSA-2197666;reactome:R-HSA-5663213;reactome:R-HSA-9664422;refseq:NM_133264;refseq:NP_573571;refseq:XM_005257083;refseq:XM_005257084;re…	physical interactor	278595	protein interaction	Biogrid	19531213
482298	HTATSF1	protein	dip:DIP-42095N;ensembl:ENSG00000102241;ensembl:ENSP00000218364;ensembl:ENSP00000442699;ensembl:ENST00000218364;ensembl:ENST00000535601;entrez-gene:27336;hgnc-id:5276;hgnc-symbol:HTATSF1;hprd:02282;intact:EBI-720468;pdb:2DIT;pdb:6N3D;pdb:6N3E;pdb:6N3F;pdb:6NSX;pdb:6Y50;pdb:6Y53;pdb:6Y5Q;refseq:NM_001163280;refseq:NM_014500;refseq:NP_001156752;refseq:NP_055315;refseq:XM_005262404;refseq:XP_00526246…	physical interactor	8101	APBB1	protein	dip:DIP-30903N;ensembl:ENSG00000166313;ensembl:ENSP00000299402;ensembl:ENSP00000311912;ensembl:ENSP00000433338;ensembl:ENSP00000476442;ensembl:ENSP00000476646;ensembl:ENSP00000476846;ensembl:ENSP00000476871;ensembl:ENSP00000477069;ensembl:ENSP00000477213;ensembl:ENST00000299402;ensembl:ENST00000311051;ensembl:ENST00000530885;ensembl:ENST00000608394;ensembl:ENST00000608645;ensembl:ENST00000608655;…	physical interactor	319923	protein interaction	Biogrid	16055720
14757	RBBP7	protein	dip:DIP-436N;ensembl:ENSG00000102054;ensembl:ENSP00000369424;ensembl:ENSP00000369427;ensembl:ENST00000380084;ensembl:ENST00000380087;entrez-gene:5931;hgnc-id:9890;hgnc-symbol:RBBP7;hprd:04231;intact:EBI-3505029;intact:EBI-352227;pdb:3CFS;pdb:3CFV;reactome:R-HSA-212227;reactome:R-HSA-212300;reactome:R-HSA-2559580;reactome:R-HSA-3214815;reactome:R-HSA-3214841;reactome:R-HSA-3214847;reactome:R-HSA-3…	physical interactor	41336	MTF2	protein	ensembl:ENSG00000143033;ensembl:ENSP00000359321;ensembl:ENSP00000359326;ensembl:ENSP00000443295;ensembl:ENSP00000444962;ensembl:ENST00000370298;ensembl:ENST00000370303;ensembl:ENST00000540243;ensembl:ENST00000545708;entrez-gene:22823;hgnc-id:29535;hgnc-symbol:MTF2;hprd:14342;intact:EBI-10698053;intact:EBI-11028207;intact:EBI-725816;pdb:5XFR;reactome:R-HSA-212300;reactome:R-HSA-5084119;refseq:NC_0…	physical interactor	221031	protein interaction	Biogrid;MINT	24981860;26186194;27705803;28514442
37795	SH3KBP1	protein	dip:DIP-31803N;ensembl:ENSG00000147010;ensembl:ENSP00000369020;ensembl:ENSP00000369039;ensembl:ENSP00000380921;ensembl:ENST00000379698;ensembl:ENST00000379716;ensembl:ENST00000397821;entrez-gene:30011;hgnc-id:13867;hgnc-symbol:SH3KBP1;hprd:02301;intact:EBI-346595;pdb:2BZ8;pdb:2K6D;pdb:2K9G;pdb:2N64;pdb:2O2O;pdb:2YDL;pdb:5ABS;reactome:R-HSA-182926;reactome:R-HSA-182955;reactome:R-HSA-182957;reacto…	physical interactor	485304	bhlh9_human	protein	ensembl:ENSG00000198908;ensembl:ENSP00000354675;ensembl:ENSP00000361820;ensembl:ENSP00000391722;ensembl:ENSP00000403226;ensembl:ENSP00000405893;ensembl:ENST00000361229;ensembl:ENST00000372735;ensembl:ENST00000447531;ensembl:ENST00000448867;ensembl:ENST00000457056;entrez-gene:80823;hgnc-id:29353;hprd:10028;intact:EBI-11519926;refseq:NM_001142524;refseq:NM_001142525;refseq:NM_001142526;refseq:NM_00…	physical interactor	87247	protein interaction	Biogrid;IntAct	32296183;unassigned1304
242536	RNF128	gene	entrez-gene:79589;uniprot:Q8TEB7	transcribed gene	116197	RNF128	protein	ensembl:ENSG00000133135;ensembl:ENSP00000255499;ensembl:ENSP00000316127;ensembl:ENST00000255499;ensembl:ENST00000324342;entrez-gene:79589;hgnc-id:21153;hprd:02340;intact:EBI-2341619;pdb:3ICU;reactome:R-HSA-5689880;reactome:R-HSA-5689896;reactome:R-HSA-5690147;reactome:R-HSA-6782813;refseq:NM_024539;refseq:NM_194463;refseq:NP_078815;refseq:NP_919445;uniprot:A0PJI4;uniprot:Q6PH80;uniprot:Q6ZTJ8;uni…	product	34320	gene regulatory interaction	PID	12705856;14973438
36496	RPS6KA4	protein	ensembl:ENSG00000162302;ensembl:ENSP00000333896;ensembl:ENSP00000435580;ensembl:ENST00000334205;entrez-gene:8986;hgnc-id:10433;hgnc-symbol:RPS6KA4;hprd:04677;humancyc:HS08656-MONOMER;intact:EBI-21622593;intact:EBI-73933;reactome:R-HSA-437239;reactome:R-HSA-772527;refseq:NM_001006944;refseq:NM_001300802;refseq:NM_001318361;refseq:NM_003942;refseq:NP_001006945;refseq:NP_001287731;refseq:NP_00130529…	enzyme	51388	TBK1	protein	dip:DIP-27529N;ensembl:ENSG00000183735;ensembl:ENSP00000329967;ensembl:ENSP00000498995;ensembl:ENST00000331710;ensembl:ENST00000650790;entrez-gene:29110;hgnc-id:11584;hgnc-symbol:TBK1;hprd:05322;humancyc:HS00020-MONOMER;intact:EBI-1383470;intact:EBI-356402;intact:EBI-5773956;pdb:4EFO;pdb:4EUT;pdb:4EUU;pdb:4IM0;pdb:4IM2;pdb:4IM3;pdb:4IW0;pdb:4IWO;pdb:4IWP;pdb:4IWQ;pdb:5EOA;pdb:5EOF;pdb:5EP6;pdb:5W…	enzyme	29236;36826	biochemical reaction	HumanCyc;InnateDB;NetPath;PID;PhosphoPOINT;PhosphoSitePlus;Spike	10521409;10662544;10811867;10938077;11027313;11157486;11259436;11359840;11533489;11742864;11884528;11931769;12230568;12242023;12368228;12419817;12444159;12628924;12672017;12716675;12742080;12759443;12767944;12840022;12842894;12881425;14560022;14600157;14690596;14963024;14996729;15016307;15086905;15100319;15128824;15147869;15171702;15192014;15210811;15252041;15280197;15334063;15465828;15483224;154…
3261557	ZFX	rna	ensembl:ENSP00000368475;ensembl:ENSP00000368486;ensembl:ENSP00000438233;entrez-gene:7543;hgnc-id:12869;hprd:02445;refseq:NM_001178084;refseq:NM_001178085;refseq:NM_001178086;refseq:NM_001178095;refseq:NM_001330327;refseq:NM_003410;refseq:XM_005274591;refseq:XM_005274592;refseq:XM_005274594;refseq:XM_006724513;refseq:XM_006724514;refseq:XM_006724515;refseq:XM_011545579;refseq:XM_011545581;refseq:X…	physical interactor	529693	q69yn44	protein	ensembl:ENSG00000164944;ensembl:ENSP00000297591;ensembl:ENSP00000398390;ensembl:ENST00000297591;ensembl:ENST00000421249;entrez-gene:25962;hgnc-id:24500;hgnc-symbol:KIAA1429;hprd:10889;intact:EBI-18054817;intact:EBI-21586473;intact:EBI-2819293;refseq:NM_015496;refseq:NM_183009;refseq:NP_056311;refseq:NP_892121;refseq:XM_017013306;refseq:XM_017013307;refseq:XM_017013308;refseq:XP_016868795;uniprot:…	physical interactor	511507	protein interaction	Biogrid	29507755
55664	WIPF2	protein	ensembl:ENSG00000171475;ensembl:ENSP00000320924;ensembl:ENSP00000462350;ensembl:ENSP00000462826;ensembl:ENST00000323571;ensembl:ENST00000583130;ensembl:ENST00000585043;entrez-gene:147179;hgnc-id:30923;hprd:18304;intact:EBI-2850112;reactome:R-HSA-2029482;reactome:R-HSA-2197666;reactome:R-HSA-5663213;reactome:R-HSA-9664422;refseq:NM_133264;refseq:NP_573571;refseq:XM_005257083;refseq:XM_005257084;re…	physical interactor	450595	SLC4A1AP	protein	ensembl:ENSG00000163798;ensembl:ENSP00000323837;ensembl:ENSP00000479964;ensembl:ENST00000326019;ensembl:ENST00000613058;entrez-gene:22950;hgnc-id:13813;hgnc-symbol:SLC4A1AP;hprd:04038;intact:EBI-1999704;pdb:4H87;refseq:NC_000002;refseq:NM_018158;refseq:NP_060628;uniprot:A6NJ39;uniprot:NADAP_HUMAN;uniprot:Q4KMT1;uniprot:Q4KMX0;uniprot:Q7Z5Q9;uniprot:Q9BWU0;uniprot:Q9NVN2	physical interactor	298430	protein interaction	Biogrid	22939629
70925	HSPH1	protein	ensembl:ENSG00000120694;ensembl:ENSP00000318687;ensembl:ENSP00000369768;ensembl:ENSP00000396090;ensembl:ENSP00000487365;ensembl:ENST00000320027;ensembl:ENST00000380405;ensembl:ENST00000630972;entrez-gene:10808;hgnc-id:16969;hgnc-symbol:HSPH1;hprd:09990;intact:EBI-2859494;intact:EBI-356829;pdb:6GFA;reactome:R-HSA-3000484;reactome:R-HSA-3221883;reactome:R-HSA-3221904;reactome:R-HSA-3299412;reactome…	physical interactor	90486	RPS6KB2	protein	ensembl:ENSG00000175634;ensembl:ENSP00000308413;ensembl:ENSP00000432847;ensembl:ENST00000312629;ensembl:ENST00000528964;entrez-gene:6199;hgnc-id:10437;hgnc-symbol:RPS6KB2;hprd:10203;humancyc:HS10964-MONOMER;intact:EBI-3905921;intact:EBI-5773494;reactome:R-HSA-198693;reactome:R-HSA-199844;reactome:R-HSA-199877;reactome:R-HSA-5674400;refseq:NM_003952;refseq:NP_001007072;refseq:NP_003943;refseq:XM_0…	physical interactor	364912	protein interaction	Biogrid	25324306
12405	USP9X	protein	dip:DIP-27562N;ensembl:ENSG00000124486;ensembl:ENSP00000316357;ensembl:ENSP00000367558;entrez-gene:8239;hgnc-id:12632;hgnc-symbol:USP9X;hprd:02091;humancyc:HS04777-MONOMER;intact:EBI-1058656;intact:EBI-10964523;intact:EBI-302524;reactome:R-HSA-870499;refseq:NM_001039590;refseq:NM_001039591;refseq:NM_004652;refseq:NM_021906;refseq:NP_001034680;refseq:NP_004643;refseq:NP_068706;refseq:XM_005272675;…	physical interactor	464214	UBL7	protein	ensembl:ENSG00000138629;ensembl:ENSG00000288408;ensembl:ENSP00000354883;ensembl:ENSP00000378518;ensembl:ENSP00000454828;ensembl:ENSP00000457703;ensembl:ENSP00000457708;ensembl:ENSP00000500164;ensembl:ENSP00000500266;ensembl:ENSP00000500442;ensembl:ENSP00000500520;ensembl:ENSP00000500882;ensembl:ENST00000361351;ensembl:ENST00000395081;ensembl:ENST00000564488;ensembl:ENST00000565335;ensembl:ENST000…	physical interactor	300079	protein interaction	Biogrid	22939629
11023	PRPS2	protein	ensembl:ENSG00000101911;ensembl:ENSP00000370043;ensembl:ENSP00000381504;ensembl:ENST00000380668;ensembl:ENST00000398491;entrez-gene:5634;hgnc-id:9465;hprd:02414;humancyc:HS02317-MONOMER;intact:EBI-12063547;intact:EBI-4290895;kegg:hsa:5634;reactome:R-HSA-58224;reactome:R-HSA-73843;refseq:NM_001039091;refseq:NM_002765;refseq:NP_001034180;refseq:NP_002756;unigene:2910;uniprot:P11908;uniprot:PRPS2_HU…	physical interactor	507245	rmc1_human	protein	ensembl:ENSG00000141452;ensembl:ENSP00000269221;ensembl:ENSP00000482573;ensembl:ENST00000269221;entrez-gene:29919;hgnc-id:24326;hprd:12693;intact:EBI-2804848;refseq:NM_001276342;refseq:NM_001318707;refseq:NM_001318708;refseq:NM_001318709;refseq:NM_013326;refseq:NP_001305636;refseq:NP_001305637;refseq:NP_001305638;refseq:NP_037458;refseq:XM_006722445;refseq:XM_011525939;refseq:XM_017025717;refseq:…	physical interactor	298498	protein interaction	Biogrid	22939629
133908	DDX3X	protein	dip:DIP-27551N;ensembl:ENSG00000215301;ensembl:ENSP00000382840;ensembl:ENSP00000392494;ensembl:ENSP00000478443;ensembl:ENSP00000486516;ensembl:ENSP00000486720;ensembl:ENSP00000487224;ensembl:ENSP00000494040;ensembl:ENST00000457138;ensembl:ENST00000478993;ensembl:ENST00000629496;ensembl:ENST00000629785;ensembl:ENST00000630255;ensembl:ENST00000644876;entrez-gene:1654;hgnc-id:2745;hgnc-symbol:DDX3X;…	physical interactor	7872	IMPDH2	protein	ensembl:ENSG00000178035;ensembl:ENSP00000321584;ensembl:ENST00000326739;entrez-gene:3615;hgnc-id:6053;hgnc-symbol:IMPDH2;hprd:00895;humancyc:HS11242-MONOMER;intact:EBI-353389;kegg:hsa:3615;pdb:1B3O;pdb:1NF7;pdb:1NFB;pdb:6I0M;pdb:6I0O;pdb:6U8E;pdb:6U8N;pdb:6U8R;pdb:6U8S;pdb:6U9O;pdb:6UA2;pdb:6UA4;pdb:6UA5;pdb:6UAJ;pdb:6UC2;pdb:6UDO;pdb:6UDP;pdb:6UDQ;reactome:R-HSA-57350;reactome:R-HSA-6798695;reac…	physical interactor	368804	protein interaction	Biogrid	26344197
133908	DDX3X	protein	dip:DIP-27551N;ensembl:ENSG00000215301;ensembl:ENSP00000382840;ensembl:ENSP00000392494;ensembl:ENSP00000478443;ensembl:ENSP00000486516;ensembl:ENSP00000486720;ensembl:ENSP00000487224;ensembl:ENSP00000494040;ensembl:ENST00000457138;ensembl:ENST00000478993;ensembl:ENST00000629496;ensembl:ENST00000629785;ensembl:ENST00000630255;ensembl:ENST00000644876;entrez-gene:1654;hgnc-id:2745;hgnc-symbol:DDX3X;…	physical interactor	8202	KDM4B	protein	dip:DIP-47283N;ensembl:ENSG00000127663;ensembl:ENSP00000159111;ensembl:ENSP00000371178;ensembl:ENSP00000480642;ensembl:ENST00000381759;entrez-gene:23030;hgnc-id:29136;hprd:11056;intact:EBI-725902;pdb:4LXL;pdb:4UC4;reactome:R-HSA-3214396;reactome:R-HSA-3214842;reactome:R-HSA-5683074;reactome:R-HSA-5693565;reactome:R-HSA-9011732;reactome:R-HSA-9018519;refseq:NM_015015;refseq:NP_055830;refseq:XM_005…	physical interactor	368805	protein interaction	Biogrid	26344197
232905	TCF4/beta catenin	complex		transcription factor	248429	ZCCHC12	gene	entrez-gene:170261;uniprot:Q6PEW1	transcribed gene	34339	gene regulatory interaction	PID	19816403;20128690
453622	NXT2	protein	ensembl:ENSG00000101888;ensembl:ENSP00000218004;ensembl:ENSP00000361175;ensembl:ENSP00000361178;ensembl:ENSP00000361179;ensembl:ENST00000218004;ensembl:ENST00000372103;ensembl:ENST00000372106;ensembl:ENST00000372107;entrez-gene:55916;hgnc-id:18151;hgnc-symbol:NXT2;hprd:02264;intact:EBI-21528382;intact:EBI-752122;refseq:NM_001242617;refseq:NM_001242618;refseq:NM_018698;refseq:NP_001229546;refseq:N…	physical interactor	499210	rasfa_human	protein	ensembl:ENSG00000189431;ensembl:ENSP00000485526;ensembl:ENST00000529419;entrez-gene:644943;hgnc-id:33984;intact:EBI-6912267;refseq:NM_001080521;refseq:NP_001073990;uniprot:A6NK89;uniprot:RASFA_HUMAN	physical interactor	133614	protein interaction	Biogrid;IntAct	32296183;unassigned1304
221025	NRK	protein	ensembl:ENSG00000123572;ensembl:ENSP00000434830;entrez-gene:203447;hgnc-id:25391;hgnc-symbol:NRK;hprd:14841;humancyc:HS04674-MONOMER;humancyc:HS14663-MONOMER;refseq:NM_198465;refseq:NP_940867;refseq:XM_006724631;refseq:XM_006724632;refseq:XM_006724633;refseq:XM_006724634;uniprot:NRK_HUMAN;uniprot:Q32ND6;uniprot:Q5H9K2;uniprot:Q6ZMP2;uniprot:Q7Z2Y5	enzyme	36496	RPS6KA4	protein	ensembl:ENSG00000162302;ensembl:ENSP00000333896;ensembl:ENSP00000435580;ensembl:ENST00000334205;entrez-gene:8986;hgnc-id:10433;hgnc-symbol:RPS6KA4;hprd:04677;humancyc:HS08656-MONOMER;intact:EBI-21622593;intact:EBI-73933;reactome:R-HSA-437239;reactome:R-HSA-772527;refseq:NM_001006944;refseq:NM_001300802;refseq:NM_001318361;refseq:NM_003942;refseq:NP_001006945;refseq:NP_001287731;refseq:NP_00130529…	enzyme	29236	biochemical reaction	HumanCyc	10662544;8774846
221025	NRK	protein	ensembl:ENSG00000123572;ensembl:ENSP00000434830;entrez-gene:203447;hgnc-id:25391;hgnc-symbol:NRK;hprd:14841;humancyc:HS04674-MONOMER;humancyc:HS14663-MONOMER;refseq:NM_198465;refseq:NP_940867;refseq:XM_006724631;refseq:XM_006724632;refseq:XM_006724633;refseq:XM_006724634;uniprot:NRK_HUMAN;uniprot:Q32ND6;uniprot:Q5H9K2;uniprot:Q6ZMP2;uniprot:Q7Z2Y5	enzyme	90486	RPS6KB2	protein	ensembl:ENSG00000175634;ensembl:ENSP00000308413;ensembl:ENSP00000432847;ensembl:ENST00000312629;ensembl:ENST00000528964;entrez-gene:6199;hgnc-id:10437;hgnc-symbol:RPS6KB2;hprd:10203;humancyc:HS10964-MONOMER;intact:EBI-3905921;intact:EBI-5773494;reactome:R-HSA-198693;reactome:R-HSA-199844;reactome:R-HSA-199877;reactome:R-HSA-5674400;refseq:NM_003952;refseq:NP_001007072;refseq:NP_003943;refseq:XM_0…	enzyme	29236	biochemical reaction	HumanCyc	10662544;8774846
482298	HTATSF1	protein	dip:DIP-42095N;ensembl:ENSG00000102241;ensembl:ENSP00000218364;ensembl:ENSP00000442699;ensembl:ENST00000218364;ensembl:ENST00000535601;entrez-gene:27336;hgnc-id:5276;hgnc-symbol:HTATSF1;hprd:02282;intact:EBI-720468;pdb:2DIT;pdb:6N3D;pdb:6N3E;pdb:6N3F;pdb:6NSX;pdb:6Y50;pdb:6Y53;pdb:6Y5Q;refseq:NM_001163280;refseq:NM_014500;refseq:NP_001156752;refseq:NP_055315;refseq:XM_005262404;refseq:XP_00526246…	physical interactor	529693	q69yn44	protein	ensembl:ENSG00000164944;ensembl:ENSP00000297591;ensembl:ENSP00000398390;ensembl:ENST00000297591;ensembl:ENST00000421249;entrez-gene:25962;hgnc-id:24500;hgnc-symbol:KIAA1429;hprd:10889;intact:EBI-18054817;intact:EBI-21586473;intact:EBI-2819293;refseq:NM_015496;refseq:NM_183009;refseq:NP_056311;refseq:NP_892121;refseq:XM_017013306;refseq:XM_017013307;refseq:XM_017013308;refseq:XP_016868795;uniprot:…	physical interactor	514154	protein interaction	Biogrid	29507755
31481	RPS6KA3	protein	dip:DIP-38247N;ensembl:ENSG00000177189;ensembl:ENSP00000368884;ensembl:ENST00000379565;entrez-gene:6197;hgnc-id:10432;hgnc-symbol:RPS6KA3;hprd:02092;humancyc:HS11136-MONOMER;intact:EBI-1046616;pdb:4D9T;pdb:4D9U;pdb:4JG6;pdb:4JG7;pdb:4JG8;pdb:4NUS;pdb:4NW5;pdb:4NW6;pdb:5D9K;pdb:5D9L;reactome:R-HSA-198753;reactome:R-HSA-199830;reactome:R-HSA-199869;reactome:R-HSA-199920;reactome:R-HSA-2559582;react…	enzyme	221025	NRK	protein	ensembl:ENSG00000123572;ensembl:ENSP00000434830;entrez-gene:203447;hgnc-id:25391;hgnc-symbol:NRK;hprd:14841;humancyc:HS04674-MONOMER;humancyc:HS14663-MONOMER;refseq:NM_198465;refseq:NP_940867;refseq:XM_006724631;refseq:XM_006724632;refseq:XM_006724633;refseq:XM_006724634;uniprot:NRK_HUMAN;uniprot:Q32ND6;uniprot:Q5H9K2;uniprot:Q6ZMP2;uniprot:Q7Z2Y5	enzyme	29236	biochemical reaction	HumanCyc	10662544;8774846
31481	RPS6KA3	protein	dip:DIP-38247N;ensembl:ENSG00000177189;ensembl:ENSP00000368884;ensembl:ENST00000379565;entrez-gene:6197;hgnc-id:10432;hgnc-symbol:RPS6KA3;hprd:02092;humancyc:HS11136-MONOMER;intact:EBI-1046616;pdb:4D9T;pdb:4D9U;pdb:4JG6;pdb:4JG7;pdb:4JG8;pdb:4NUS;pdb:4NW5;pdb:4NW6;pdb:5D9K;pdb:5D9L;reactome:R-HSA-198753;reactome:R-HSA-199830;reactome:R-HSA-199869;reactome:R-HSA-199920;reactome:R-HSA-2559582;react…	enzyme	51388	TBK1	protein	dip:DIP-27529N;ensembl:ENSG00000183735;ensembl:ENSP00000329967;ensembl:ENSP00000498995;ensembl:ENST00000331710;ensembl:ENST00000650790;entrez-gene:29110;hgnc-id:11584;hgnc-symbol:TBK1;hprd:05322;humancyc:HS00020-MONOMER;intact:EBI-1383470;intact:EBI-356402;intact:EBI-5773956;pdb:4EFO;pdb:4EUT;pdb:4EUU;pdb:4IM0;pdb:4IM2;pdb:4IM3;pdb:4IW0;pdb:4IWO;pdb:4IWP;pdb:4IWQ;pdb:5EOA;pdb:5EOF;pdb:5EP6;pdb:5W…	enzyme	29236;33503;33901;36826;45769	biochemical reaction	BioCarta;HumanCyc;InnateDB;Manual upload;NetPath;PID;PhosphoPOINT;PhosphoSitePlus;Spike	10066435;10074115;10085062;10096573;10329681;10398585;10421793;10428798;10437795;10469655;10521409;10527519;10571988;10644755;10662544;10722693;10723127;10754328;10764587;10783893;10807933;10811867;10823818;10882136;10889159;10938077;10949034;10990461;11027313;11042193;11057907;11083859;11106428;11108261;11139588;11145737;11157486;11158290;11231305;11259436;11266466;11297557;11350057;11359840;113…
146191	ZRSR2	protein	dip:DIP-62117N;ensembl:ENSG00000169249;ensembl:ENSP00000303015;ensembl:ENST00000307771;entrez-gene:8233;hgnc-id:23019;hprd:02068;intact:EBI-6657923;reactome:R-HSA-72165;reactome:R-HSA-8865914;refseq:NM_005089;refseq:NP_005080;refseq:XM_005274597;refseq:XM_006724519;refseq:XM_006724520;refseq:XM_011545589;refseq:XM_017029881;uniprot:Q14D69;uniprot:Q15696;uniprot:U2AFM_HUMAN	physical interactor	450595	SLC4A1AP	protein	ensembl:ENSG00000163798;ensembl:ENSP00000323837;ensembl:ENSP00000479964;ensembl:ENST00000326019;ensembl:ENST00000613058;entrez-gene:22950;hgnc-id:13813;hgnc-symbol:SLC4A1AP;hprd:04038;intact:EBI-1999704;pdb:4H87;refseq:NC_000002;refseq:NM_018158;refseq:NP_060628;uniprot:A6NJ39;uniprot:NADAP_HUMAN;uniprot:Q4KMT1;uniprot:Q4KMX0;uniprot:Q7Z5Q9;uniprot:Q9BWU0;uniprot:Q9NVN2	physical interactor	362299	protein interaction	Biogrid	26186194;28514442
46019	HPRT1	protein	ensembl:ENSG00000165704;ensembl:ENSP00000298556;ensembl:ENST00000298556;entrez-gene:3251;hgnc-id:5157;hprd:02388;humancyc:HS09275-MONOMER;intact:EBI-748210;kegg:hsa:3251;pdb:1BZY;pdb:1D6N;pdb:1HMP;pdb:1Z7G;pdb:2VFA;pdb:3GEP;pdb:3GGC;pdb:3GGJ;pdb:4IJQ;pdb:4KN6;pdb:4RAB;pdb:4RAC;pdb:4RAD;pdb:4RAN;pdb:4RAO;pdb:4RAQ;pdb:5BRN;pdb:5BSK;pdb:5HIA;pdb:5W8V;pdb:6BNJ;reactome:R-HSA-56639;reactome:R-HSA-7421…	physical interactor	492429	sr1ip_human	protein	ensembl:ENSG00000153006;ensembl:ENSP00000427401;ensembl:ENST00000513458;entrez-gene:285672;hgnc-id:26716;hprd:08210;intact:EBI-10268630;refseq:NM_173829;refseq:NP_776190;uniprot:Q32NC8;uniprot:Q8N9Q2;uniprot:SR1IP_HUMAN	physical interactor	133262	protein interaction	Biogrid;IntAct	32296183;unassigned1304
12405	USP9X	protein	dip:DIP-27562N;ensembl:ENSG00000124486;ensembl:ENSP00000316357;ensembl:ENSP00000367558;entrez-gene:8239;hgnc-id:12632;hgnc-symbol:USP9X;hprd:02091;humancyc:HS04777-MONOMER;intact:EBI-1058656;intact:EBI-10964523;intact:EBI-302524;reactome:R-HSA-870499;refseq:NM_001039590;refseq:NM_001039591;refseq:NM_004652;refseq:NM_021906;refseq:NP_001034680;refseq:NP_004643;refseq:NP_068706;refseq:XM_005272675;…	physical interactor	529693	q69yn44	protein	ensembl:ENSG00000164944;ensembl:ENSP00000297591;ensembl:ENSP00000398390;ensembl:ENST00000297591;ensembl:ENST00000421249;entrez-gene:25962;hgnc-id:24500;hgnc-symbol:KIAA1429;hprd:10889;intact:EBI-18054817;intact:EBI-21586473;intact:EBI-2819293;refseq:NM_015496;refseq:NM_183009;refseq:NP_056311;refseq:NP_892121;refseq:XM_017013306;refseq:XM_017013307;refseq:XM_017013308;refseq:XP_016868795;uniprot:…	physical interactor	513676	protein interaction	Biogrid	29507755
529693	q69yn44	protein	ensembl:ENSG00000164944;ensembl:ENSP00000297591;ensembl:ENSP00000398390;ensembl:ENST00000297591;ensembl:ENST00000421249;entrez-gene:25962;hgnc-id:24500;hgnc-symbol:KIAA1429;hprd:10889;intact:EBI-18054817;intact:EBI-21586473;intact:EBI-2819293;refseq:NM_015496;refseq:NM_183009;refseq:NP_056311;refseq:NP_892121;refseq:XM_017013306;refseq:XM_017013307;refseq:XM_017013308;refseq:XP_016868795;uniprot:…	physical interactor	124144	GEMIN5	protein	ensembl:ENSG00000082516;ensembl:ENSP00000285873;ensembl:ENST00000285873;entrez-gene:25929;hgnc-id:20043;hgnc-symbol:GEMIN5;hprd:06109;intact:EBI-443630;pdb:5GXH;pdb:5GXI;pdb:5H1J;pdb:5H1K;pdb:5H1L;pdb:5H1M;pdb:5H3S;pdb:5H3T;pdb:5H3U;pdb:5TEE;pdb:5TEF;pdb:5THA;pdb:6RNQ;pdb:6RNS;reactome:R-HSA-191765;reactome:R-HSA-191833;reactome:R-HSA-191859;refseq:NM_001252156;refseq:NM_015465;refseq:NP_00123908…	physical interactor	513590	protein interaction	Biogrid	29507755
221025	NRK	protein	ensembl:ENSG00000123572;ensembl:ENSP00000434830;entrez-gene:203447;hgnc-id:25391;hgnc-symbol:NRK;hprd:14841;humancyc:HS04674-MONOMER;humancyc:HS14663-MONOMER;refseq:NM_198465;refseq:NP_940867;refseq:XM_006724631;refseq:XM_006724632;refseq:XM_006724633;refseq:XM_006724634;uniprot:NRK_HUMAN;uniprot:Q32ND6;uniprot:Q5H9K2;uniprot:Q6ZMP2;uniprot:Q7Z2Y5	enzyme	51388	TBK1	protein	dip:DIP-27529N;ensembl:ENSG00000183735;ensembl:ENSP00000329967;ensembl:ENSP00000498995;ensembl:ENST00000331710;ensembl:ENST00000650790;entrez-gene:29110;hgnc-id:11584;hgnc-symbol:TBK1;hprd:05322;humancyc:HS00020-MONOMER;intact:EBI-1383470;intact:EBI-356402;intact:EBI-5773956;pdb:4EFO;pdb:4EUT;pdb:4EUU;pdb:4IM0;pdb:4IM2;pdb:4IM3;pdb:4IW0;pdb:4IWO;pdb:4IWP;pdb:4IWQ;pdb:5EOA;pdb:5EOF;pdb:5EP6;pdb:5W…	enzyme	29236	biochemical reaction	HumanCyc	10662544;8774846
133908	DDX3X	protein	dip:DIP-27551N;ensembl:ENSG00000215301;ensembl:ENSP00000382840;ensembl:ENSP00000392494;ensembl:ENSP00000478443;ensembl:ENSP00000486516;ensembl:ENSP00000486720;ensembl:ENSP00000487224;ensembl:ENSP00000494040;ensembl:ENST00000457138;ensembl:ENST00000478993;ensembl:ENST00000629496;ensembl:ENST00000629785;ensembl:ENST00000630255;ensembl:ENST00000644876;entrez-gene:1654;hgnc-id:2745;hgnc-symbol:DDX3X;…	physical interactor	90486	RPS6KB2	protein	ensembl:ENSG00000175634;ensembl:ENSP00000308413;ensembl:ENSP00000432847;ensembl:ENST00000312629;ensembl:ENST00000528964;entrez-gene:6199;hgnc-id:10437;hgnc-symbol:RPS6KB2;hprd:10203;humancyc:HS10964-MONOMER;intact:EBI-3905921;intact:EBI-5773494;reactome:R-HSA-198693;reactome:R-HSA-199844;reactome:R-HSA-199877;reactome:R-HSA-5674400;refseq:NM_003952;refseq:NP_001007072;refseq:NP_003943;refseq:XM_0…	physical interactor	364874	protein interaction	Biogrid	25324306
217729	CDKL5	protein	ensembl:ENSG00000008086;ensembl:ENSP00000369325;ensembl:ENSP00000369332;ensembl:ENSP00000485244;ensembl:ENST00000379989;ensembl:ENST00000379996;ensembl:ENST00000623535;entrez-gene:6792;hgnc-id:11411;hprd:02190;humancyc:HS00230-MONOMER;intact:EBI-1752465;pdb:4BGQ;refseq:NM_001037343;refseq:NM_003159;refseq:NP_001032420;refseq:NP_001310218;refseq:NP_003150;refseq:XM_005274584;refseq:XM_005274585;re…	enzyme	421780	LRRC4C	protein	ensembl:ENSG00000148948;ensembl:ENSP00000278198;ensembl:ENSP00000434761;ensembl:ENSP00000436976;ensembl:ENSP00000437132;ensembl:ENSP00000480903;ensembl:ENST00000278198;ensembl:ENST00000527150;ensembl:ENST00000528697;ensembl:ENST00000530763;ensembl:ENST00000619527;entrez-gene:57689;hgnc-id:29317;hprd:12303;intact:EBI-3925442;pdb:3ZYJ;refseq:NM_001258419;refseq:NM_020929;refseq:NP_001245348;refseq:…	product	47304	biochemical reaction	PhosphoSitePlus	22922712
124142	GEMIN8	protein	ensembl:ENSG00000046647;ensembl:ENSP00000369895;ensembl:ENSP00000381398;ensembl:ENST00000380523;ensembl:ENST00000398355;entrez-gene:54960;hgnc-id:26044;hprd:06533;intact:EBI-2626001;reactome:R-HSA-191859;reactome:R-HSA-8932878;reactome:R-HSA-8932892;refseq:NM_001042479;refseq:NM_001042480;refseq:NM_017856;refseq:NP_001035944;refseq:NP_001035945;refseq:NP_060326;refseq:XM_005274555;refseq:XM_00527…	physical interactor	11376	SNRPG	protein	dip:DIP-34627N;ensembl:ENSG00000143977;ensembl:ENSP00000272348;ensembl:ENST00000272348;entrez-gene:6637;hgnc-id:11163;hprd:04646;intact:EBI-1056206;intact:EBI-624585;pdb:3CW1;pdb:3JCR;pdb:3PGW;pdb:4F7U;pdb:4PJO;pdb:4V98;pdb:4WZJ;pdb:5MQF;pdb:5O9Z;pdb:5XJC;pdb:5XJL;pdb:5XJQ;pdb:5XJR;pdb:5XJT;pdb:5XJU;pdb:5YZG;pdb:5Z56;pdb:5Z57;pdb:5Z58;pdb:6AH0;pdb:6AHD;pdb:6FF7;pdb:6ICZ;pdb:6ID0;pdb:6ID1;pdb:6QDV…	physical interactor	430500	protein interaction	Biogrid	28514442
14757	RBBP7	protein	dip:DIP-436N;ensembl:ENSG00000102054;ensembl:ENSP00000369424;ensembl:ENSP00000369427;ensembl:ENST00000380084;ensembl:ENST00000380087;entrez-gene:5931;hgnc-id:9890;hgnc-symbol:RBBP7;hprd:04231;intact:EBI-3505029;intact:EBI-352227;pdb:3CFS;pdb:3CFV;reactome:R-HSA-212227;reactome:R-HSA-212300;reactome:R-HSA-2559580;reactome:R-HSA-3214815;reactome:R-HSA-3214841;reactome:R-HSA-3214847;reactome:R-HSA-3…	physical interactor	55571	ARHGAP25	protein	ensembl:ENSG00000163219;ensembl:ENSP00000386241;ensembl:ENSP00000386863;ensembl:ENSP00000386911;ensembl:ENSP00000417139;ensembl:ENSP00000420583;ensembl:ENST00000409030;ensembl:ENST00000409202;ensembl:ENST00000409220;ensembl:ENST00000467265;ensembl:ENST00000497079;entrez-gene:9938;hgnc-id:28951;hprd:09805;intact:EBI-21499901;intact:EBI-25408493;intact:EBI-9052013;pdb:1V89;reactome:R-HSA-194840;rea…	physical interactor	603192	protein interaction	Biogrid	32203420
233943	CaM/Ca2+/Calcineurin A alpha-beta B1	complex		transcription factor	116197	RNF128	protein	ensembl:ENSG00000133135;ensembl:ENSP00000255499;ensembl:ENSP00000316127;ensembl:ENST00000255499;ensembl:ENST00000324342;entrez-gene:79589;hgnc-id:21153;hprd:02340;intact:EBI-2341619;pdb:3ICU;reactome:R-HSA-5689880;reactome:R-HSA-5689896;reactome:R-HSA-5690147;reactome:R-HSA-6782813;refseq:NM_024539;refseq:NM_194463;refseq:NP_078815;refseq:NP_919445;uniprot:A0PJI4;uniprot:Q6PH80;uniprot:Q6ZTJ8;uni…	product	34320	gene regulatory interaction	PID	12705856;14973438
233140	TXLNG	protein	ensembl:ENSG00000086712;ensembl:ENSP00000369465;ensembl:ENSP00000381222;ensembl:ENST00000380122;ensembl:ENST00000398155;entrez-gene:55787;hgnc-id:18578;hprd:06478;intact:EBI-3445062;refseq:NM_001168683;refseq:NM_018360;refseq:NP_001162154;refseq:NP_060830;refseq:XM_005274558;refseq:XM_017029631;refseq:XP_016885120;uniprot:Q2KQ75;uniprot:Q5JNZ7;uniprot:Q9NUQ3;uniprot:Q9P0X1;uniprot:TXLNG_HUMAN	physical interactor	51388	TBK1	protein	dip:DIP-27529N;ensembl:ENSG00000183735;ensembl:ENSP00000329967;ensembl:ENSP00000498995;ensembl:ENST00000331710;ensembl:ENST00000650790;entrez-gene:29110;hgnc-id:11584;hgnc-symbol:TBK1;hprd:05322;humancyc:HS00020-MONOMER;intact:EBI-1383470;intact:EBI-356402;intact:EBI-5773956;pdb:4EFO;pdb:4EUT;pdb:4EUU;pdb:4IM0;pdb:4IM2;pdb:4IM3;pdb:4IW0;pdb:4IWO;pdb:4IWP;pdb:4IWQ;pdb:5EOA;pdb:5EOF;pdb:5EP6;pdb:5W…	physical interactor	272670	protein interaction	Biogrid	21903422;29395067
52413	UBA1	protein	dip:DIP-33686N;ensembl:ENSG00000130985;ensembl:ENSP00000338413;ensembl:ENSP00000366568;ensembl:ENST00000335972;ensembl:ENST00000377351;entrez-gene:7317;hgnc-id:12469;hgnc-symbol:UBA1;hgnc-symbol:UBE1;hprd:02440;humancyc:HS05465-MONOMER;intact:EBI-709688;pdb:4P22;pdb:6DC6;reactome:R-HSA-8852116;reactome:R-HSA-8866652;reactome:R-HSA-947698;reactome:R-HSA-983168;refseq:NM_003334;refseq:NM_153280;ref…	enzyme	31481	RPS6KA3	protein	dip:DIP-38247N;ensembl:ENSG00000177189;ensembl:ENSP00000368884;ensembl:ENST00000379565;entrez-gene:6197;hgnc-id:10432;hgnc-symbol:RPS6KA3;hprd:02092;humancyc:HS11136-MONOMER;intact:EBI-1046616;pdb:4D9T;pdb:4D9U;pdb:4JG6;pdb:4JG7;pdb:4JG8;pdb:4NUS;pdb:4NW5;pdb:4NW6;pdb:5D9K;pdb:5D9L;reactome:R-HSA-198753;reactome:R-HSA-199830;reactome:R-HSA-199869;reactome:R-HSA-199920;reactome:R-HSA-2559582;react…	enzyme	33901;36826	biochemical reaction	BioCarta;InnateDB;Manual upload;NetPath;PID;PhosphoPOINT;PhosphoSitePlus;Spike	10066435;10074115;10085062;10096573;10329681;10398585;10421793;10437795;10469655;10521409;10527519;10644755;10722693;10723127;10754328;10764587;10783893;10807933;10811867;10823818;10882136;10889159;10938077;10990461;11027313;11042193;11057907;11106428;11157486;11158290;11231305;11259436;11266466;11297557;11350057;11359840;11368781;11502888;11527961;11533489;11673497;11706022;11724787;11742864;117…
14757	RBBP7	protein	dip:DIP-436N;ensembl:ENSG00000102054;ensembl:ENSP00000369424;ensembl:ENSP00000369427;ensembl:ENST00000380084;ensembl:ENST00000380087;entrez-gene:5931;hgnc-id:9890;hgnc-symbol:RBBP7;hprd:04231;intact:EBI-3505029;intact:EBI-352227;pdb:3CFS;pdb:3CFV;reactome:R-HSA-212227;reactome:R-HSA-212300;reactome:R-HSA-2559580;reactome:R-HSA-3214815;reactome:R-HSA-3214841;reactome:R-HSA-3214847;reactome:R-HSA-3…	physical interactor	90486	RPS6KB2	protein	ensembl:ENSG00000175634;ensembl:ENSP00000308413;ensembl:ENSP00000432847;ensembl:ENST00000312629;ensembl:ENST00000528964;entrez-gene:6199;hgnc-id:10437;hgnc-symbol:RPS6KB2;hprd:10203;humancyc:HS10964-MONOMER;intact:EBI-3905921;intact:EBI-5773494;reactome:R-HSA-198693;reactome:R-HSA-199844;reactome:R-HSA-199877;reactome:R-HSA-5674400;refseq:NM_003952;refseq:NP_001007072;refseq:NP_003943;refseq:XM_0…	physical interactor	364964	protein interaction	Biogrid	25324306
14757	RBBP7	protein	dip:DIP-436N;ensembl:ENSG00000102054;ensembl:ENSP00000369424;ensembl:ENSP00000369427;ensembl:ENST00000380084;ensembl:ENST00000380087;entrez-gene:5931;hgnc-id:9890;hgnc-symbol:RBBP7;hprd:04231;intact:EBI-3505029;intact:EBI-352227;pdb:3CFS;pdb:3CFV;reactome:R-HSA-212227;reactome:R-HSA-212300;reactome:R-HSA-2559580;reactome:R-HSA-3214815;reactome:R-HSA-3214841;reactome:R-HSA-3214847;reactome:R-HSA-3…	physical interactor	529693	q69yn44	protein	ensembl:ENSG00000164944;ensembl:ENSP00000297591;ensembl:ENSP00000398390;ensembl:ENST00000297591;ensembl:ENST00000421249;entrez-gene:25962;hgnc-id:24500;hgnc-symbol:KIAA1429;hprd:10889;intact:EBI-18054817;intact:EBI-21586473;intact:EBI-2819293;refseq:NM_015496;refseq:NM_183009;refseq:NP_056311;refseq:NP_892121;refseq:XM_017013306;refseq:XM_017013307;refseq:XM_017013308;refseq:XP_016868795;uniprot:…	physical interactor	514207	protein interaction	Biogrid	29507755
52413	UBA1	protein	dip:DIP-33686N;ensembl:ENSG00000130985;ensembl:ENSP00000338413;ensembl:ENSP00000366568;ensembl:ENST00000335972;ensembl:ENST00000377351;entrez-gene:7317;hgnc-id:12469;hgnc-symbol:UBA1;hgnc-symbol:UBE1;hprd:02440;humancyc:HS05465-MONOMER;intact:EBI-709688;pdb:4P22;pdb:6DC6;reactome:R-HSA-8852116;reactome:R-HSA-8866652;reactome:R-HSA-947698;reactome:R-HSA-983168;refseq:NM_003334;refseq:NM_153280;ref…	physical interactor	55571	ARHGAP25	protein	ensembl:ENSG00000163219;ensembl:ENSP00000386241;ensembl:ENSP00000386863;ensembl:ENSP00000386911;ensembl:ENSP00000417139;ensembl:ENSP00000420583;ensembl:ENST00000409030;ensembl:ENST00000409202;ensembl:ENST00000409220;ensembl:ENST00000467265;ensembl:ENST00000497079;entrez-gene:9938;hgnc-id:28951;hprd:09805;intact:EBI-21499901;intact:EBI-25408493;intact:EBI-9052013;pdb:1V89;reactome:R-HSA-194840;rea…	physical interactor	604104	protein interaction	Biogrid	32203420
52413	UBA1	protein	dip:DIP-33686N;ensembl:ENSG00000130985;ensembl:ENSP00000338413;ensembl:ENSP00000366568;ensembl:ENST00000335972;ensembl:ENST00000377351;entrez-gene:7317;hgnc-id:12469;hgnc-symbol:UBA1;hgnc-symbol:UBE1;hprd:02440;humancyc:HS05465-MONOMER;intact:EBI-709688;pdb:4P22;pdb:6DC6;reactome:R-HSA-8852116;reactome:R-HSA-8866652;reactome:R-HSA-947698;reactome:R-HSA-983168;refseq:NM_003334;refseq:NM_153280;ref…	physical interactor	47080	SBF2	protein	ensembl:ENSG00000133812;ensembl:ENSP00000256190;ensembl:ENST00000256190;entrez-gene:81846;hgnc-id:2135;hprd:09649;intact:EBI-2683289;reactome:R-HSA-1660499;reactome:R-HSA-6809792;reactome:R-HSA-8876198;refseq:NM_030962;refseq:NP_112224;refseq:XM_005253154;refseq:XM_005253155;refseq:XP_005253211;uniprot:MTMRD_HUMAN;uniprot:Q3MJF0;uniprot:Q68DQ3;uniprot:Q6P459;uniprot:Q6PJD1;uniprot:Q7Z325;uniprot:…	physical interactor	414821	protein interaction	Biogrid	27880917
133908	DDX3X	protein	dip:DIP-27551N;ensembl:ENSG00000215301;ensembl:ENSP00000382840;ensembl:ENSP00000392494;ensembl:ENSP00000478443;ensembl:ENSP00000486516;ensembl:ENSP00000486720;ensembl:ENSP00000487224;ensembl:ENSP00000494040;ensembl:ENST00000457138;ensembl:ENST00000478993;ensembl:ENST00000629496;ensembl:ENST00000629785;ensembl:ENST00000630255;ensembl:ENST00000644876;entrez-gene:1654;hgnc-id:2745;hgnc-symbol:DDX3X;…	physical interactor	28125	DOCK4	protein	ensembl:ENSG00000128512;ensembl:ENSP00000404179;ensembl:ENSP00000410746;ensembl:ENST00000428084;ensembl:ENST00000437633;entrez-gene:9732;hgnc-id:19192;hprd:07407;intact:EBI-1059186;intact:EBI-21557617;reactome:R-HSA-1012995;reactome:R-HSA-983231;refseq:NM_014705;refseq:NP_055520;refseq:XM_006716188;refseq:XM_006716189;refseq:XM_017012819;refseq:XM_017012820;refseq:XM_017012821;refseq:XM_017012822…	physical interactor	589969	protein interaction	Biogrid	29395067
12405	USP9X	protein	dip:DIP-27562N;ensembl:ENSG00000124486;ensembl:ENSP00000316357;ensembl:ENSP00000367558;entrez-gene:8239;hgnc-id:12632;hgnc-symbol:USP9X;hprd:02091;humancyc:HS04777-MONOMER;intact:EBI-1058656;intact:EBI-10964523;intact:EBI-302524;reactome:R-HSA-870499;refseq:NM_001039590;refseq:NM_001039591;refseq:NM_004652;refseq:NM_021906;refseq:NP_001034680;refseq:NP_004643;refseq:NP_068706;refseq:XM_005272675;…	physical interactor	10330	ALDH1A3	protein	ensembl:ENSG00000184254;ensembl:ENSP00000332256;ensembl:ENST00000329841;entrez-gene:220;hgnc-id:409;hprd:02713;humancyc:HS00013-MONOMER;intact:EBI-21573752;kegg:hsa:220;pdb:5FHZ;pdb:6S6W;reactome:R-HSA-2980896;reactome:R-HSA-5365859;refseq:NM_000693;refseq:NM_001293815;refseq:NP_000684;refseq:NP_001280744;uniprot:A0A024RC95;uniprot:AL1A3_HUMAN;uniprot:P47895;uniprot:Q6NT64	physical interactor	537494	protein interaction	Biogrid	30958800
432902	GPRASP1	protein	ensembl:ENSG00000198932;ensembl:ENSP00000355146;ensembl:ENSP00000393691;ensembl:ENSP00000409420;ensembl:ENSP00000445683;ensembl:ENSP00000498934;ensembl:ENST00000361600;ensembl:ENST00000415986;ensembl:ENST00000444152;ensembl:ENST00000537097;ensembl:ENST00000652542;entrez-gene:9737;hgnc-id:24834;hgnc-symbol:GPRASP1;hprd:02333;intact:EBI-2514717;refseq:NM_001099410;refseq:NM_001099411;refseq:NM_0011…	physical interactor	41336	MTF2	protein	ensembl:ENSG00000143033;ensembl:ENSP00000359321;ensembl:ENSP00000359326;ensembl:ENSP00000443295;ensembl:ENSP00000444962;ensembl:ENST00000370298;ensembl:ENST00000370303;ensembl:ENST00000540243;ensembl:ENST00000545708;entrez-gene:22823;hgnc-id:29535;hgnc-symbol:MTF2;hprd:14342;intact:EBI-10698053;intact:EBI-11028207;intact:EBI-725816;pdb:5XFR;reactome:R-HSA-212300;reactome:R-HSA-5084119;refseq:NC_0…	physical interactor	241071	protein interaction	HPRD;Spike	16169070
37795	SH3KBP1	protein	dip:DIP-31803N;ensembl:ENSG00000147010;ensembl:ENSP00000369020;ensembl:ENSP00000369039;ensembl:ENSP00000380921;ensembl:ENST00000379698;ensembl:ENST00000379716;ensembl:ENST00000397821;entrez-gene:30011;hgnc-id:13867;hgnc-symbol:SH3KBP1;hprd:02301;intact:EBI-346595;pdb:2BZ8;pdb:2K6D;pdb:2K9G;pdb:2N64;pdb:2O2O;pdb:2YDL;pdb:5ABS;reactome:R-HSA-182926;reactome:R-HSA-182955;reactome:R-HSA-182957;reacto…	physical interactor	487111	milk1_human	protein	ensembl:ENSG00000100139;ensembl:ENSP00000215957;ensembl:ENST00000215957;entrez-gene:85377;hgnc-id:29804;hprd:11363;intact:EBI-1056885;pdb:2KSP;refseq:NM_033386;refseq:NP_203744;refseq:XM_005261791;refseq:XM_005261792;refseq:XM_006724345;refseq:XM_011530471;refseq:XM_011530472;refseq:XM_011530473;refseq:XM_011530474;refseq:XM_011530475;refseq:XM_017029026;uniprot:MILK1_HUMAN;uniprot:Q5TI16;uniprot…	physical interactor	278590	protein interaction	Biogrid	19531213;28514442;31980649
133908	DDX3X	protein	dip:DIP-27551N;ensembl:ENSG00000215301;ensembl:ENSP00000382840;ensembl:ENSP00000392494;ensembl:ENSP00000478443;ensembl:ENSP00000486516;ensembl:ENSP00000486720;ensembl:ENSP00000487224;ensembl:ENSP00000494040;ensembl:ENST00000457138;ensembl:ENST00000478993;ensembl:ENST00000629496;ensembl:ENST00000629785;ensembl:ENST00000630255;ensembl:ENST00000644876;entrez-gene:1654;hgnc-id:2745;hgnc-symbol:DDX3X;…	physical interactor	8101	APBB1	protein	dip:DIP-30903N;ensembl:ENSG00000166313;ensembl:ENSP00000299402;ensembl:ENSP00000311912;ensembl:ENSP00000433338;ensembl:ENSP00000476442;ensembl:ENSP00000476646;ensembl:ENSP00000476846;ensembl:ENSP00000476871;ensembl:ENSP00000477069;ensembl:ENSP00000477213;ensembl:ENST00000299402;ensembl:ENST00000311051;ensembl:ENST00000530885;ensembl:ENST00000608394;ensembl:ENST00000608645;ensembl:ENST00000608655;…	physical interactor	319928	protein interaction	Biogrid	16055720
51388	TBK1	protein	dip:DIP-27529N;ensembl:ENSG00000183735;ensembl:ENSP00000329967;ensembl:ENSP00000498995;ensembl:ENST00000331710;ensembl:ENST00000650790;entrez-gene:29110;hgnc-id:11584;hgnc-symbol:TBK1;hprd:05322;humancyc:HS00020-MONOMER;intact:EBI-1383470;intact:EBI-356402;intact:EBI-5773956;pdb:4EFO;pdb:4EUT;pdb:4EUU;pdb:4IM0;pdb:4IM2;pdb:4IM3;pdb:4IW0;pdb:4IWO;pdb:4IWP;pdb:4IWQ;pdb:5EOA;pdb:5EOF;pdb:5EP6;pdb:5W…	enzyme	90486	RPS6KB2	protein	ensembl:ENSG00000175634;ensembl:ENSP00000308413;ensembl:ENSP00000432847;ensembl:ENST00000312629;ensembl:ENST00000528964;entrez-gene:6199;hgnc-id:10437;hgnc-symbol:RPS6KB2;hprd:10203;humancyc:HS10964-MONOMER;intact:EBI-3905921;intact:EBI-5773494;reactome:R-HSA-198693;reactome:R-HSA-199844;reactome:R-HSA-199877;reactome:R-HSA-5674400;refseq:NM_003952;refseq:NP_001007072;refseq:NP_003943;refseq:XM_0…	enzyme	29236	biochemical reaction	HumanCyc	10662544;8774846
3255129	CDKL5	rna	ensembl:ENSP00000369325;ensembl:ENSP00000369332;entrez-gene:6792;hgnc-id:11411;hprd:02190;refseq:NM_001037343;refseq:NM_003159;refseq:XM_005274584;refseq:XM_005274585;refseq:XM_006724511;refseq:XP_005274641;uniprot:O76039	physical interactor	529693	q69yn44	protein	ensembl:ENSG00000164944;ensembl:ENSP00000297591;ensembl:ENSP00000398390;ensembl:ENST00000297591;ensembl:ENST00000421249;entrez-gene:25962;hgnc-id:24500;hgnc-symbol:KIAA1429;hprd:10889;intact:EBI-18054817;intact:EBI-21586473;intact:EBI-2819293;refseq:NM_015496;refseq:NM_183009;refseq:NP_056311;refseq:NP_892121;refseq:XM_017013306;refseq:XM_017013307;refseq:XM_017013308;refseq:XP_016868795;uniprot:…	physical interactor	510781	protein interaction	Biogrid	29507755
7564	PPEF1	protein	ensembl:ENSG00000086717;ensembl:ENSP00000341892;ensembl:ENSP00000354871;ensembl:ENST00000349874;ensembl:ENST00000361511;entrez-gene:5475;hgnc-id:9243;hprd:02118;humancyc:HS01541-MONOMER;intact:EBI-2931238;reactome:R-HSA-2514859;reactome:R-HSA-2632517;refseq:NM_006240;refseq:NM_152223;refseq:NM_152224;refseq:NM_152225;refseq:NM_152226;refseq:NP_006231;refseq:NP_689409;refseq:NP_689410;refseq:NP_68…	physical interactor	28606	CTPS1	protein	ensembl:ENSG00000171793;ensembl:ENSP00000361699;ensembl:ENSP00000361704;ensembl:ENSP00000497602;ensembl:ENSP00000497744;ensembl:ENST00000372616;ensembl:ENST00000649124;ensembl:ENST00000650070;entrez-gene:1503;hgnc-id:2519;hgnc-symbol:CTPS1;hprd:00465;humancyc:HS10382-MONOMER;intact:EBI-1042983;kegg:hsa:1503;pdb:2VO1;pdb:5U03;reactome:R-HSA-499943;reactome:R-HSA-73536;refseq:NM_001301237;refseq:NM…	physical interactor	470998	protein interaction	Biogrid	28330616
133908	DDX3X	protein	dip:DIP-27551N;ensembl:ENSG00000215301;ensembl:ENSP00000382840;ensembl:ENSP00000392494;ensembl:ENSP00000478443;ensembl:ENSP00000486516;ensembl:ENSP00000486720;ensembl:ENSP00000487224;ensembl:ENSP00000494040;ensembl:ENST00000457138;ensembl:ENST00000478993;ensembl:ENST00000629496;ensembl:ENST00000629785;ensembl:ENST00000630255;ensembl:ENST00000644876;entrez-gene:1654;hgnc-id:2745;hgnc-symbol:DDX3X;…	physical interactor	464214	UBL7	protein	ensembl:ENSG00000138629;ensembl:ENSG00000288408;ensembl:ENSP00000354883;ensembl:ENSP00000378518;ensembl:ENSP00000454828;ensembl:ENSP00000457703;ensembl:ENSP00000457708;ensembl:ENSP00000500164;ensembl:ENSP00000500266;ensembl:ENSP00000500442;ensembl:ENSP00000500520;ensembl:ENSP00000500882;ensembl:ENST00000361351;ensembl:ENST00000395081;ensembl:ENST00000564488;ensembl:ENST00000565335;ensembl:ENST000…	physical interactor	368810	protein interaction	Biogrid	26344197
64676	CNIH3	protein	ensembl:ENSG00000143786;ensembl:ENSP00000272133;ensembl:ENST00000272133;entrez-gene:149111;hgnc-id:26802;hprd:08799;intact:EBI-12208021;reactome:R-HSA-204005;reactome:R-HSA-5689443;reactome:R-HSA-5689783;reactome:R-HSA-5689785;reactome:R-HSA-5694530;refseq:NM_152495;refseq:NP_689708;refseq:XM_005273075;uniprot:CNIH3_HUMAN;uniprot:Q8TBE1	physical interactor	39869	PLD3	protein	ensembl:ENSG00000105223;ensembl:ENSP00000348901;ensembl:ENSP00000386293;ensembl:ENSP00000386938;ensembl:ENSP00000387022;ensembl:ENSP00000387050;ensembl:ENST00000356508;ensembl:ENST00000409281;ensembl:ENST00000409419;ensembl:ENST00000409587;ensembl:ENST00000409735;entrez-gene:23646;hgnc-id:17158;hprd:07148;humancyc:HS02695-MONOMER;intact:EBI-2689908;kegg:hsa:23646;reactome:R-HSA-1483148;reactome:R…	physical interactor	98988	protein interaction	Biogrid;IntAct	32296183;unassigned1304
482298	HTATSF1	protein	dip:DIP-42095N;ensembl:ENSG00000102241;ensembl:ENSP00000218364;ensembl:ENSP00000442699;ensembl:ENST00000218364;ensembl:ENST00000535601;entrez-gene:27336;hgnc-id:5276;hgnc-symbol:HTATSF1;hprd:02282;intact:EBI-720468;pdb:2DIT;pdb:6N3D;pdb:6N3E;pdb:6N3F;pdb:6NSX;pdb:6Y50;pdb:6Y53;pdb:6Y5Q;refseq:NM_001163280;refseq:NM_014500;refseq:NP_001156752;refseq:NP_055315;refseq:XM_005262404;refseq:XP_00526246…	physical interactor	11376	SNRPG	protein	dip:DIP-34627N;ensembl:ENSG00000143977;ensembl:ENSP00000272348;ensembl:ENST00000272348;entrez-gene:6637;hgnc-id:11163;hprd:04646;intact:EBI-1056206;intact:EBI-624585;pdb:3CW1;pdb:3JCR;pdb:3PGW;pdb:4F7U;pdb:4PJO;pdb:4V98;pdb:4WZJ;pdb:5MQF;pdb:5O9Z;pdb:5XJC;pdb:5XJL;pdb:5XJQ;pdb:5XJR;pdb:5XJT;pdb:5XJU;pdb:5YZG;pdb:5Z56;pdb:5Z57;pdb:5Z58;pdb:6AH0;pdb:6AHD;pdb:6FF7;pdb:6ICZ;pdb:6ID0;pdb:6ID1;pdb:6QDV…	physical interactor	426519	protein interaction	Biogrid	28514442
146191	ZRSR2	protein	dip:DIP-62117N;ensembl:ENSG00000169249;ensembl:ENSP00000303015;ensembl:ENST00000307771;entrez-gene:8233;hgnc-id:23019;hprd:02068;intact:EBI-6657923;reactome:R-HSA-72165;reactome:R-HSA-8865914;refseq:NM_005089;refseq:NP_005080;refseq:XM_005274597;refseq:XM_006724519;refseq:XM_006724520;refseq:XM_011545589;refseq:XM_017029881;uniprot:Q14D69;uniprot:Q15696;uniprot:U2AFM_HUMAN	physical interactor	76170	SERPINB8	protein	ensembl:ENSG00000166401;ensembl:ENSP00000331368;ensembl:ENSP00000381072;ensembl:ENSP00000381075;ensembl:ENSP00000438328;ensembl:ENST00000353706;ensembl:ENST00000397985;ensembl:ENST00000397988;ensembl:ENST00000542677;entrez-gene:5271;hgnc-id:8952;hprd:03412;intact:EBI-20839968;intact:EBI-6916752;reactome:R-HSA-2990856;reactome:R-HSA-75205;refseq:NC_000018;refseq:NM_001031848;refseq:NM_001276490;re…	physical interactor	362318	protein interaction	Biogrid	26186194;28514442
71122	EIF2S3	protein	ensembl:ENSG00000130741;ensembl:ENSP00000253039;ensembl:ENST00000253039;entrez-gene:1968;hgnc-id:3267;hgnc-symbol:EIF2S3;hprd:02155;intact:EBI-1054228;intact:EBI-11602611;pdb:6FEC;pdb:6K71;pdb:6K72;pdb:6O81;pdb:6O85;pdb:6YBV;pdb:6ZMW;pdb:6ZP4;pdb:7A09;reactome:R-HSA-156827;reactome:R-HSA-381042;reactome:R-HSA-382556;reactome:R-HSA-72514;reactome:R-HSA-72649;reactome:R-HSA-72695;reactome:R-HSA-727…	physical interactor	90486	RPS6KB2	protein	ensembl:ENSG00000175634;ensembl:ENSP00000308413;ensembl:ENSP00000432847;ensembl:ENST00000312629;ensembl:ENST00000528964;entrez-gene:6199;hgnc-id:10437;hgnc-symbol:RPS6KB2;hprd:10203;humancyc:HS10964-MONOMER;intact:EBI-3905921;intact:EBI-5773494;reactome:R-HSA-198693;reactome:R-HSA-199844;reactome:R-HSA-199877;reactome:R-HSA-5674400;refseq:NM_003952;refseq:NP_001007072;refseq:NP_003943;refseq:XM_0…	physical interactor	502126	protein interaction	Biogrid	30320934
14757	RBBP7	protein	dip:DIP-436N;ensembl:ENSG00000102054;ensembl:ENSP00000369424;ensembl:ENSP00000369427;ensembl:ENST00000380084;ensembl:ENST00000380087;entrez-gene:5931;hgnc-id:9890;hgnc-symbol:RBBP7;hprd:04231;intact:EBI-3505029;intact:EBI-352227;pdb:3CFS;pdb:3CFV;reactome:R-HSA-212227;reactome:R-HSA-212300;reactome:R-HSA-2559580;reactome:R-HSA-3214815;reactome:R-HSA-3214841;reactome:R-HSA-3214847;reactome:R-HSA-3…	physical interactor	314534	KPNA6	protein	dip:DIP-27609N;ensembl:ENSG00000025800;ensembl:ENSP00000362728;ensembl:ENST00000373625;entrez-gene:23633;hgnc-id:6399;hgnc-symbol:KPNA6;hprd:09465;intact:EBI-359923;pdb:4UAD;refseq:NM_012316;refseq:NP_036448;refseq:XM_005270711;uniprot:B2RDC7;uniprot:D3DPP5;uniprot:IMA7_HUMAN;uniprot:O60684;uniprot:Q5VVU3	physical interactor	467757	protein interaction	Biogrid	27705803
8202	KDM4B	protein	dip:DIP-47283N;ensembl:ENSG00000127663;ensembl:ENSP00000159111;ensembl:ENSP00000371178;ensembl:ENSP00000480642;ensembl:ENST00000381759;entrez-gene:23030;hgnc-id:29136;hprd:11056;intact:EBI-725902;pdb:4LXL;pdb:4UC4;reactome:R-HSA-3214396;reactome:R-HSA-3214842;reactome:R-HSA-5683074;reactome:R-HSA-5693565;reactome:R-HSA-9011732;reactome:R-HSA-9018519;refseq:NM_015015;refseq:NP_055830;refseq:XM_005…	activator	125490	KDM5A	protein	dip:DIP-472N;ensembl:ENSP00000382688;entrez-gene:5927;hgnc-id:9886;hgnc-symbol:JARID1A;hprd:08915;intact:EBI-11043810;intact:EBI-1560836;pdb:2JXJ;reactome:R-HSA-3215029;refseq:NM_001042603;refseq:NP_001036068;refseq:NP_005047;uniprot:A8MUS2;uniprot:A8MV76;uniprot:JAD1A_HUMAN;uniprot:KDM5A_HUMAN;uniprot:P29375;uniprot:Q4LE72;uniprot:Q86XZ1	activator	644652	biochemical reaction	Spike
46934	MTMR1	protein	ensembl:ENSG00000063601;ensembl:ENSP00000359417;ensembl:ENSP00000414178;ensembl:ENSP00000434105;ensembl:ENST00000370390;ensembl:ENST00000485376;entrez-gene:8776;hgnc-id:7449;hprd:02163;intact:EBI-11320553;intact:EBI-21556035;kegg:hsa:8776;pdb:5C16;reactome:R-HSA-1604647;reactome:R-HSA-1660499;refseq:NC_000023;refseq:NM_001306144;refseq:NM_001306145;refseq:NM_003828;refseq:NP_003819;refseq:XM_0052…	physical interactor	450595	SLC4A1AP	protein	ensembl:ENSG00000163798;ensembl:ENSP00000323837;ensembl:ENSP00000479964;ensembl:ENST00000326019;ensembl:ENST00000613058;entrez-gene:22950;hgnc-id:13813;hgnc-symbol:SLC4A1AP;hprd:04038;intact:EBI-1999704;pdb:4H87;refseq:NC_000002;refseq:NM_018158;refseq:NP_060628;uniprot:A6NJ39;uniprot:NADAP_HUMAN;uniprot:Q4KMT1;uniprot:Q4KMX0;uniprot:Q7Z5Q9;uniprot:Q9BWU0;uniprot:Q9NVN2	physical interactor	413922	protein interaction	Biogrid	25659891;27880917
31481	RPS6KA3	protein	dip:DIP-38247N;ensembl:ENSG00000177189;ensembl:ENSP00000368884;ensembl:ENST00000379565;entrez-gene:6197;hgnc-id:10432;hgnc-symbol:RPS6KA3;hprd:02092;humancyc:HS11136-MONOMER;intact:EBI-1046616;pdb:4D9T;pdb:4D9U;pdb:4JG6;pdb:4JG7;pdb:4JG8;pdb:4NUS;pdb:4NW5;pdb:4NW6;pdb:5D9K;pdb:5D9L;reactome:R-HSA-198753;reactome:R-HSA-199830;reactome:R-HSA-199869;reactome:R-HSA-199920;reactome:R-HSA-2559582;react…	enzyme	90486	RPS6KB2	protein	ensembl:ENSG00000175634;ensembl:ENSP00000308413;ensembl:ENSP00000432847;ensembl:ENST00000312629;ensembl:ENST00000528964;entrez-gene:6199;hgnc-id:10437;hgnc-symbol:RPS6KB2;hprd:10203;humancyc:HS10964-MONOMER;intact:EBI-3905921;intact:EBI-5773494;reactome:R-HSA-198693;reactome:R-HSA-199844;reactome:R-HSA-199877;reactome:R-HSA-5674400;refseq:NM_003952;refseq:NP_001007072;refseq:NP_003943;refseq:XM_0…	enzyme	29236;32656;33133;34073;34494	biochemical reaction	BioCarta;HumanCyc;INOH;Manual upload;NetPath;PID;PhosphoPOINT;PhosphoSitePlus;Spike	10092671;10373522;10385529;10601262;10623656;10662544;10716737;10729337;10748124;10995469;11035810;11171059;11254732;11289110;11331582;11340086;11389054;11495916;11500363;11500364;11513750;11520785;11525734;11551908;11563975;11577096;11579131;11583116;11779850;11809746;11877389;11884598;11917136;11940578;11956225;12054501;12091467;12147701;12167628;12167717;12171600;12181443;12193593;12200436;122…
529693	q69yn44	protein	ensembl:ENSG00000164944;ensembl:ENSP00000297591;ensembl:ENSP00000398390;ensembl:ENST00000297591;ensembl:ENST00000421249;entrez-gene:25962;hgnc-id:24500;hgnc-symbol:KIAA1429;hprd:10889;intact:EBI-18054817;intact:EBI-21586473;intact:EBI-2819293;refseq:NM_015496;refseq:NM_183009;refseq:NP_056311;refseq:NP_892121;refseq:XM_017013306;refseq:XM_017013307;refseq:XM_017013308;refseq:XP_016868795;uniprot:…	physical interactor	70925	HSPH1	protein	ensembl:ENSG00000120694;ensembl:ENSP00000318687;ensembl:ENSP00000369768;ensembl:ENSP00000396090;ensembl:ENSP00000487365;ensembl:ENST00000320027;ensembl:ENST00000380405;ensembl:ENST00000630972;entrez-gene:10808;hgnc-id:16969;hgnc-symbol:HSPH1;hprd:09990;intact:EBI-2859494;intact:EBI-356829;pdb:6GFA;reactome:R-HSA-3000484;reactome:R-HSA-3221883;reactome:R-HSA-3221904;reactome:R-HSA-3299412;reactome…	physical interactor	514131	protein interaction	Biogrid	29507755
2702445	TXLNG	rna	ensembl:ENSP00000369465;ensembl:ENSP00000381222;entrez-gene:55787;hgnc-id:18578;hprd:06478;refseq:NM_001168683;refseq:NM_018360;refseq:XM_005274558;refseq:XM_017029631;refseq:XP_016885120;uniprot:Q9NUQ3	physical interactor	529693	q69yn44	protein	ensembl:ENSG00000164944;ensembl:ENSP00000297591;ensembl:ENSP00000398390;ensembl:ENST00000297591;ensembl:ENST00000421249;entrez-gene:25962;hgnc-id:24500;hgnc-symbol:KIAA1429;hprd:10889;intact:EBI-18054817;intact:EBI-21586473;intact:EBI-2819293;refseq:NM_015496;refseq:NM_183009;refseq:NP_056311;refseq:NP_892121;refseq:XM_017013306;refseq:XM_017013307;refseq:XM_017013308;refseq:XP_016868795;uniprot:…	physical interactor	512139	protein interaction	Biogrid	29507755
146196	SNRNP35	protein	ensembl:ENSG00000184209;ensembl:ENSP00000340774;ensembl:ENSP00000403310;ensembl:ENSP00000432595;ensembl:ENST00000350887;ensembl:ENST00000412157;ensembl:ENST00000526639;entrez-gene:11066;hgnc-id:30852;hprd:15595;intact:EBI-6657950;reactome:R-HSA-6787852;reactome:R-HSA-72165;refseq:NM_022717;refseq:NM_180699;refseq:NP_073208;refseq:NP_851030;refseq:XM_005253545;refseq:XM_006719204;refseq:XP_0052536…	physical interactor	11376	SNRPG	protein	dip:DIP-34627N;ensembl:ENSG00000143977;ensembl:ENSP00000272348;ensembl:ENST00000272348;entrez-gene:6637;hgnc-id:11163;hprd:04646;intact:EBI-1056206;intact:EBI-624585;pdb:3CW1;pdb:3JCR;pdb:3PGW;pdb:4F7U;pdb:4PJO;pdb:4V98;pdb:4WZJ;pdb:5MQF;pdb:5O9Z;pdb:5XJC;pdb:5XJL;pdb:5XJQ;pdb:5XJR;pdb:5XJT;pdb:5XJU;pdb:5YZG;pdb:5Z56;pdb:5Z57;pdb:5Z58;pdb:6AH0;pdb:6AHD;pdb:6FF7;pdb:6ICZ;pdb:6ID0;pdb:6ID1;pdb:6QDV…	physical interactor	419373	protein interaction	Biogrid	28514442
12405	USP9X	protein	dip:DIP-27562N;ensembl:ENSG00000124486;ensembl:ENSP00000316357;ensembl:ENSP00000367558;entrez-gene:8239;hgnc-id:12632;hgnc-symbol:USP9X;hprd:02091;humancyc:HS04777-MONOMER;intact:EBI-1058656;intact:EBI-10964523;intact:EBI-302524;reactome:R-HSA-870499;refseq:NM_001039590;refseq:NM_001039591;refseq:NM_004652;refseq:NM_021906;refseq:NP_001034680;refseq:NP_004643;refseq:NP_068706;refseq:XM_005272675;…	physical interactor	499210	rasfa_human	protein	ensembl:ENSG00000189431;ensembl:ENSP00000485526;ensembl:ENST00000529419;entrez-gene:644943;hgnc-id:33984;intact:EBI-6912267;refseq:NM_001080521;refseq:NP_001073990;uniprot:A6NK89;uniprot:RASFA_HUMAN	physical interactor	364815	protein interaction	Biogrid	24366813
